# Supplementary material for: Diversity and signature of small RNA in different bodily fluids using next generation sequencing
Source: PubMed Central journal article supplement (PMC5975555; doi:10.1186/s12864-018-4785-8), 2018-05-29

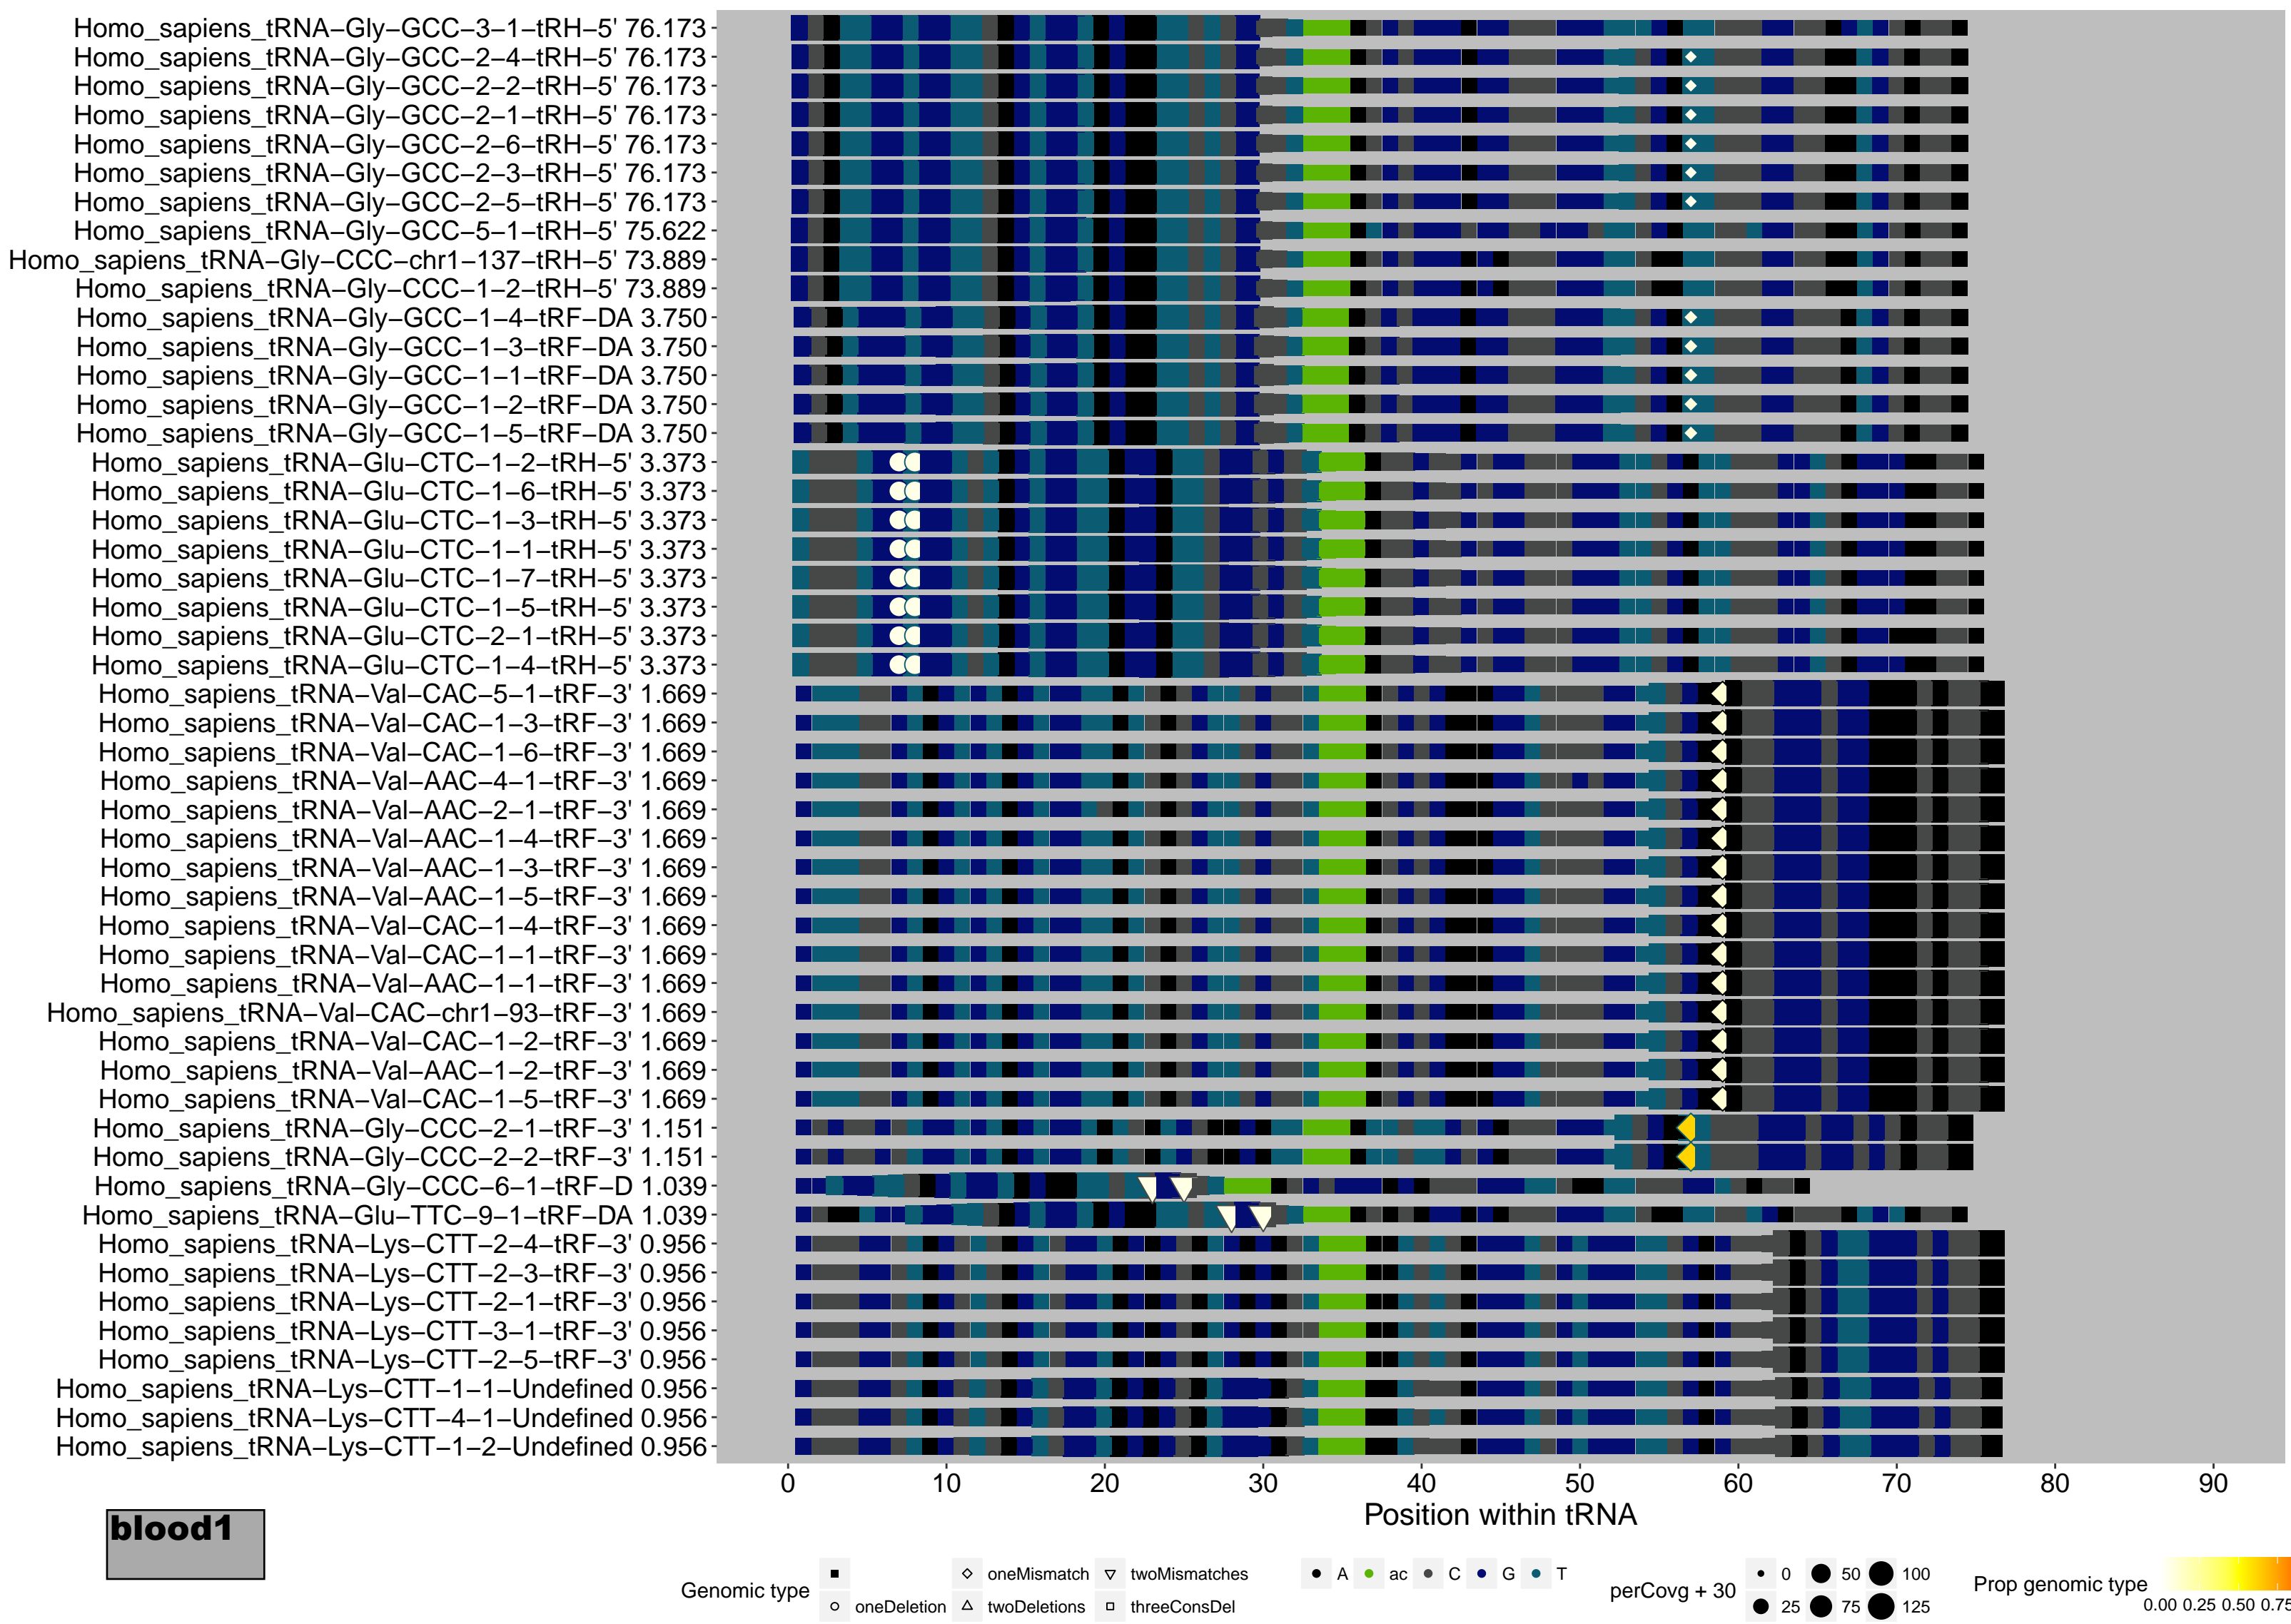

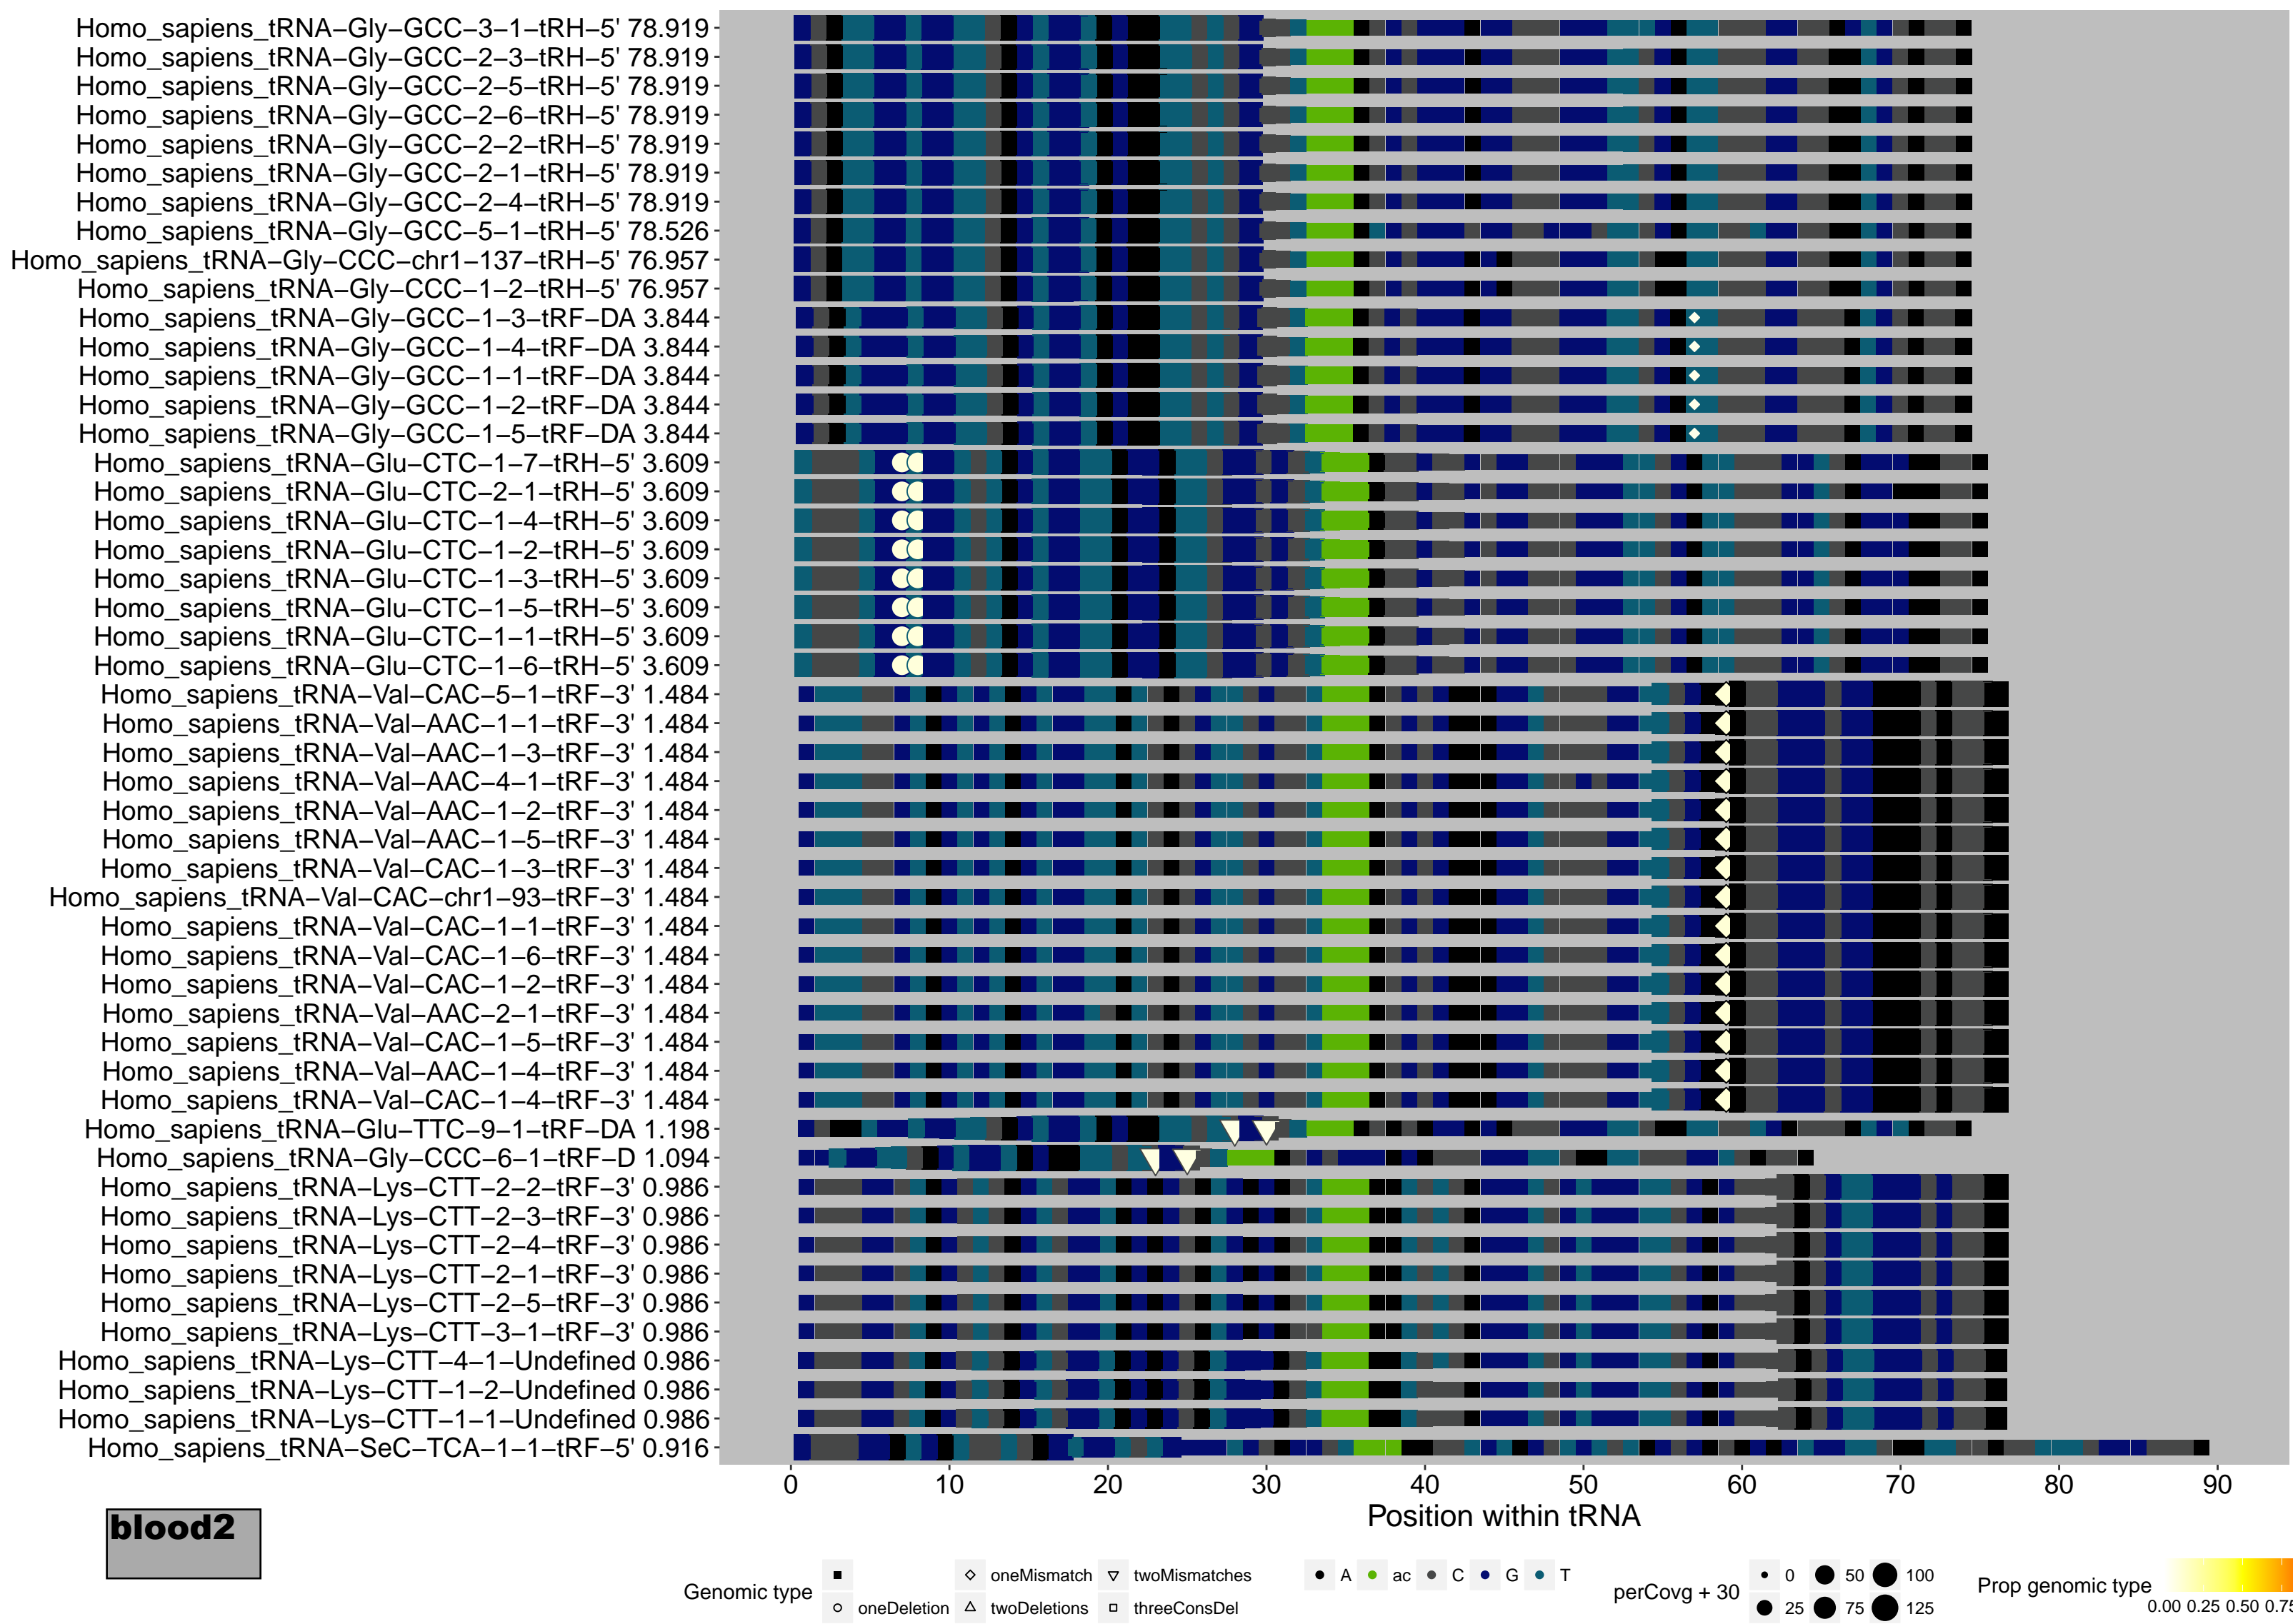

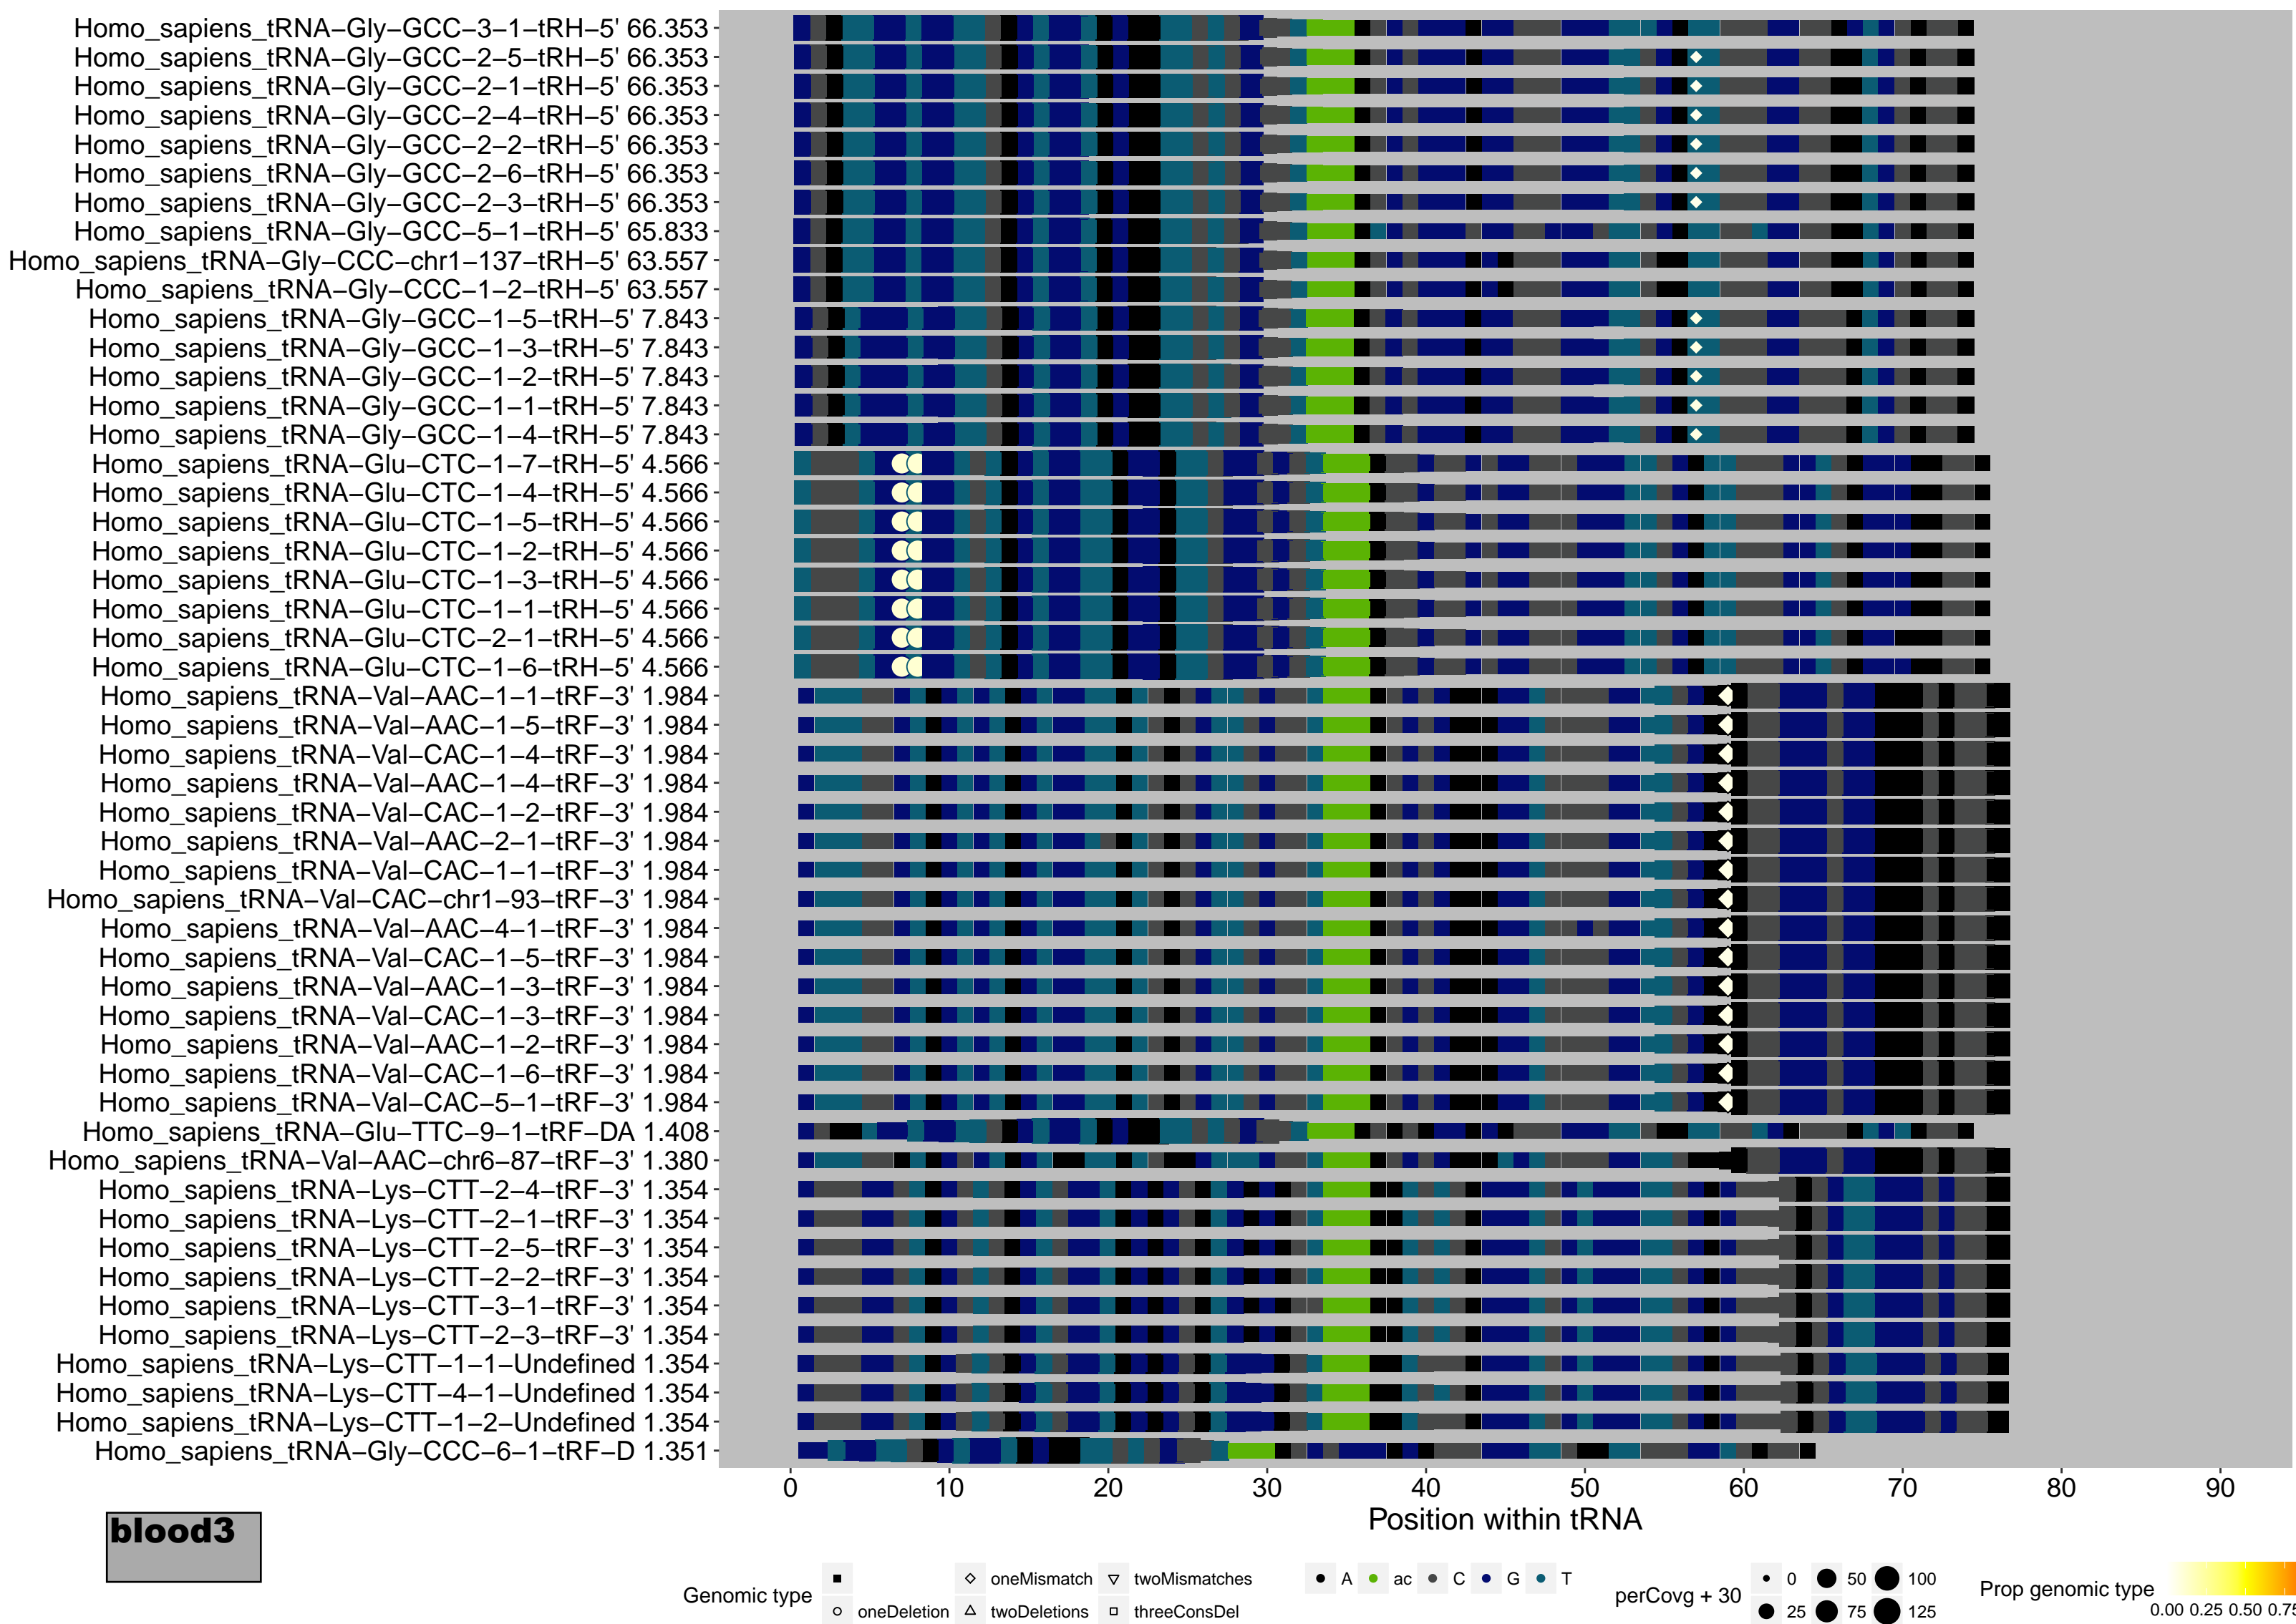

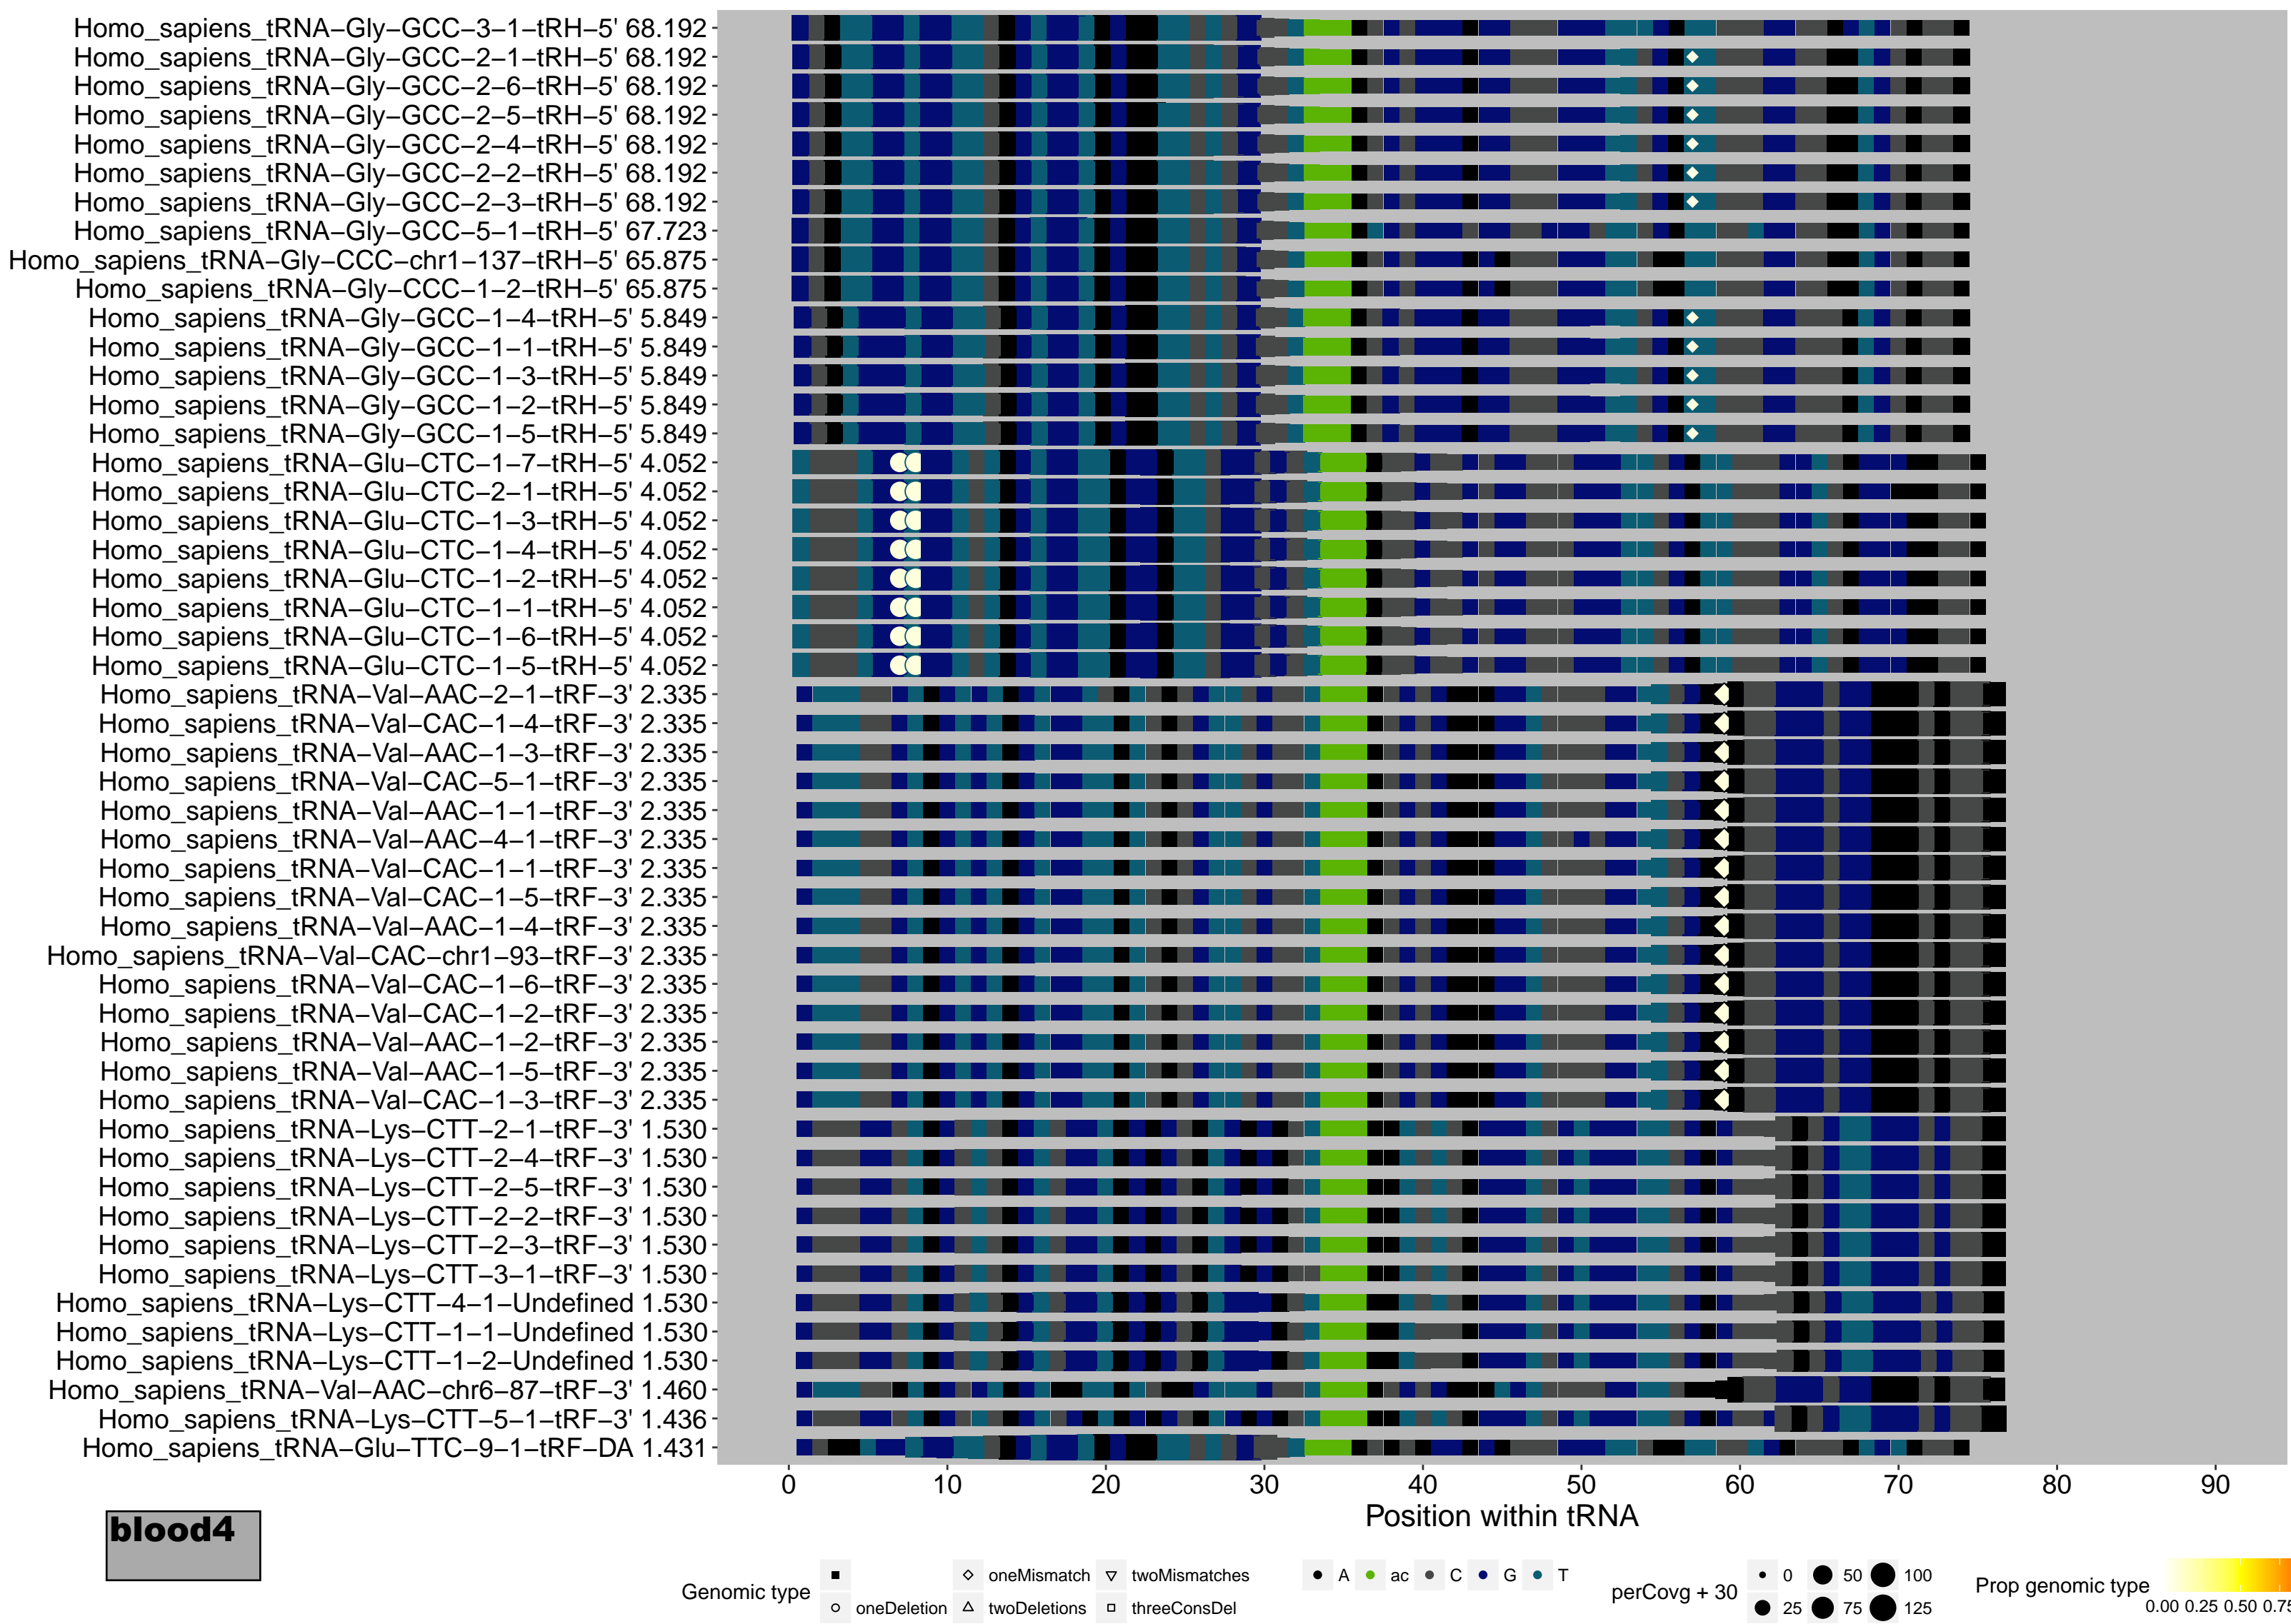

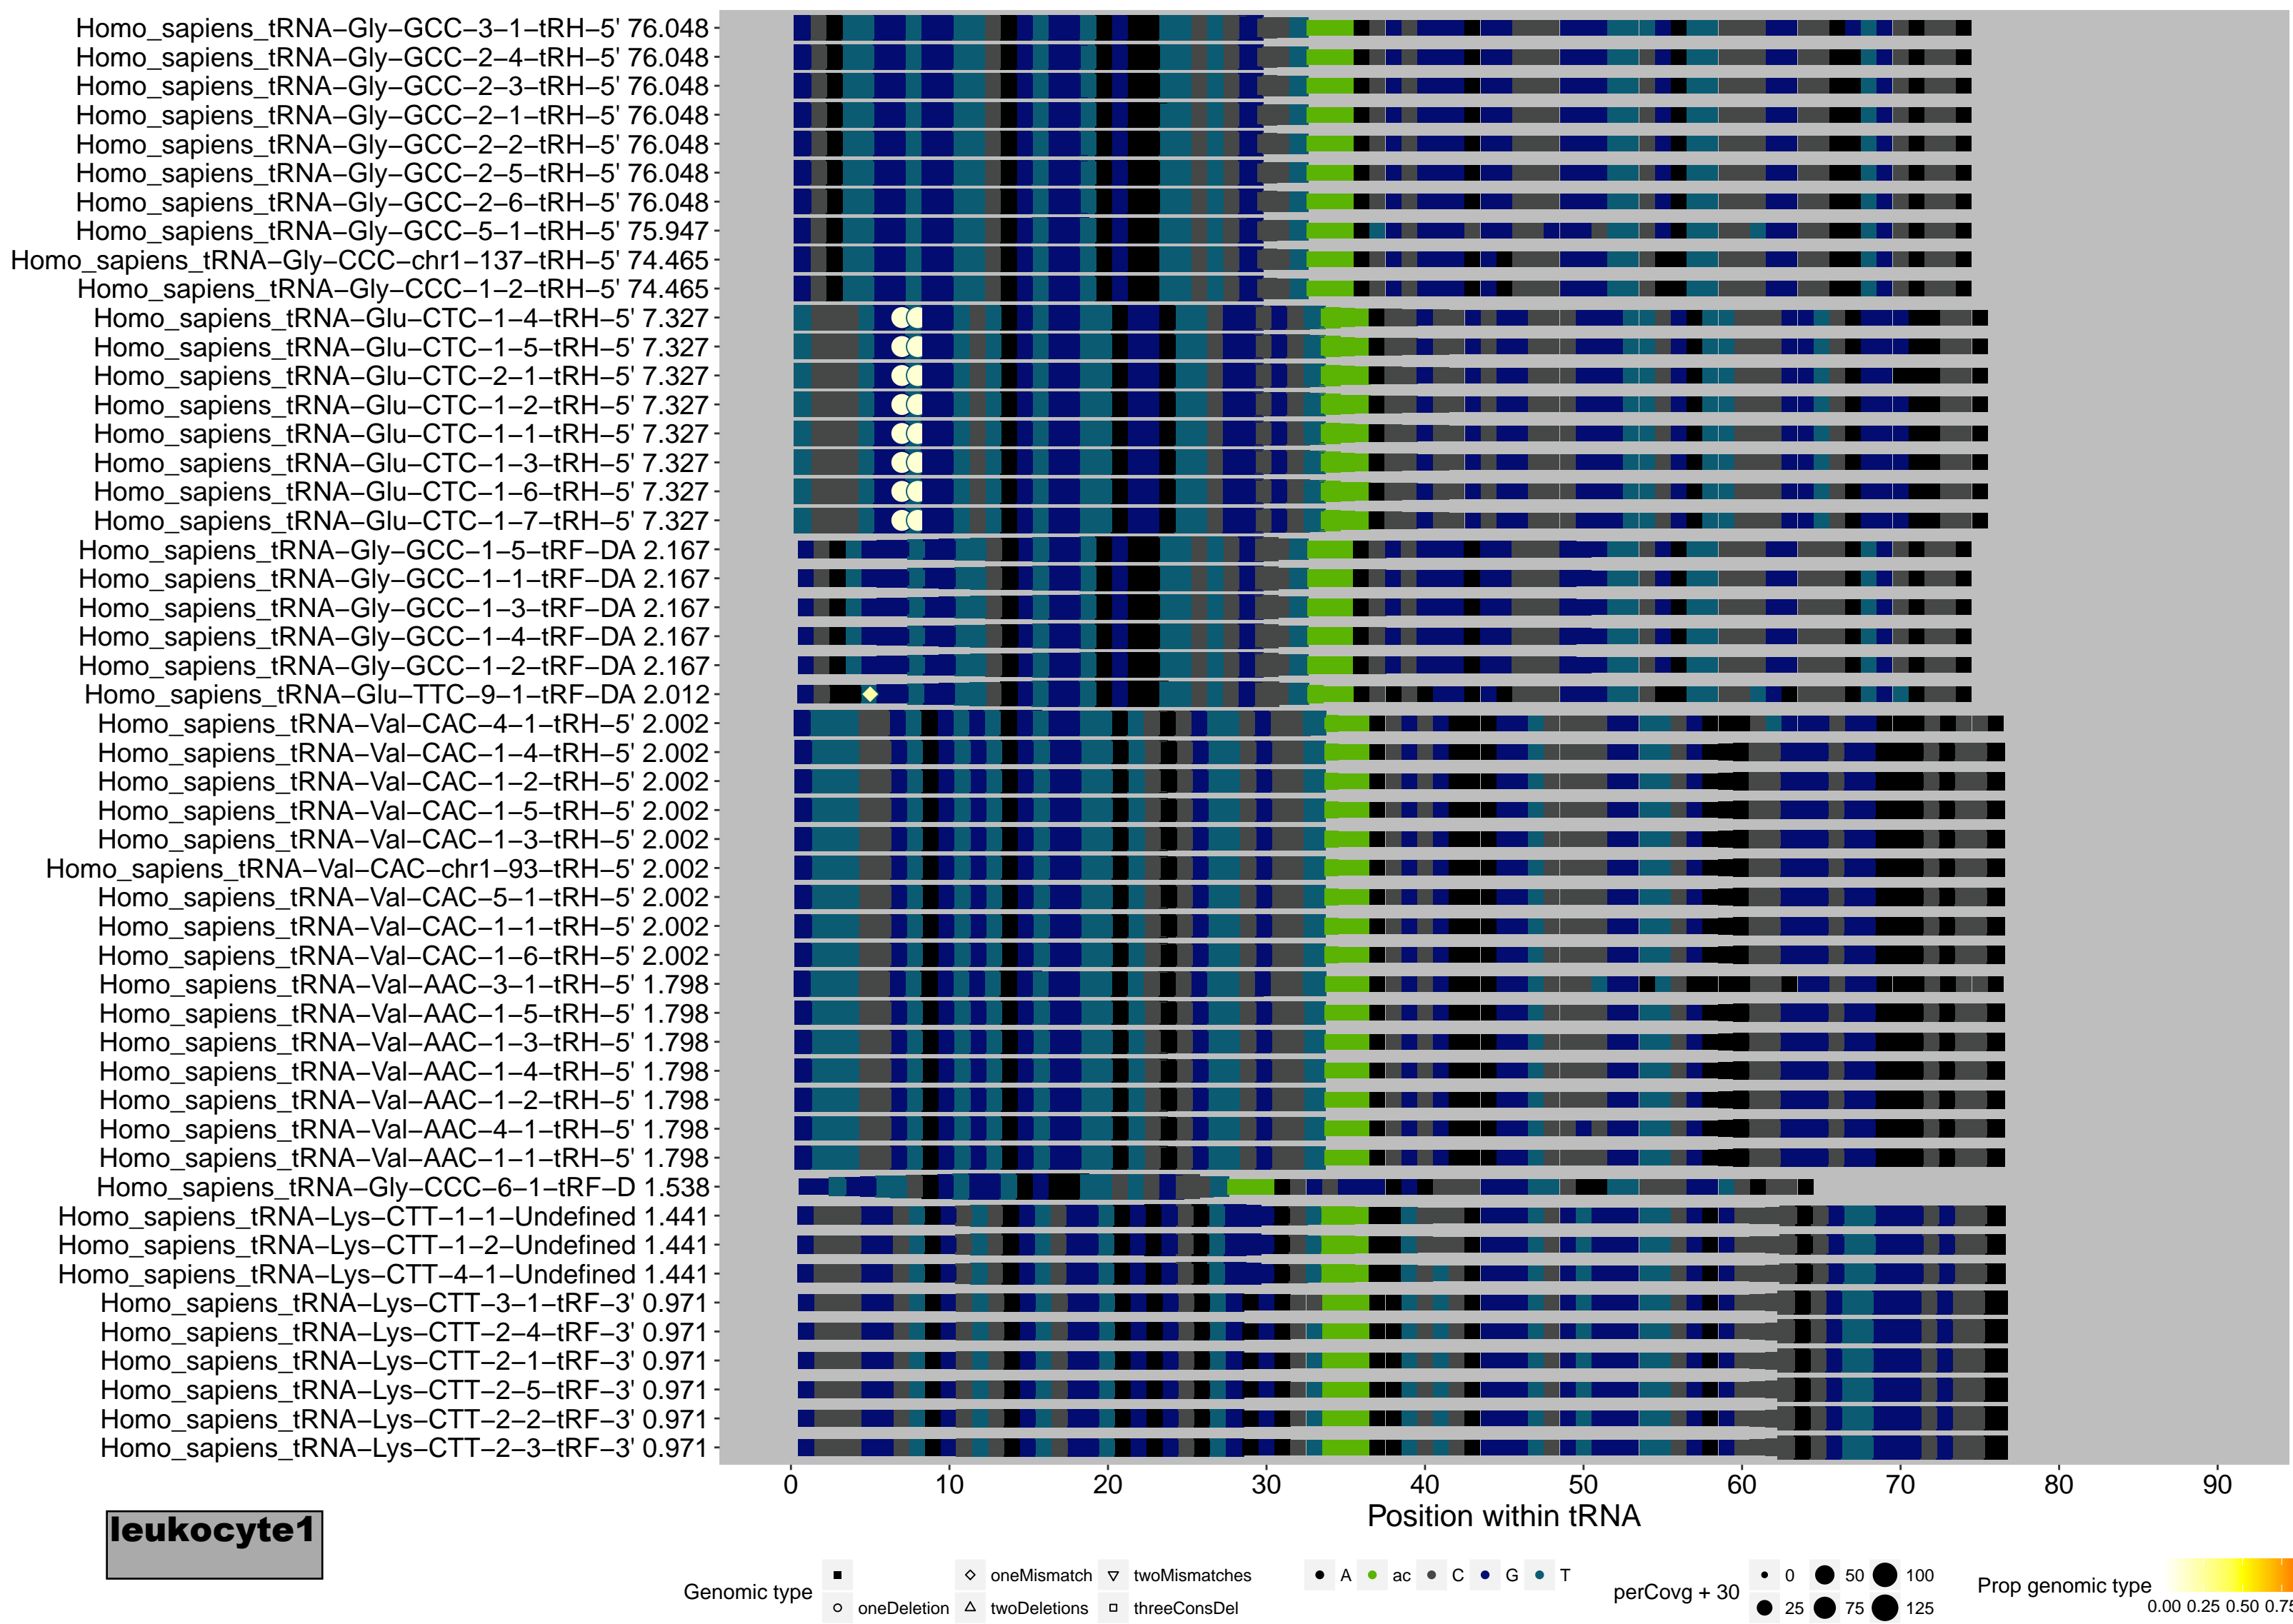

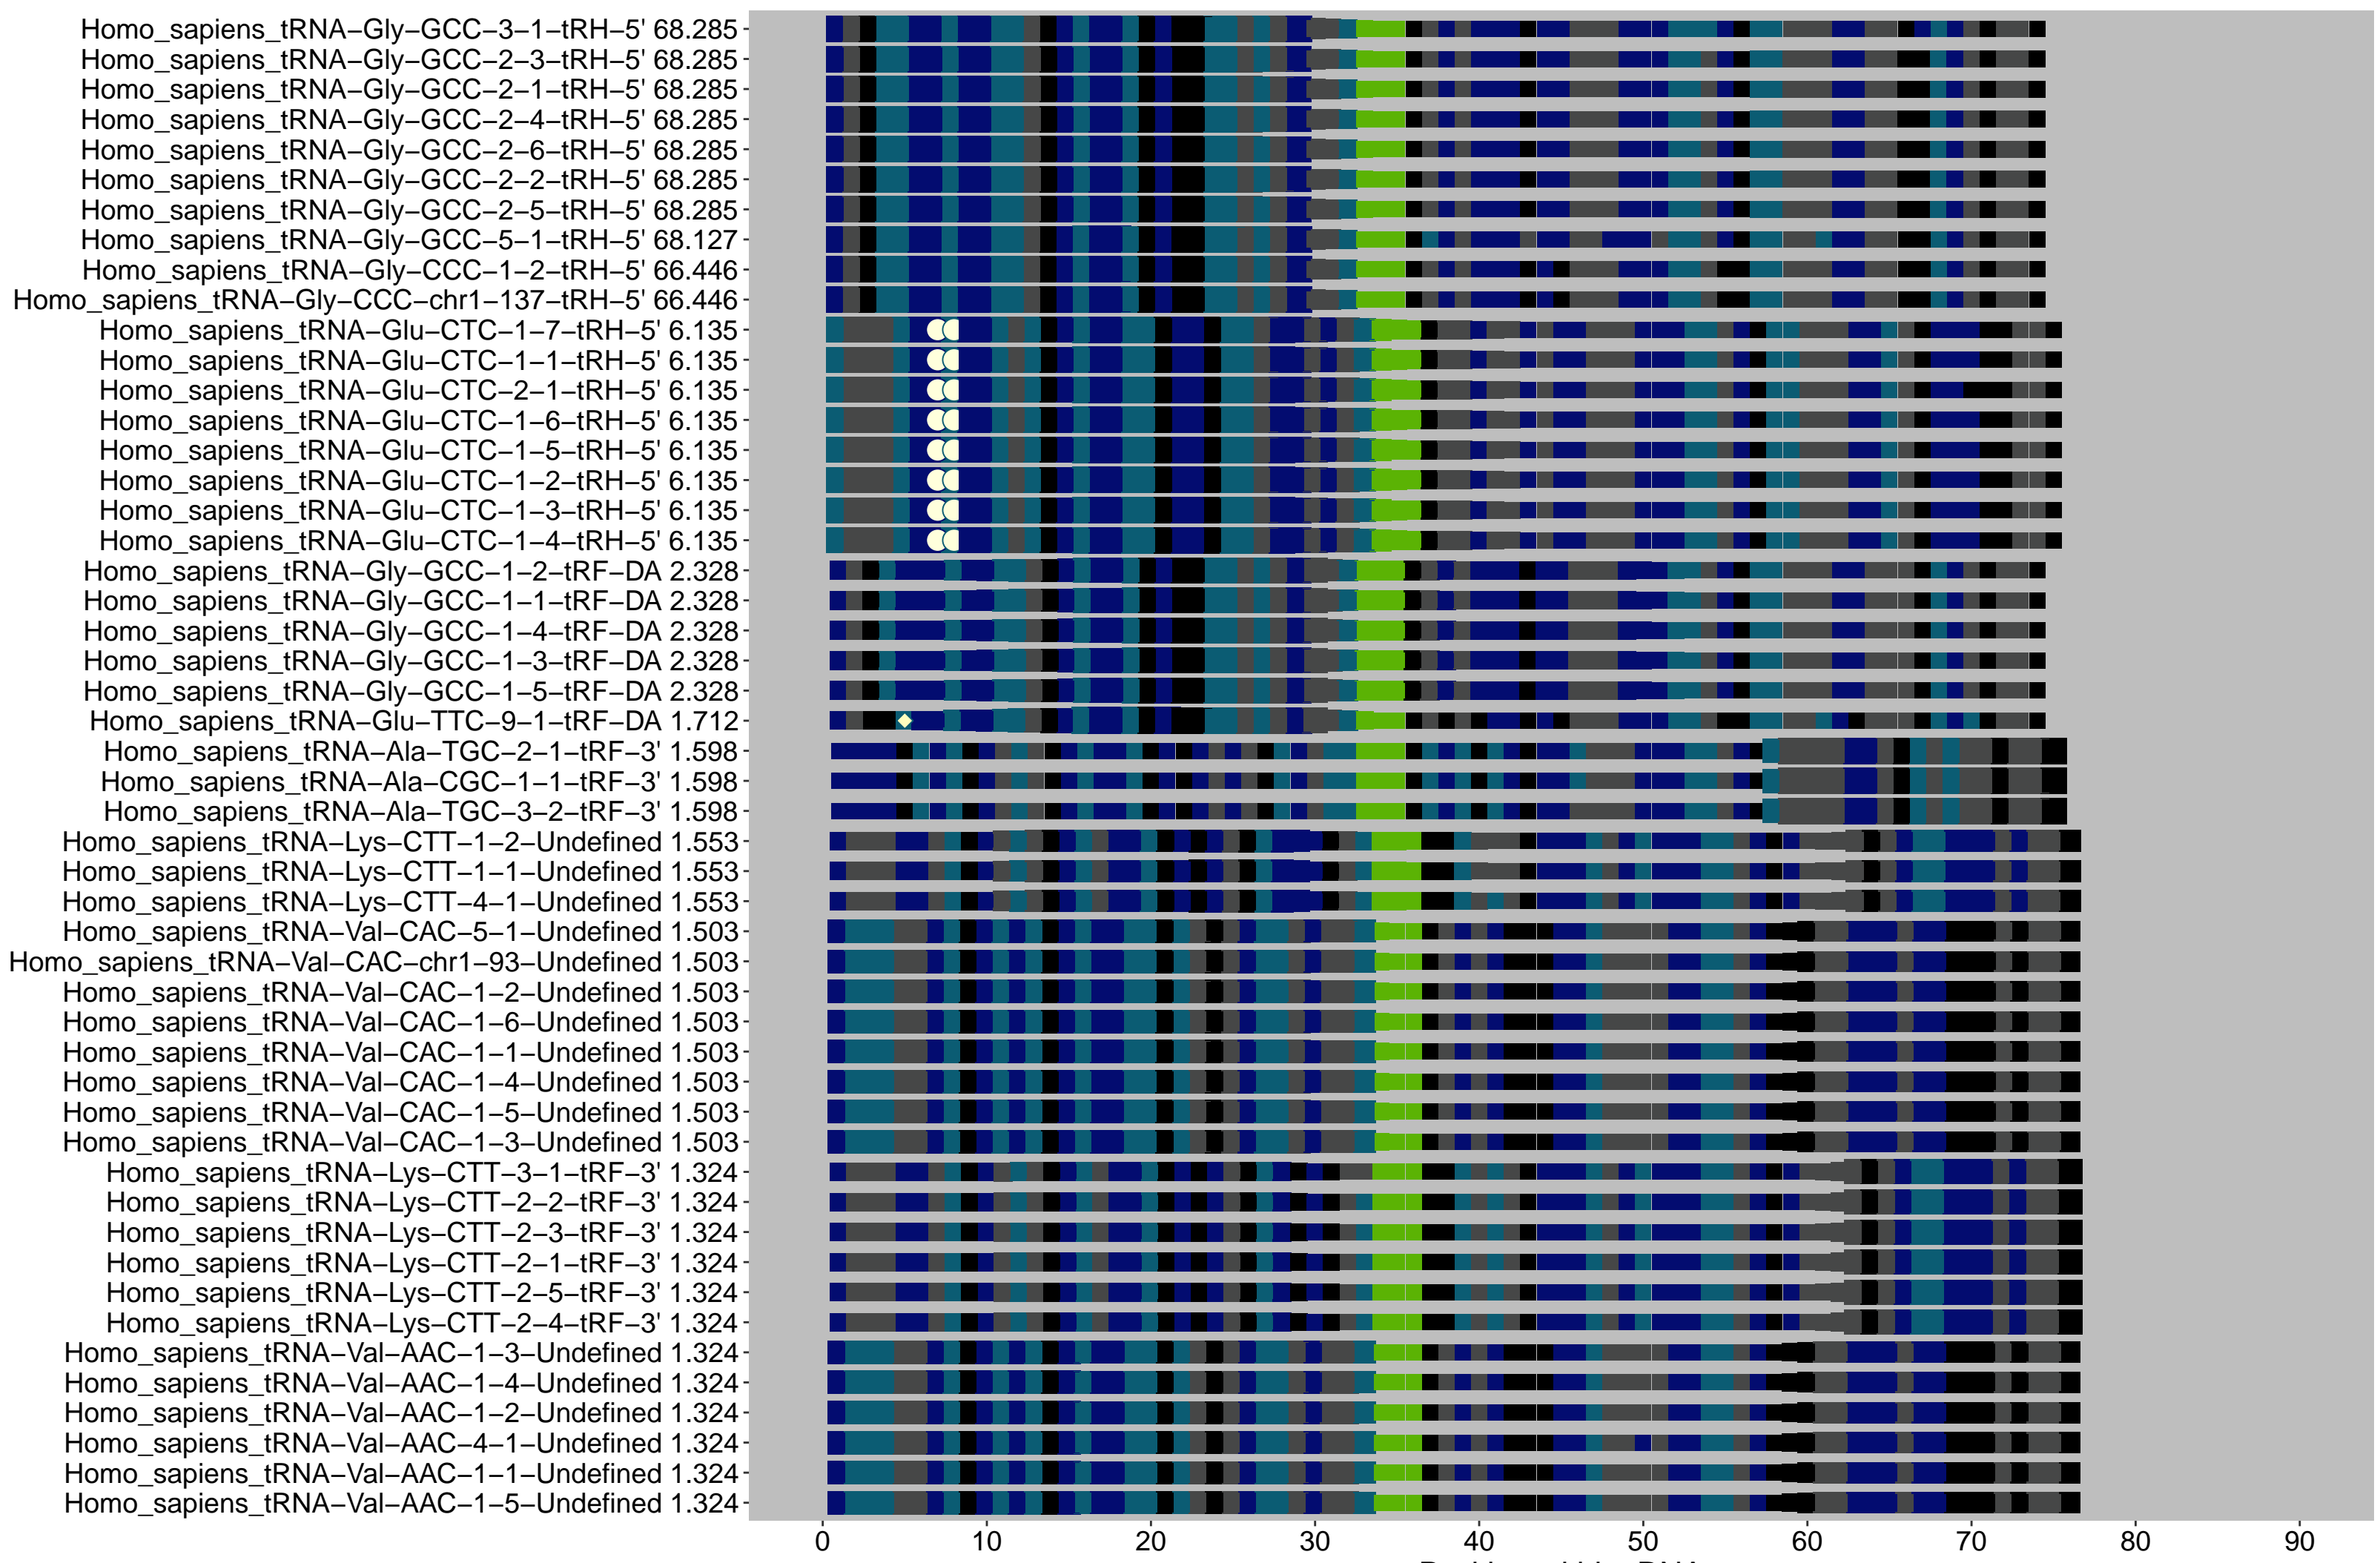

**leukocyte2**

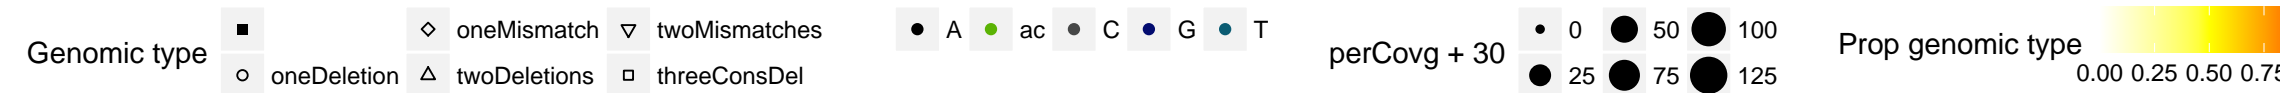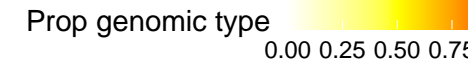

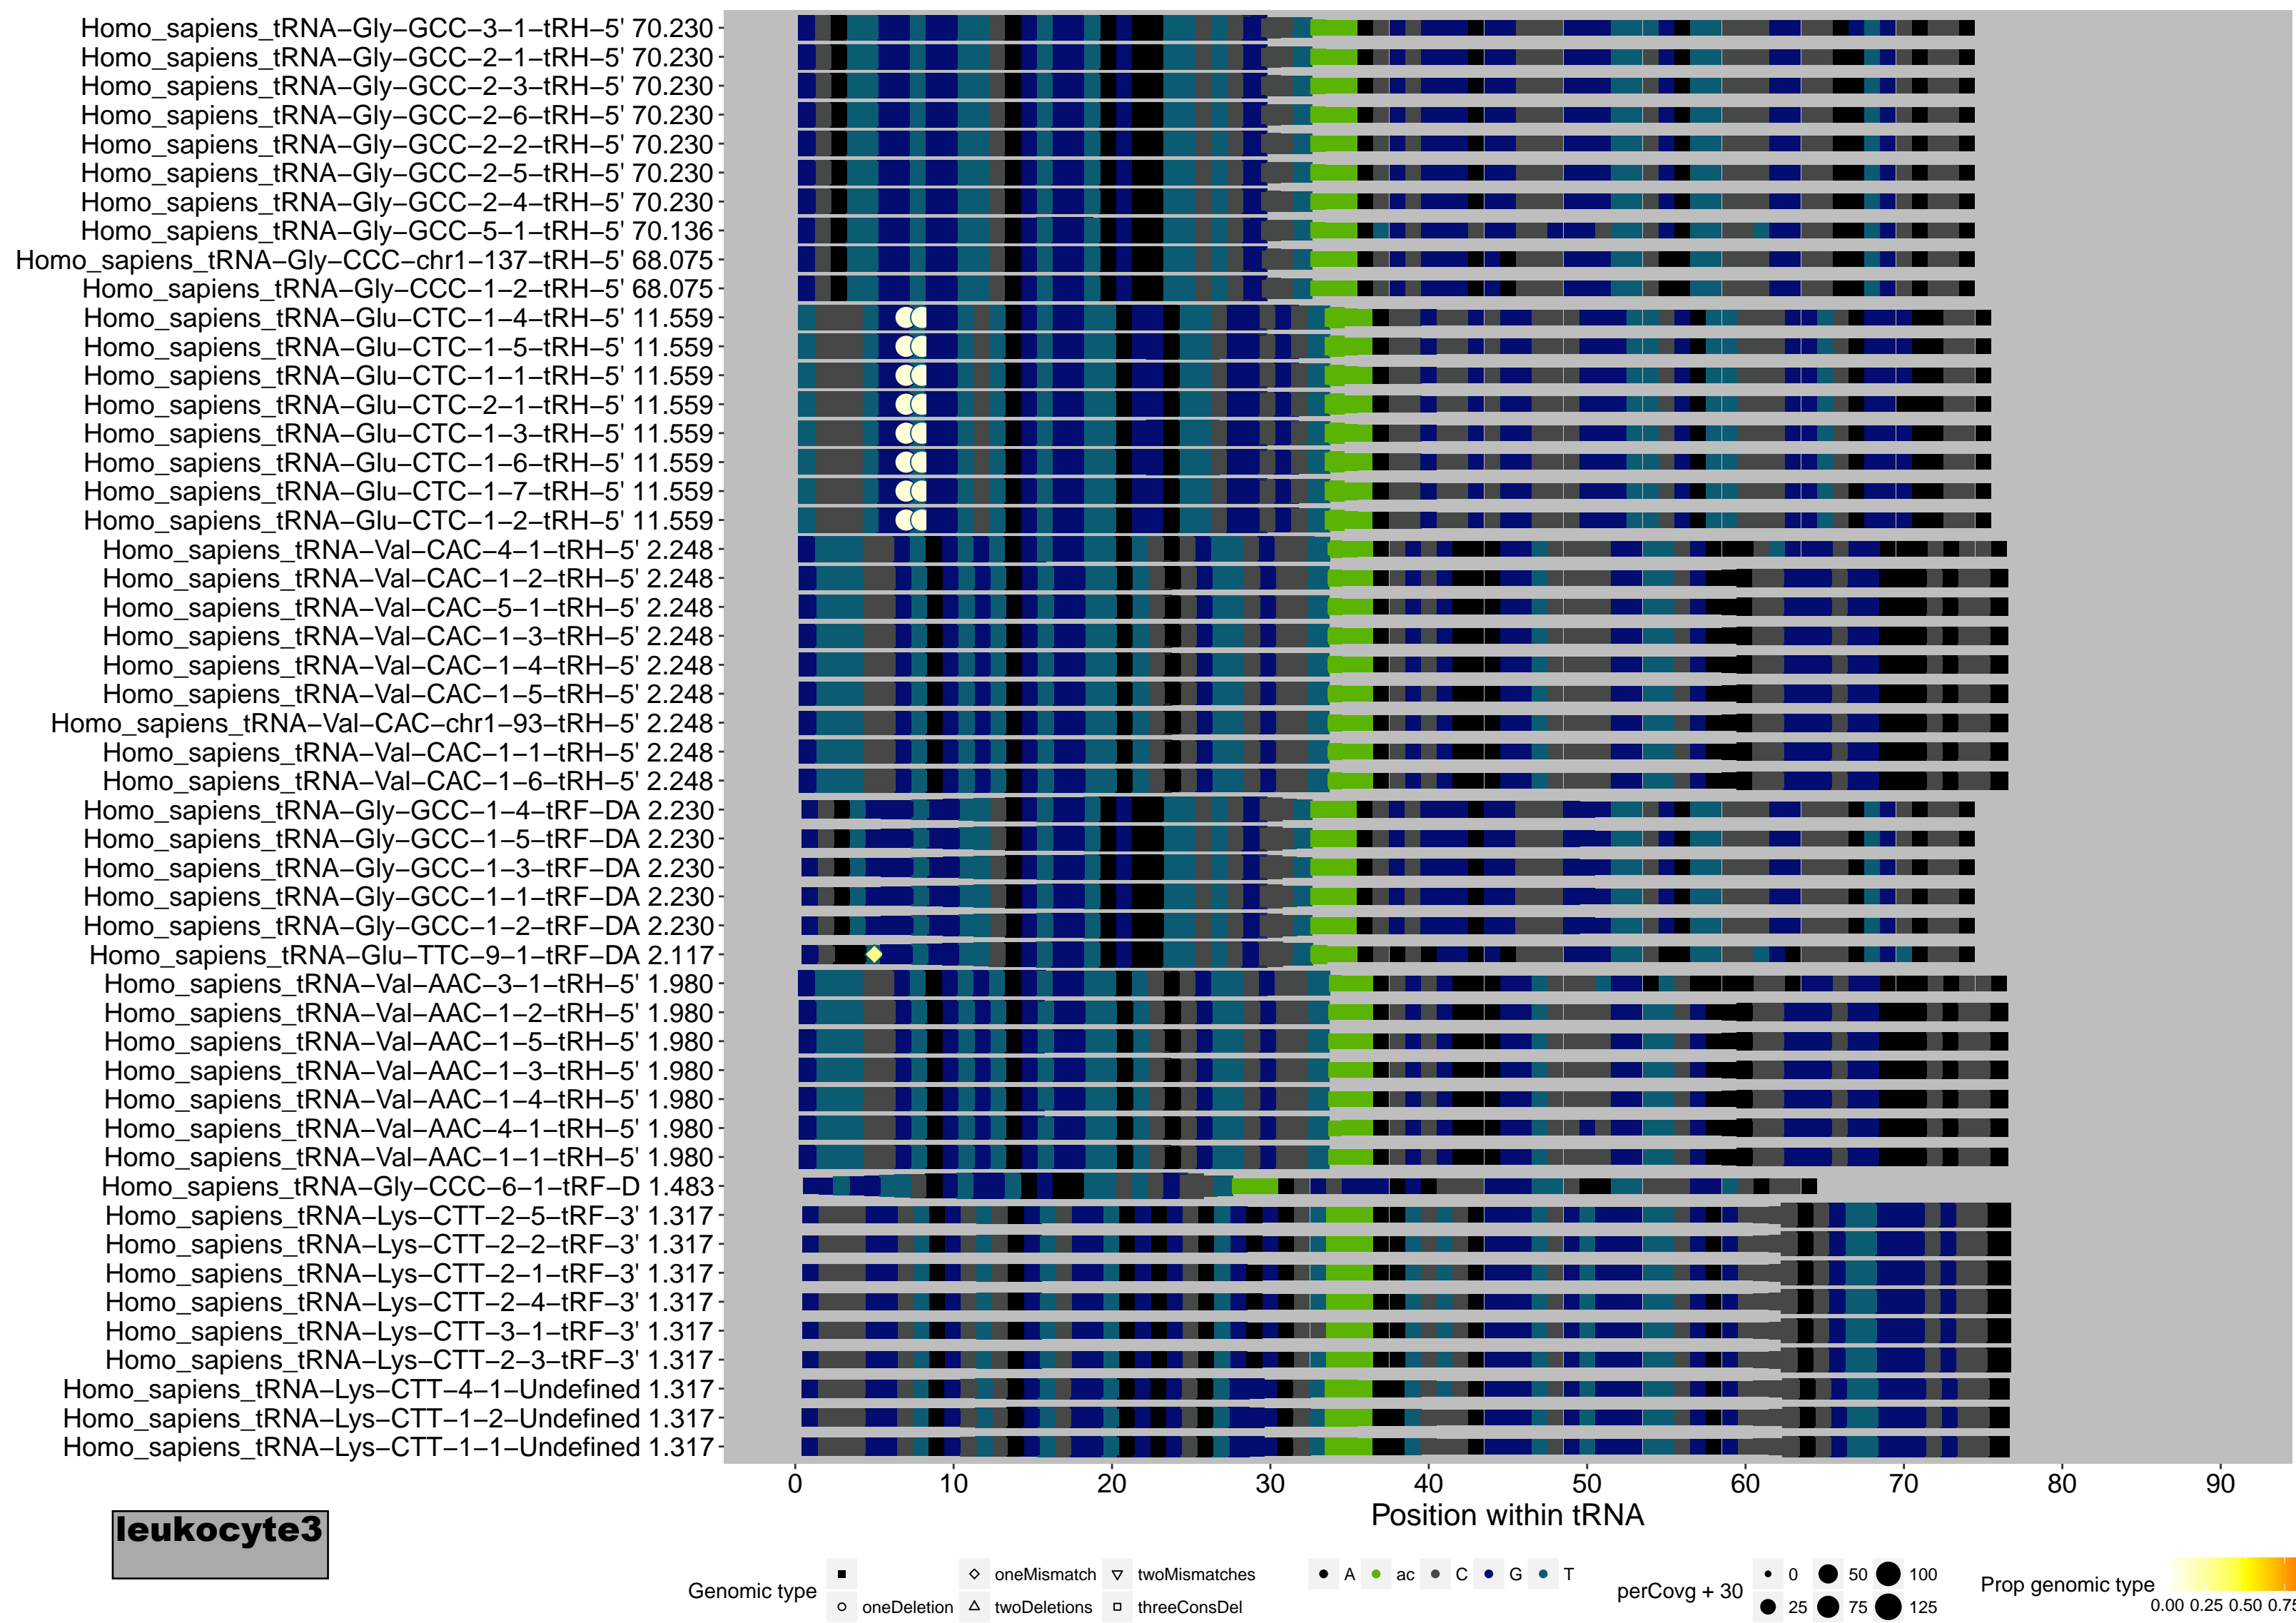

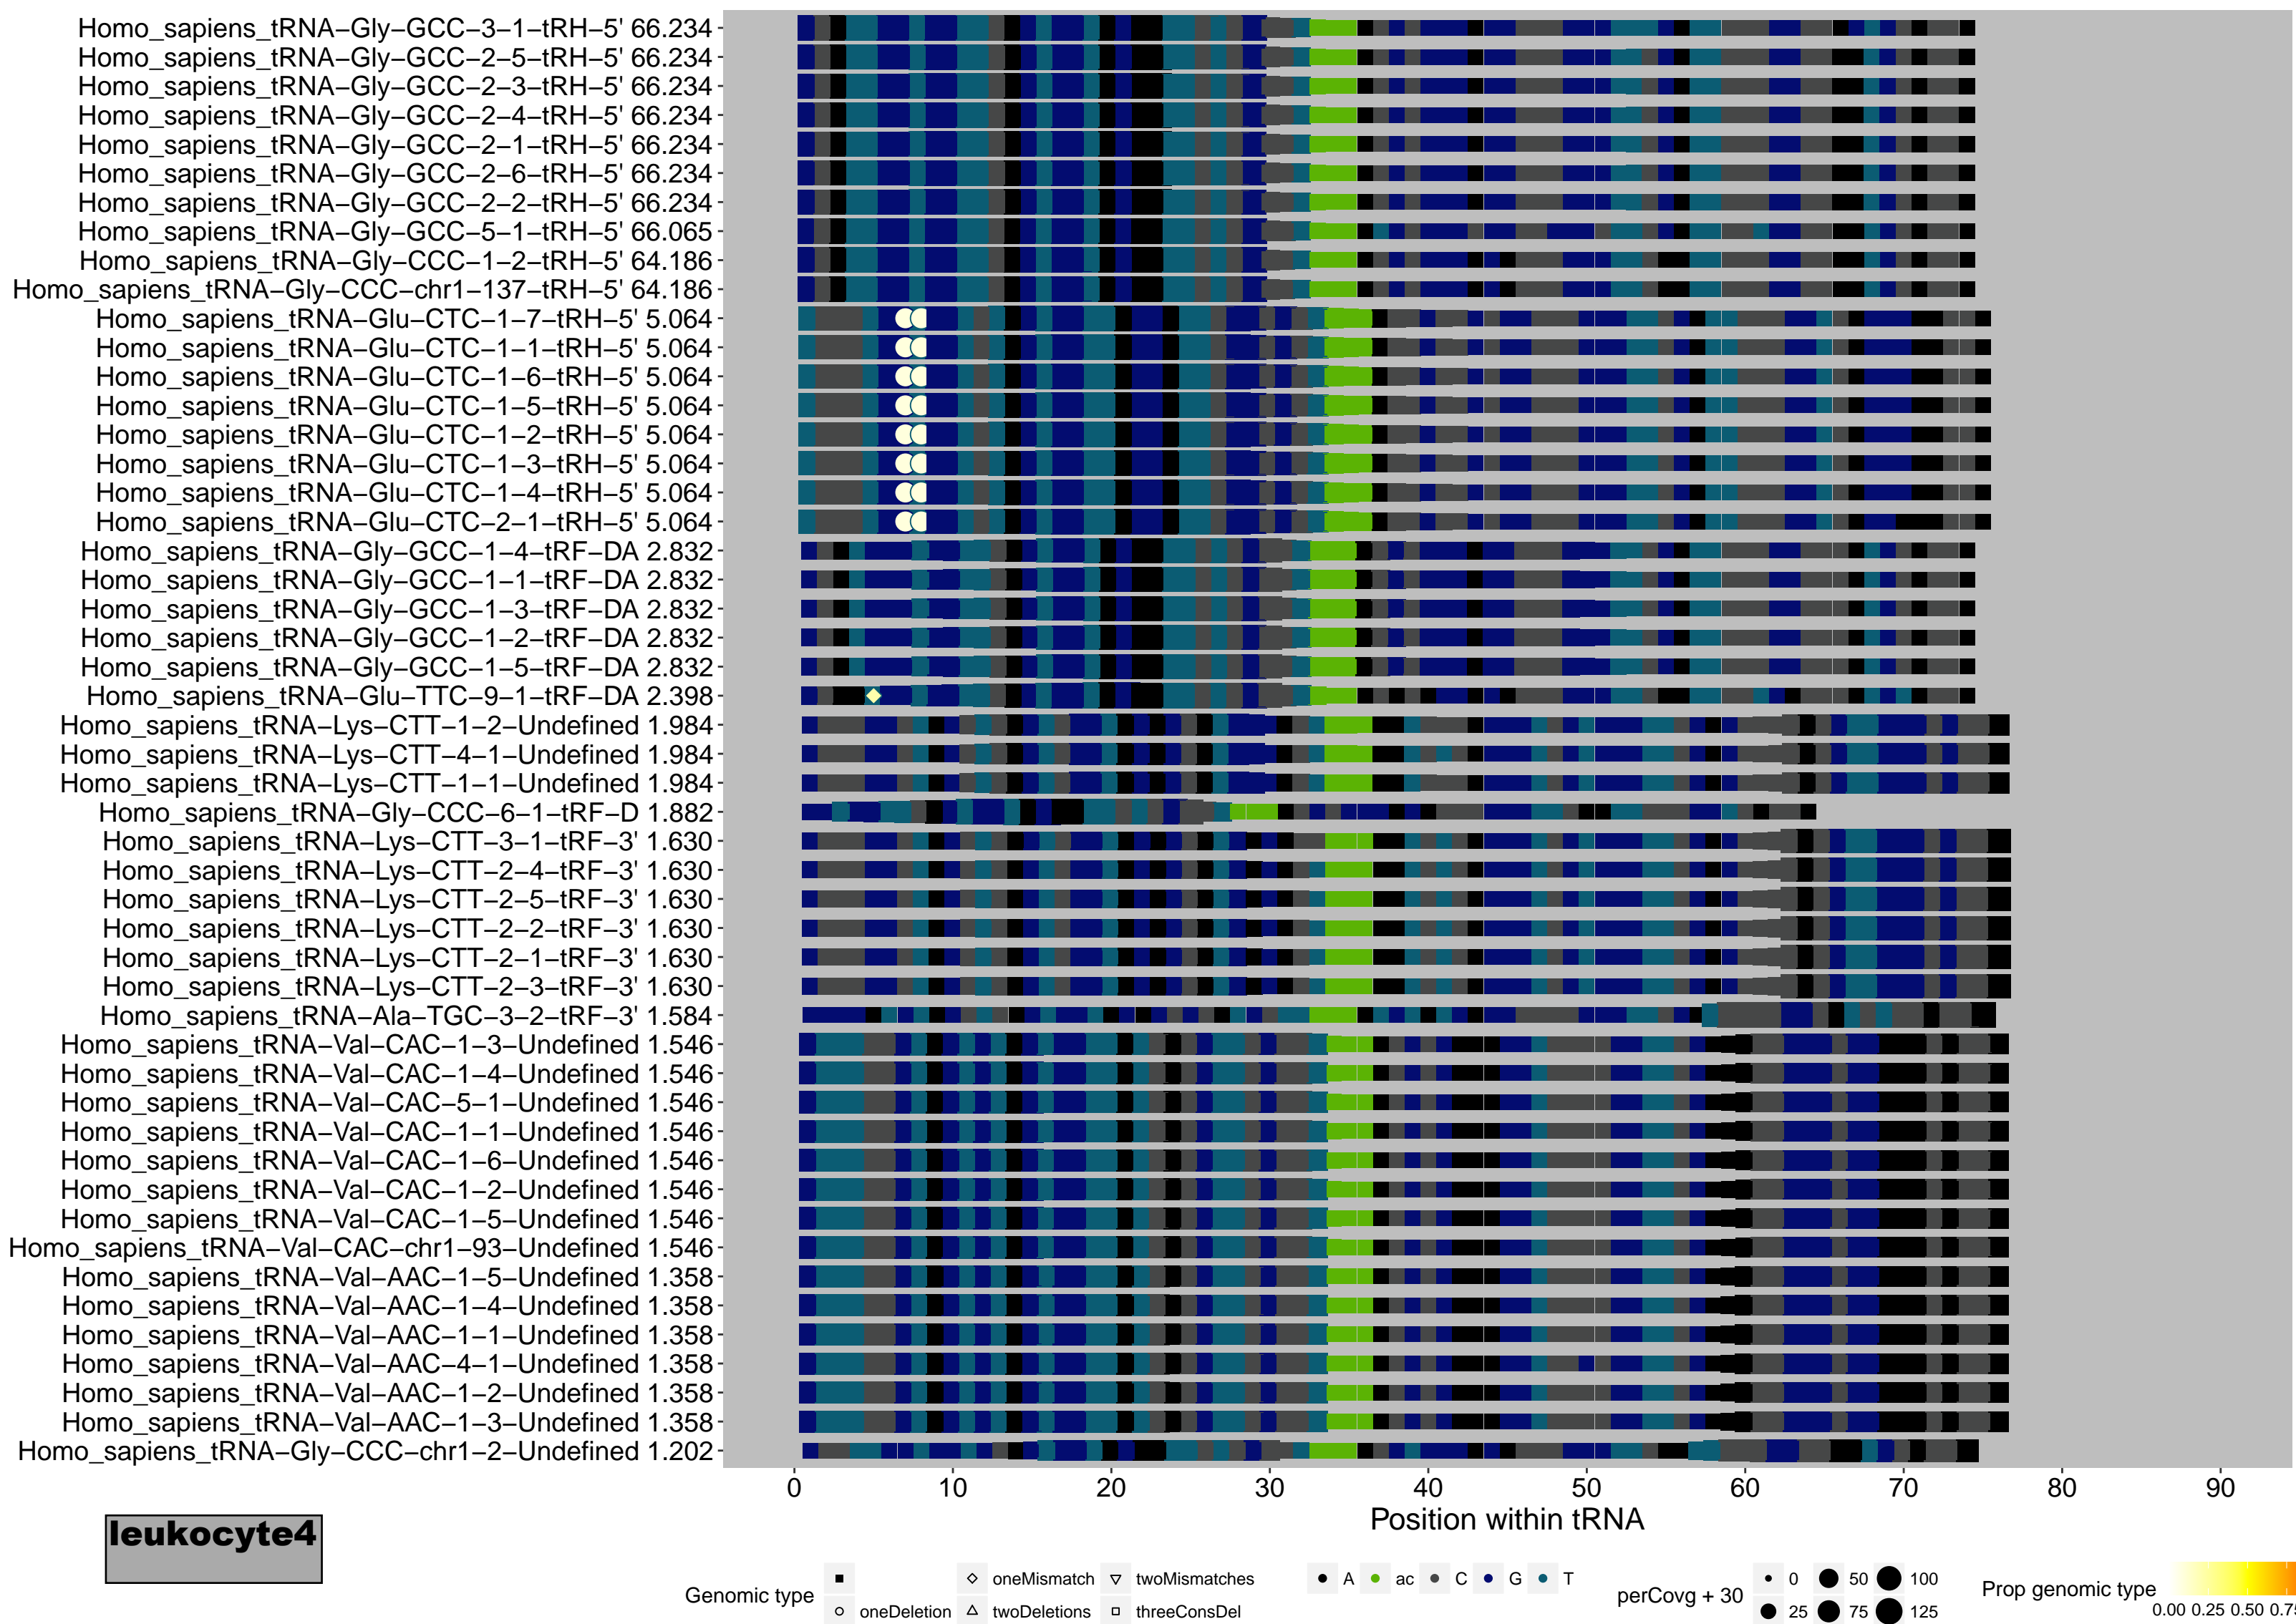



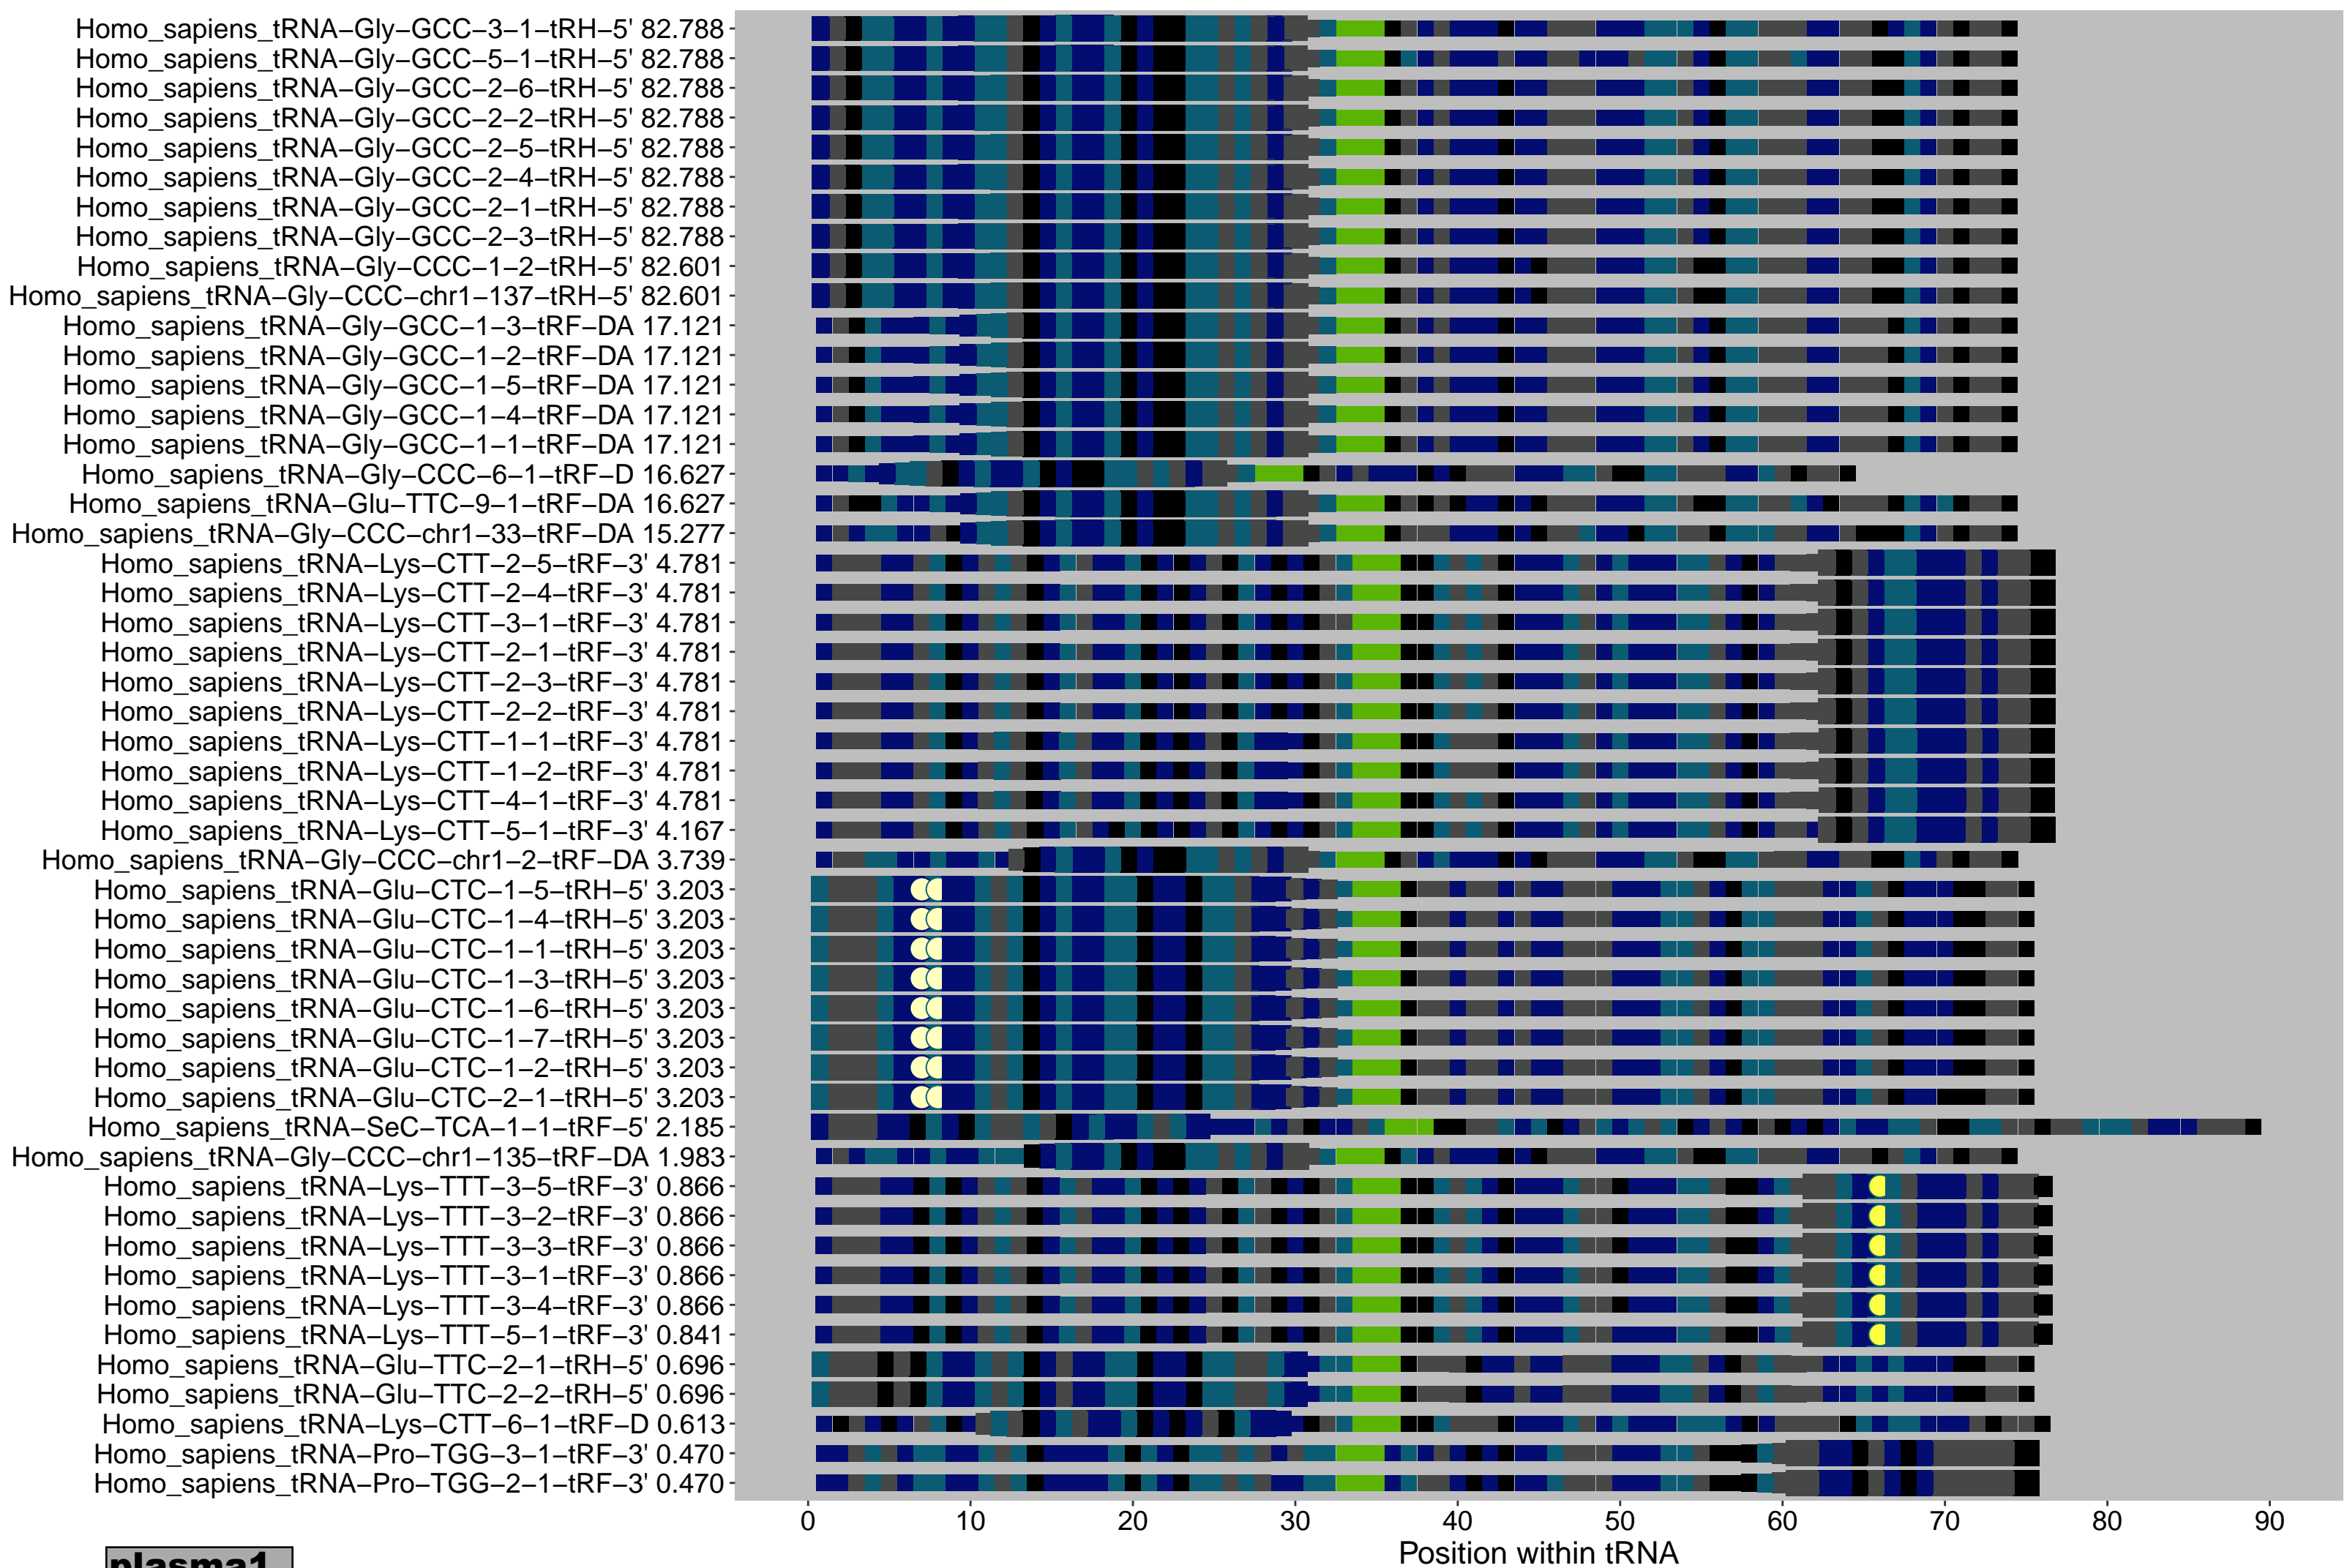

Homo\_sapiens\_tRNA-Gly-GCC-3-1-tRH-5' 82.788  
Homo\_sapiens\_tRNA-Gly-GCC-5-1-tRH-5' 82.788  
Homo\_sapiens\_tRNA-Gly-GCC-2-6-tRH-5' 82.788  
Homo\_sapiens\_tRNA-Gly-GCC-2-2-tRH-5' 82.788  
Homo\_sapiens\_tRNA-Gly-GCC-2-5-tRH-5' 82.788  
Homo\_sapiens\_tRNA-Gly-GCC-2-4-tRH-5' 82.788  
Homo\_sapiens\_tRNA-Gly-GCC-2-1-tRH-5' 82.788  
Homo\_sapiens\_tRNA-Gly-GCC-2-3-tRH-5' 82.788  
Homo\_sapiens\_tRNA-Gly-CCC-1-2-tRH-5' 82.601  
Homo\_sapiens\_tRNA-Gly-CCC-chr1-137-tRH-5' 82.601  
Homo\_sapiens\_tRNA-Gly-GCC-1-3-tRF-DA 17.121  
Homo\_sapiens\_tRNA-Gly-GCC-1-2-tRF-DA 17.121  
Homo\_sapiens\_tRNA-Gly-GCC-1-5-tRF-DA 17.121  
Homo\_sapiens\_tRNA-Gly-GCC-1-4-tRF-DA 17.121  
Homo\_sapiens\_tRNA-Gly-GCC-1-1-tRF-DA 17.121  
Homo\_sapiens\_tRNA-Gly-CCC-6-1-tRF-D 16.627  
Homo\_sapiens\_tRNA-Glu-TTC-9-1-tRF-DA 16.627  
Homo\_sapiens\_tRNA-Gly-CCC-chr1-33-tRF-DA 15.277  
Homo\_sapiens\_tRNA-Lys-CTT-2-5-tRF-3' 4.781  
Homo\_sapiens\_tRNA-Lys-CTT-2-4-tRF-3' 4.781  
Homo\_sapiens\_tRNA-Lys-CTT-3-1-tRF-3' 4.781  
Homo\_sapiens\_tRNA-Lys-CTT-2-1-tRF-3' 4.781  
Homo\_sapiens\_tRNA-Lys-CTT-2-3-tRF-3' 4.781  
Homo\_sapiens\_tRNA-Lys-CTT-2-2-tRF-3' 4.781  
Homo\_sapiens\_tRNA-Lys-CTT-1-1-tRF-3' 4.781  
Homo\_sapiens\_tRNA-Lys-CTT-1-2-tRF-3' 4.781  
Homo\_sapiens\_tRNA-Lys-CTT-4-1-tRF-3' 4.781  
Homo\_sapiens\_tRNA-Lys-CTT-5-1-tRF-3' 4.167  
Homo\_sapiens\_tRNA-Gly-CCC-chr1-2-tRF-DA 3.739  
Homo\_sapiens\_tRNA-Glu-CTC-1-5-tRH-5' 3.203  
Homo\_sapiens\_tRNA-Glu-CTC-1-4-tRH-5' 3.203  
Homo\_sapiens\_tRNA-Glu-CTC-1-1-tRH-5' 3.203  
Homo\_sapiens\_tRNA-Glu-CTC-1-3-tRH-5' 3.203  
Homo\_sapiens\_tRNA-Glu-CTC-1-6-tRH-5' 3.203  
Homo\_sapiens\_tRNA-Glu-CTC-1-7-tRH-5' 3.203  
Homo\_sapiens\_tRNA-Glu-CTC-1-2-tRH-5' 3.203  
Homo\_sapiens\_tRNA-Glu-CTC-2-1-tRH-5' 3.203  
Homo\_sapiens\_tRNA-SeC-TCA-1-1-tRF-5' 2.185  
Homo\_sapiens\_tRNA-Gly-CCC-chr1-135-tRF-DA 1.983  
Homo\_sapiens\_tRNA-Lys-TTT-3-5-tRF-3' 0.866  
Homo\_sapiens\_tRNA-Lys-TTT-3-2-tRF-3' 0.866  
Homo\_sapiens\_tRNA-Lys-TTT-3-3-tRF-3' 0.866  
Homo\_sapiens\_tRNA-Lys-TTT-3-1-tRF-3' 0.866  
Homo\_sapiens\_tRNA-Lys-TTT-3-4-tRF-3' 0.866  
Homo\_sapiens\_tRNA-Lys-TTT-5-1-tRF-3' 0.841  
Homo\_sapiens\_tRNA-Glu-TTC-2-1-tRH-5' 0.696  
Homo\_sapiens\_tRNA-Glu-TTC-2-2-tRH-5' 0.696  
Homo\_sapiens\_tRNA-Lys-CTT-6-1-tRF-D 0.613  
Homo\_sapiens\_tRNA-Pro-TGG-3-1-tRF-3' 0.470  
Homo\_sapiens\_tRNA-Pro-TGG-2-1-tRF-3' 0.470

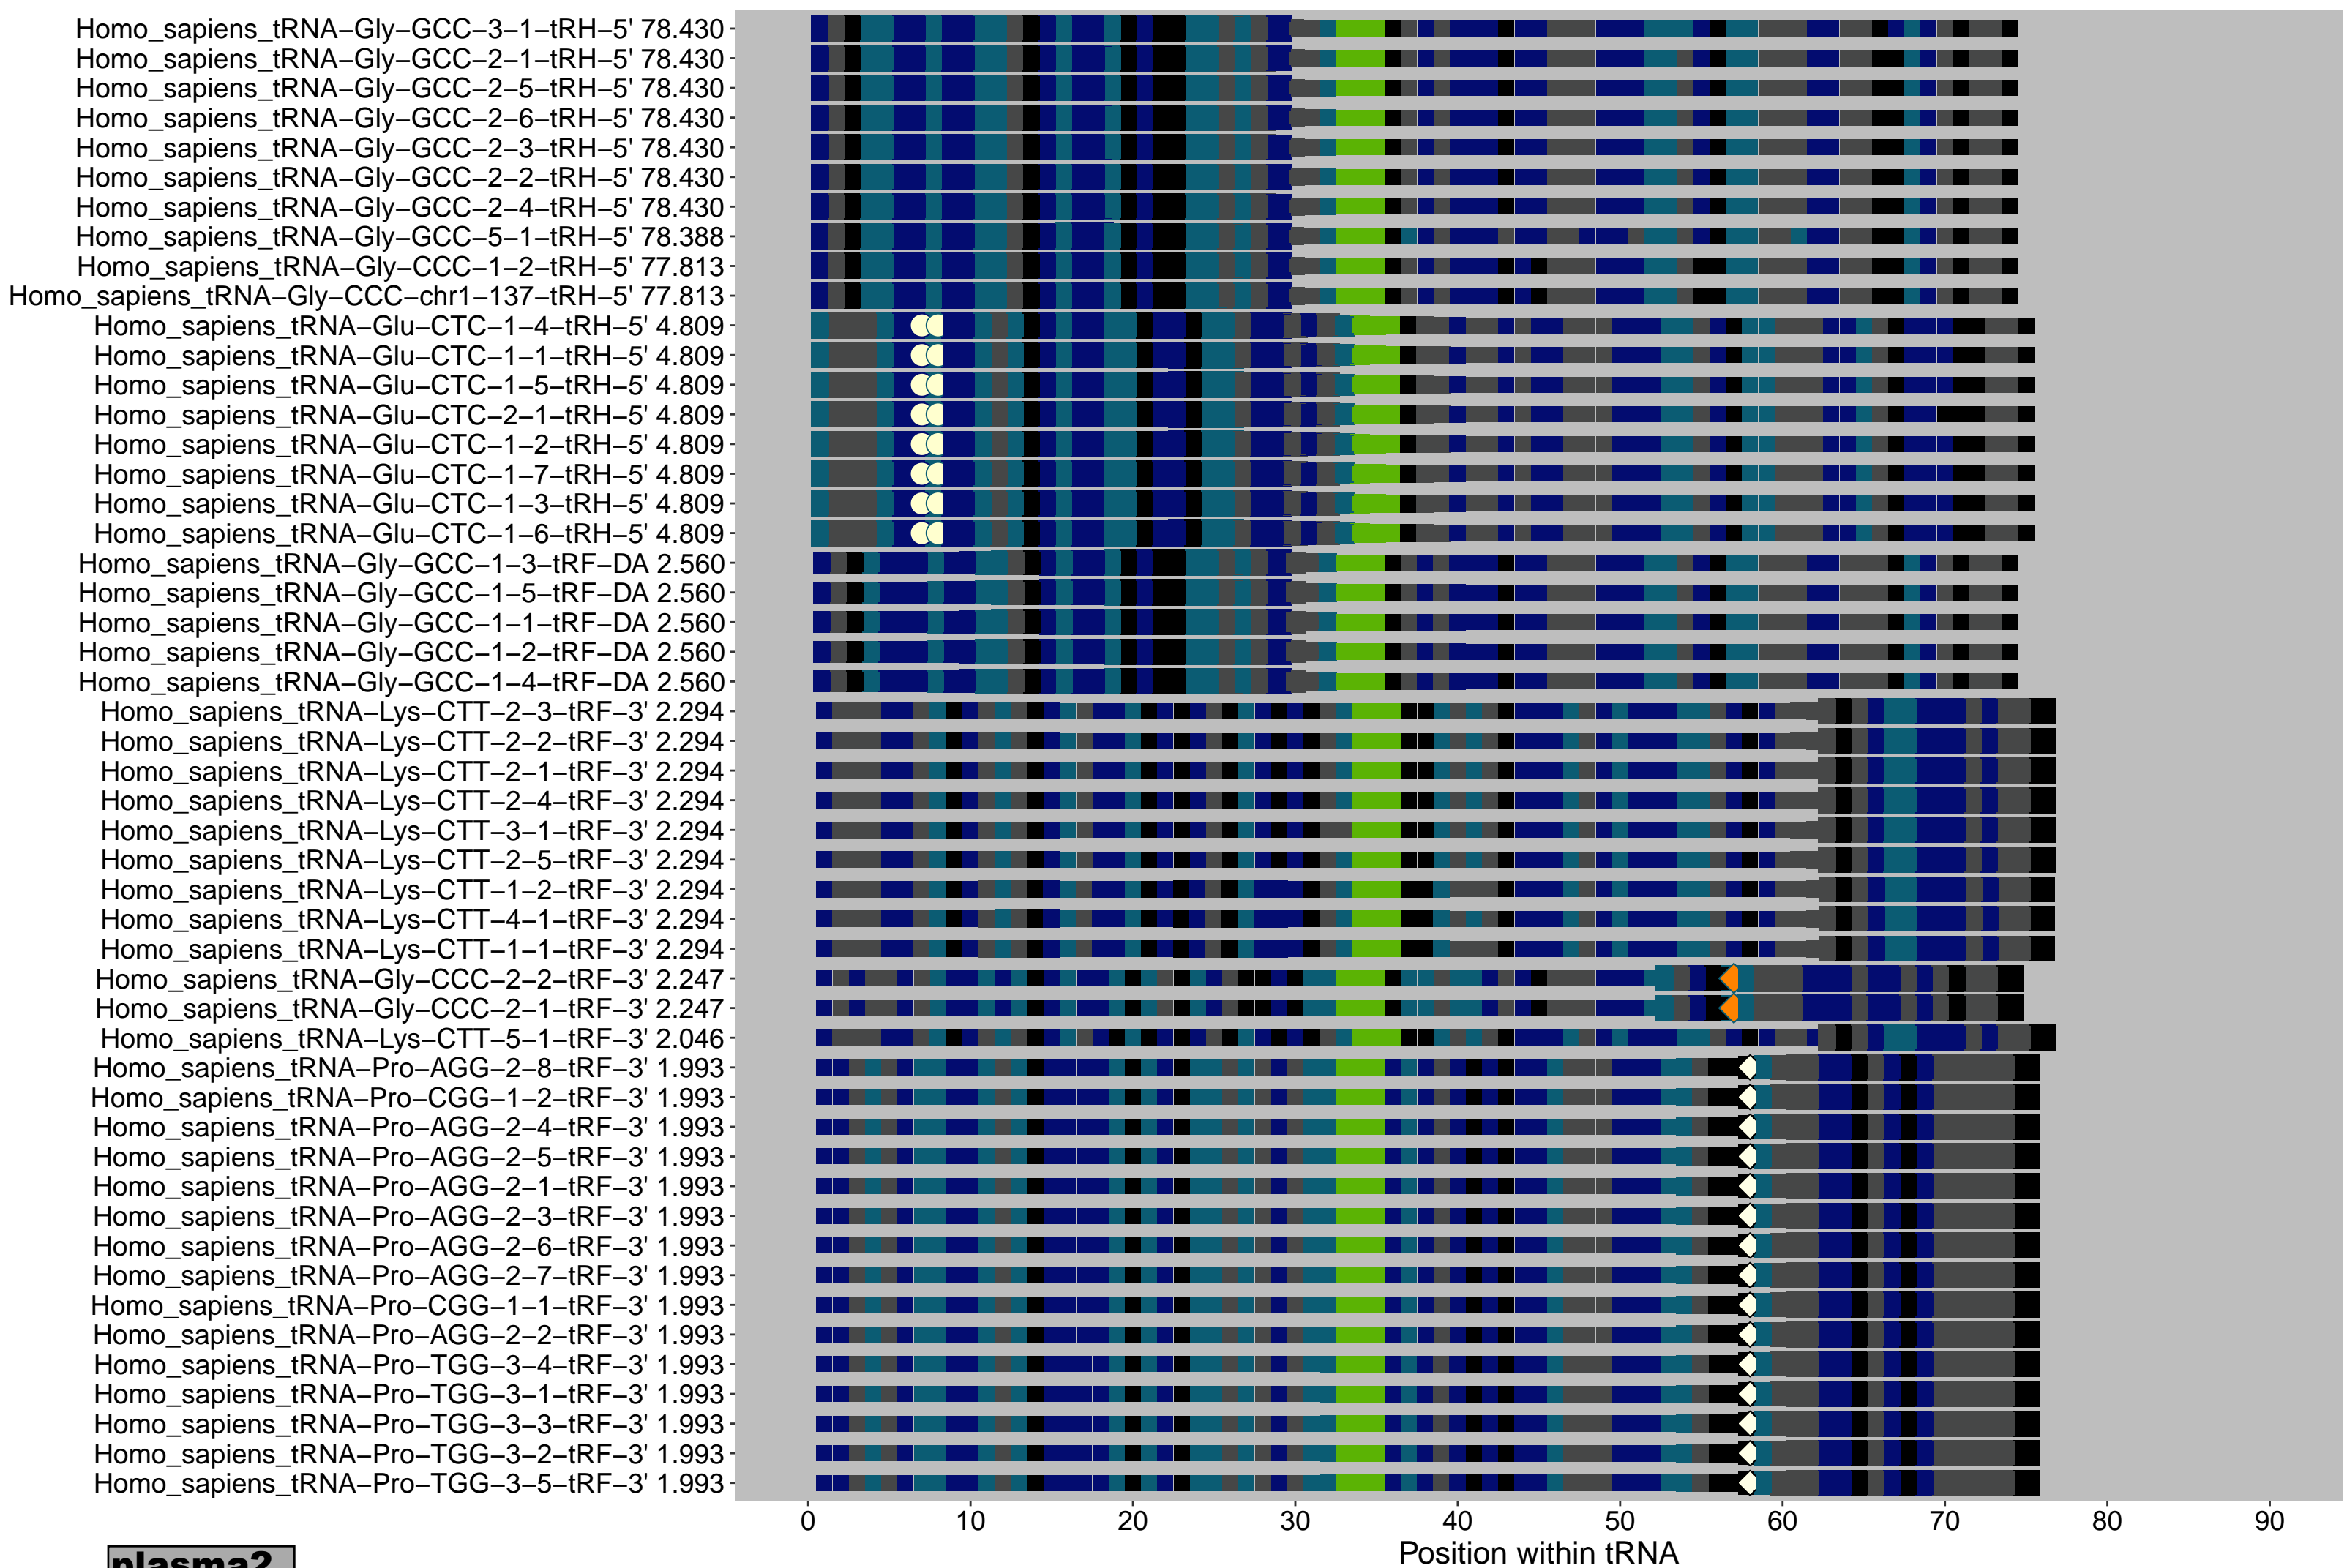

**plasma2**

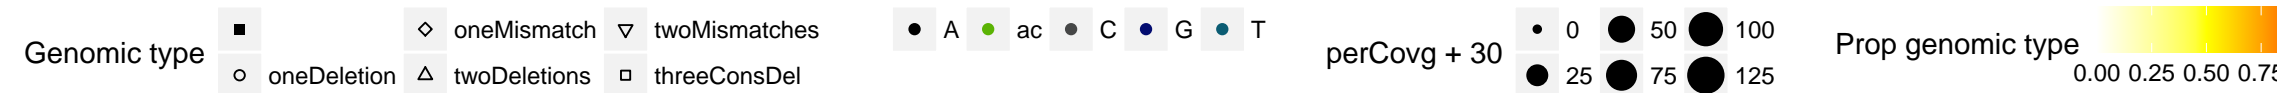

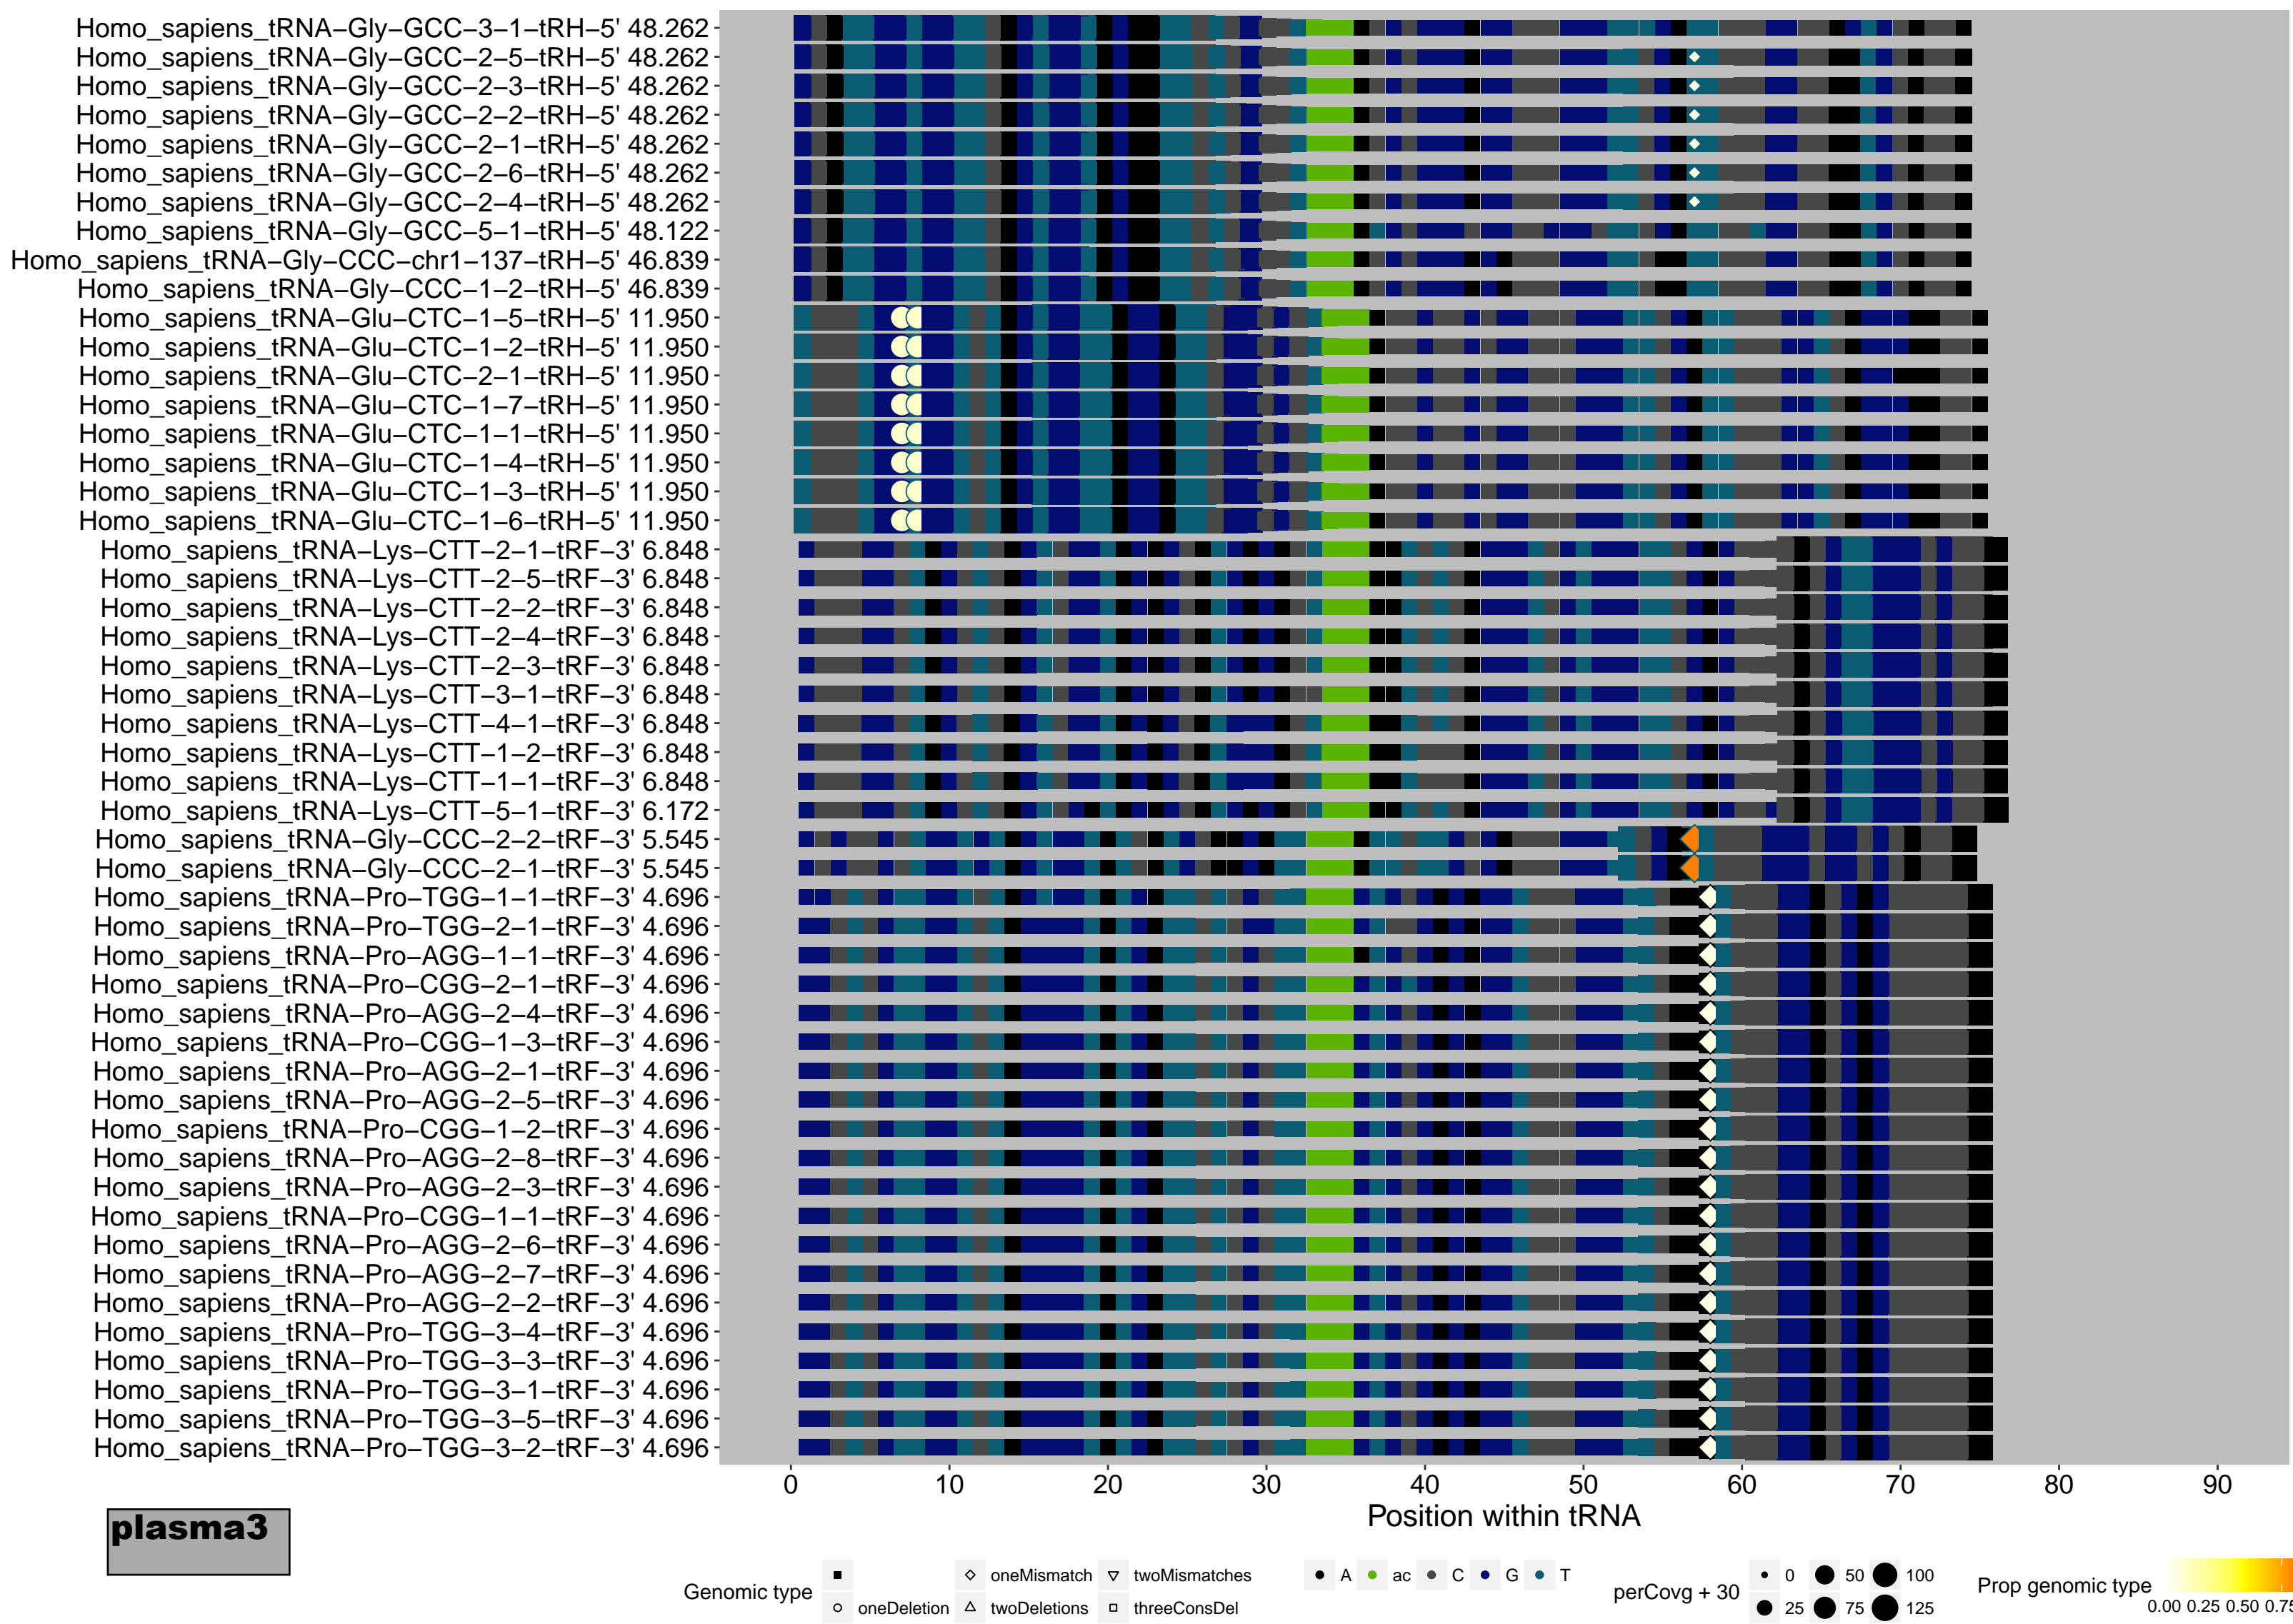

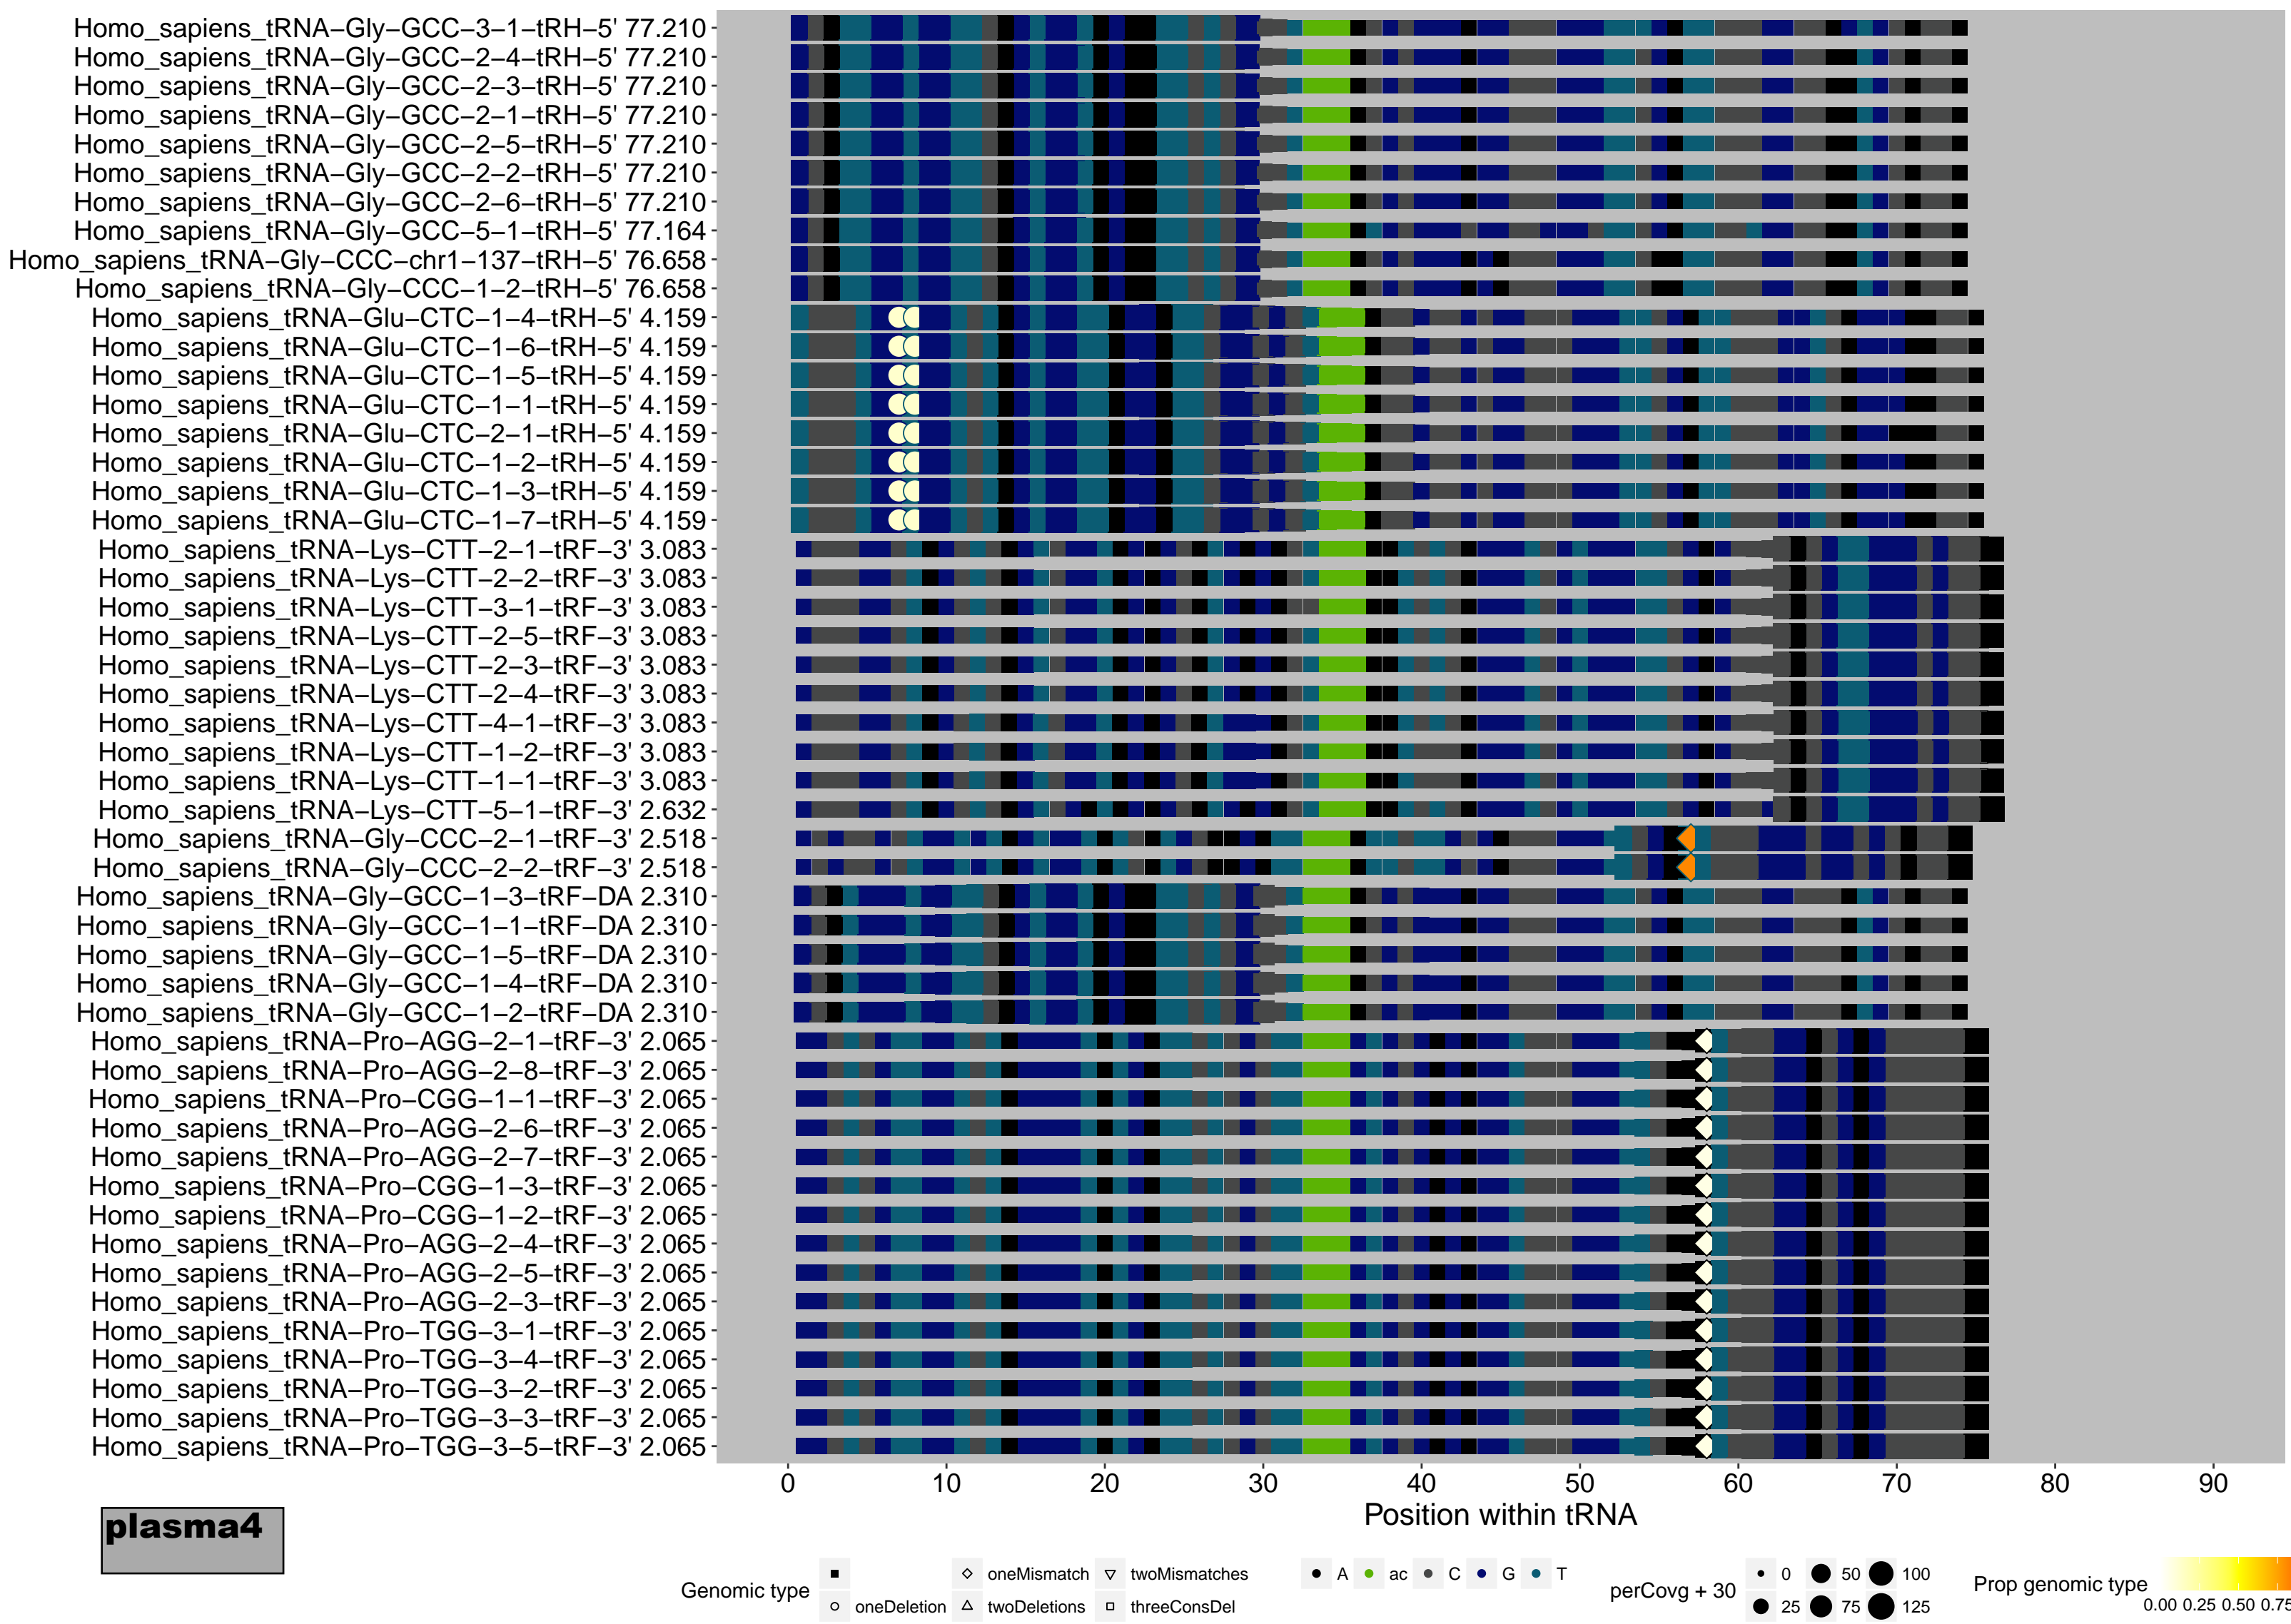

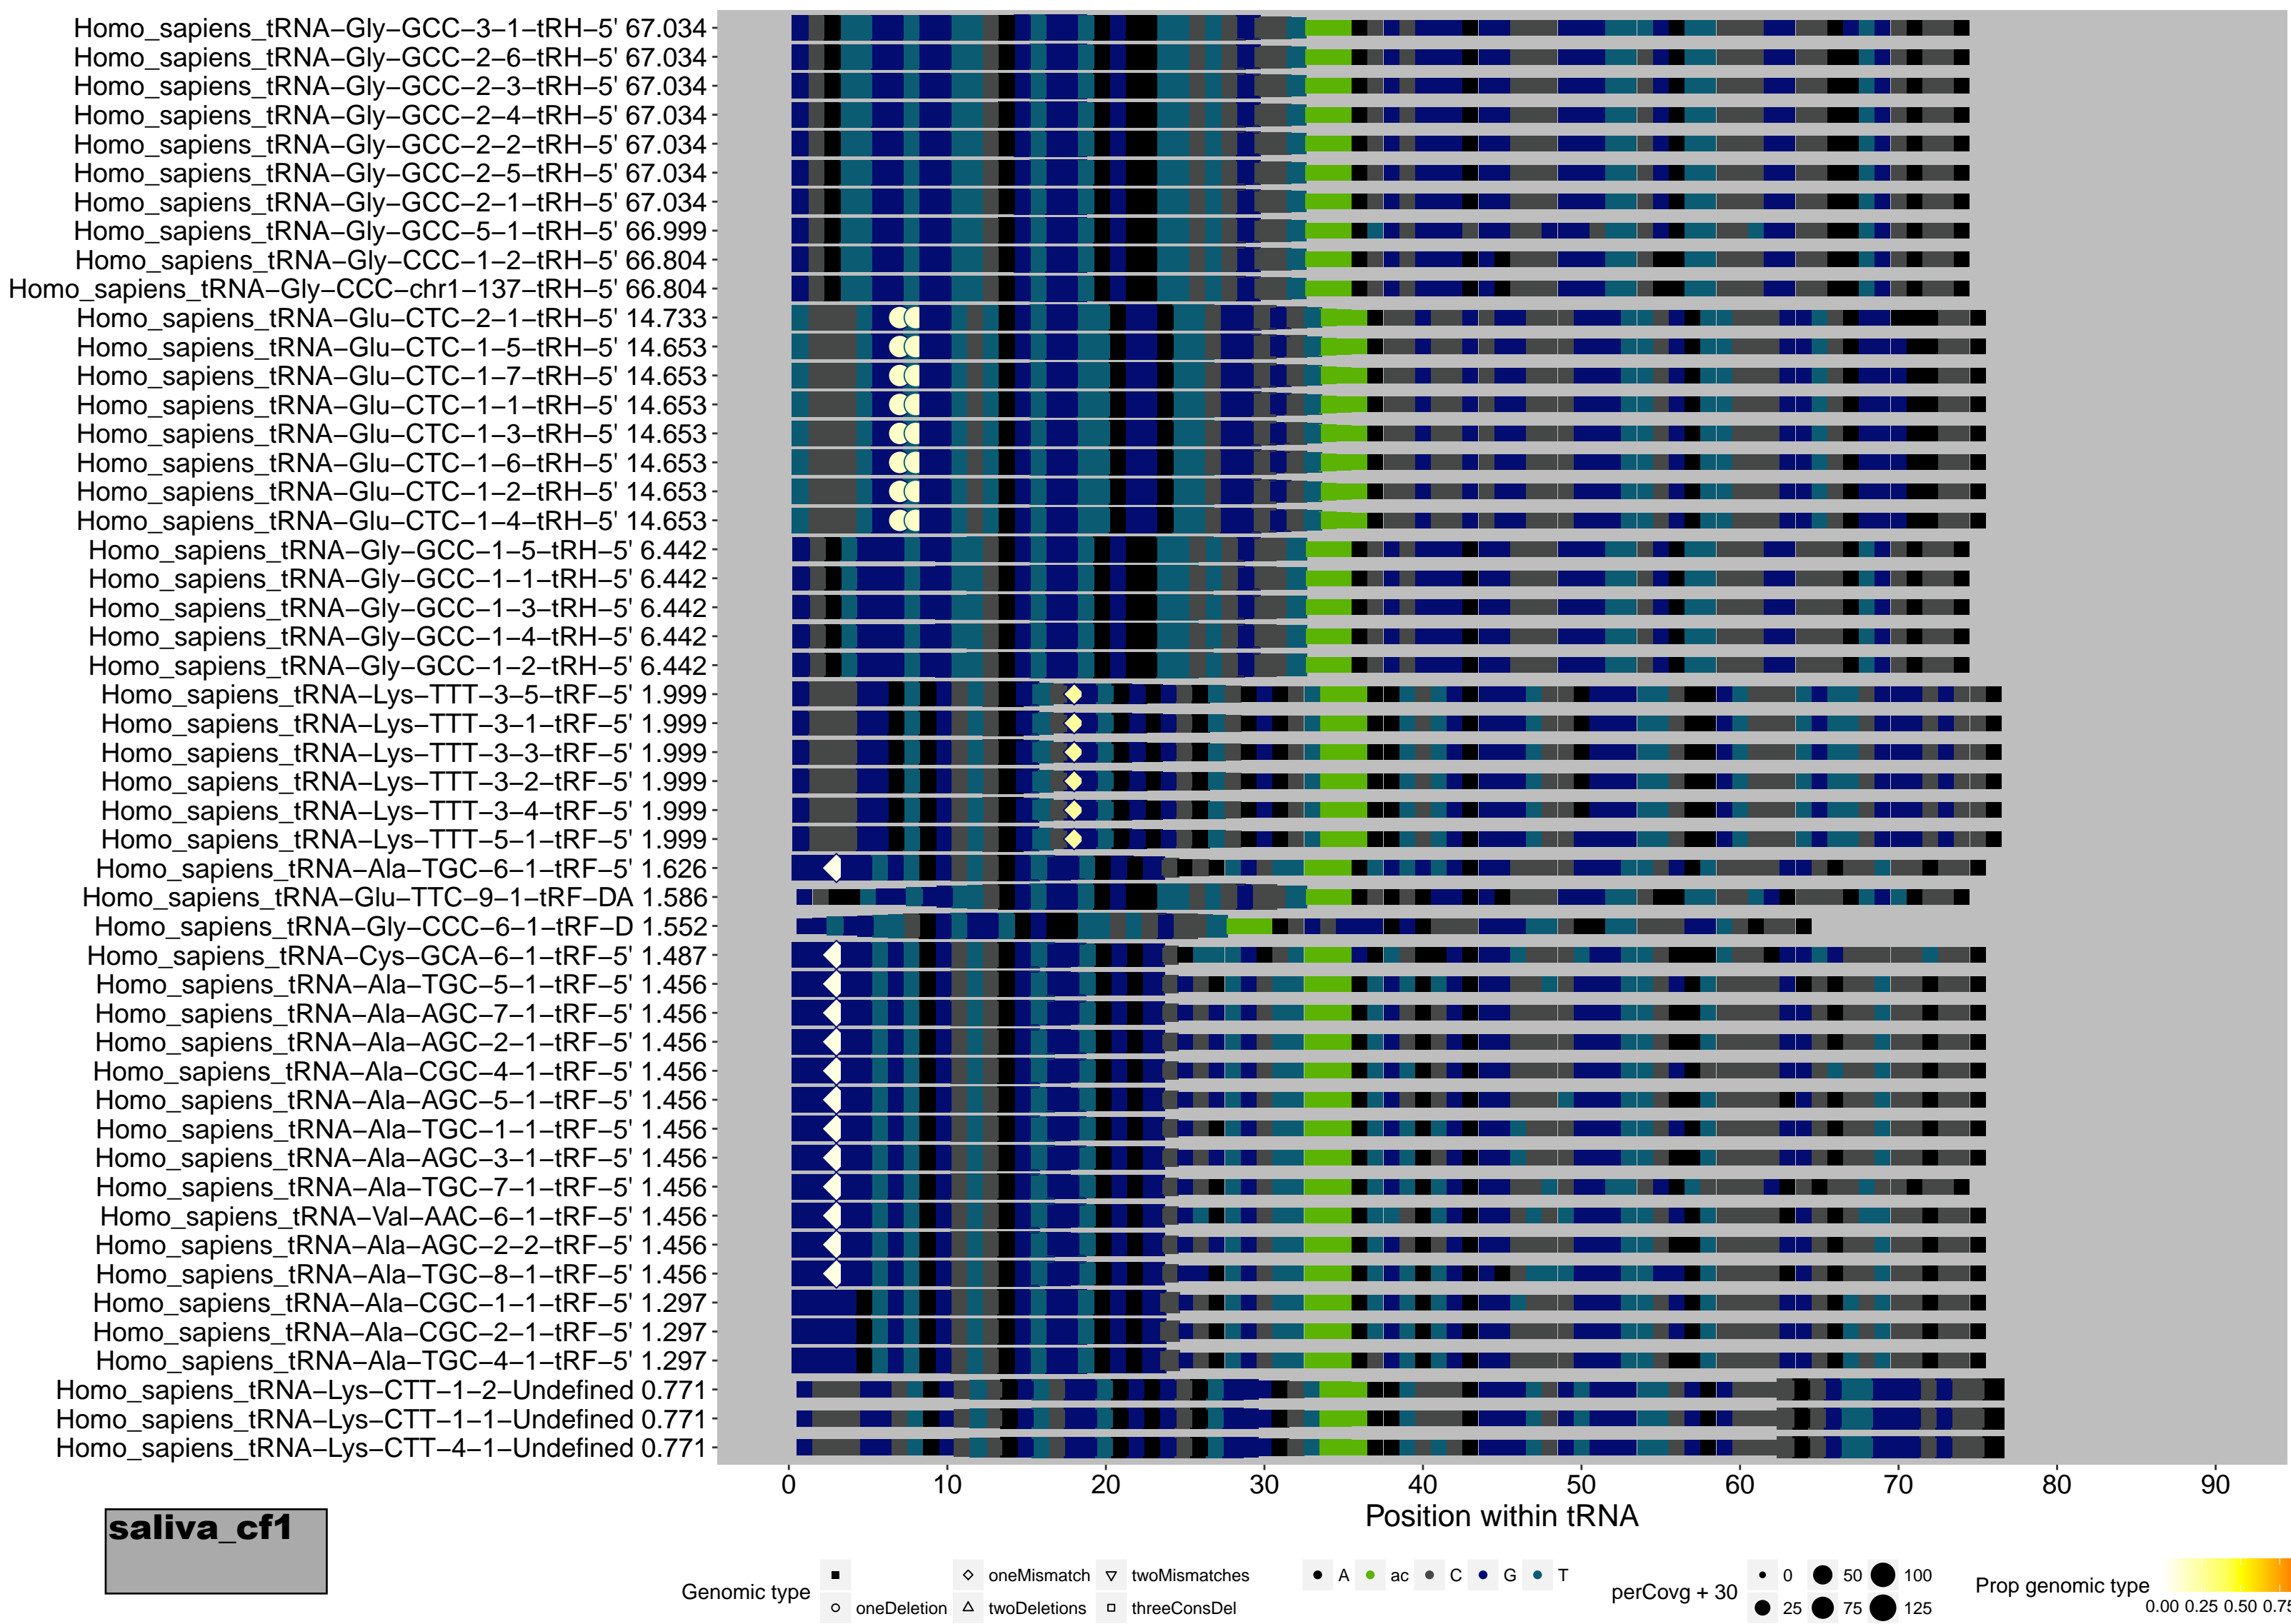

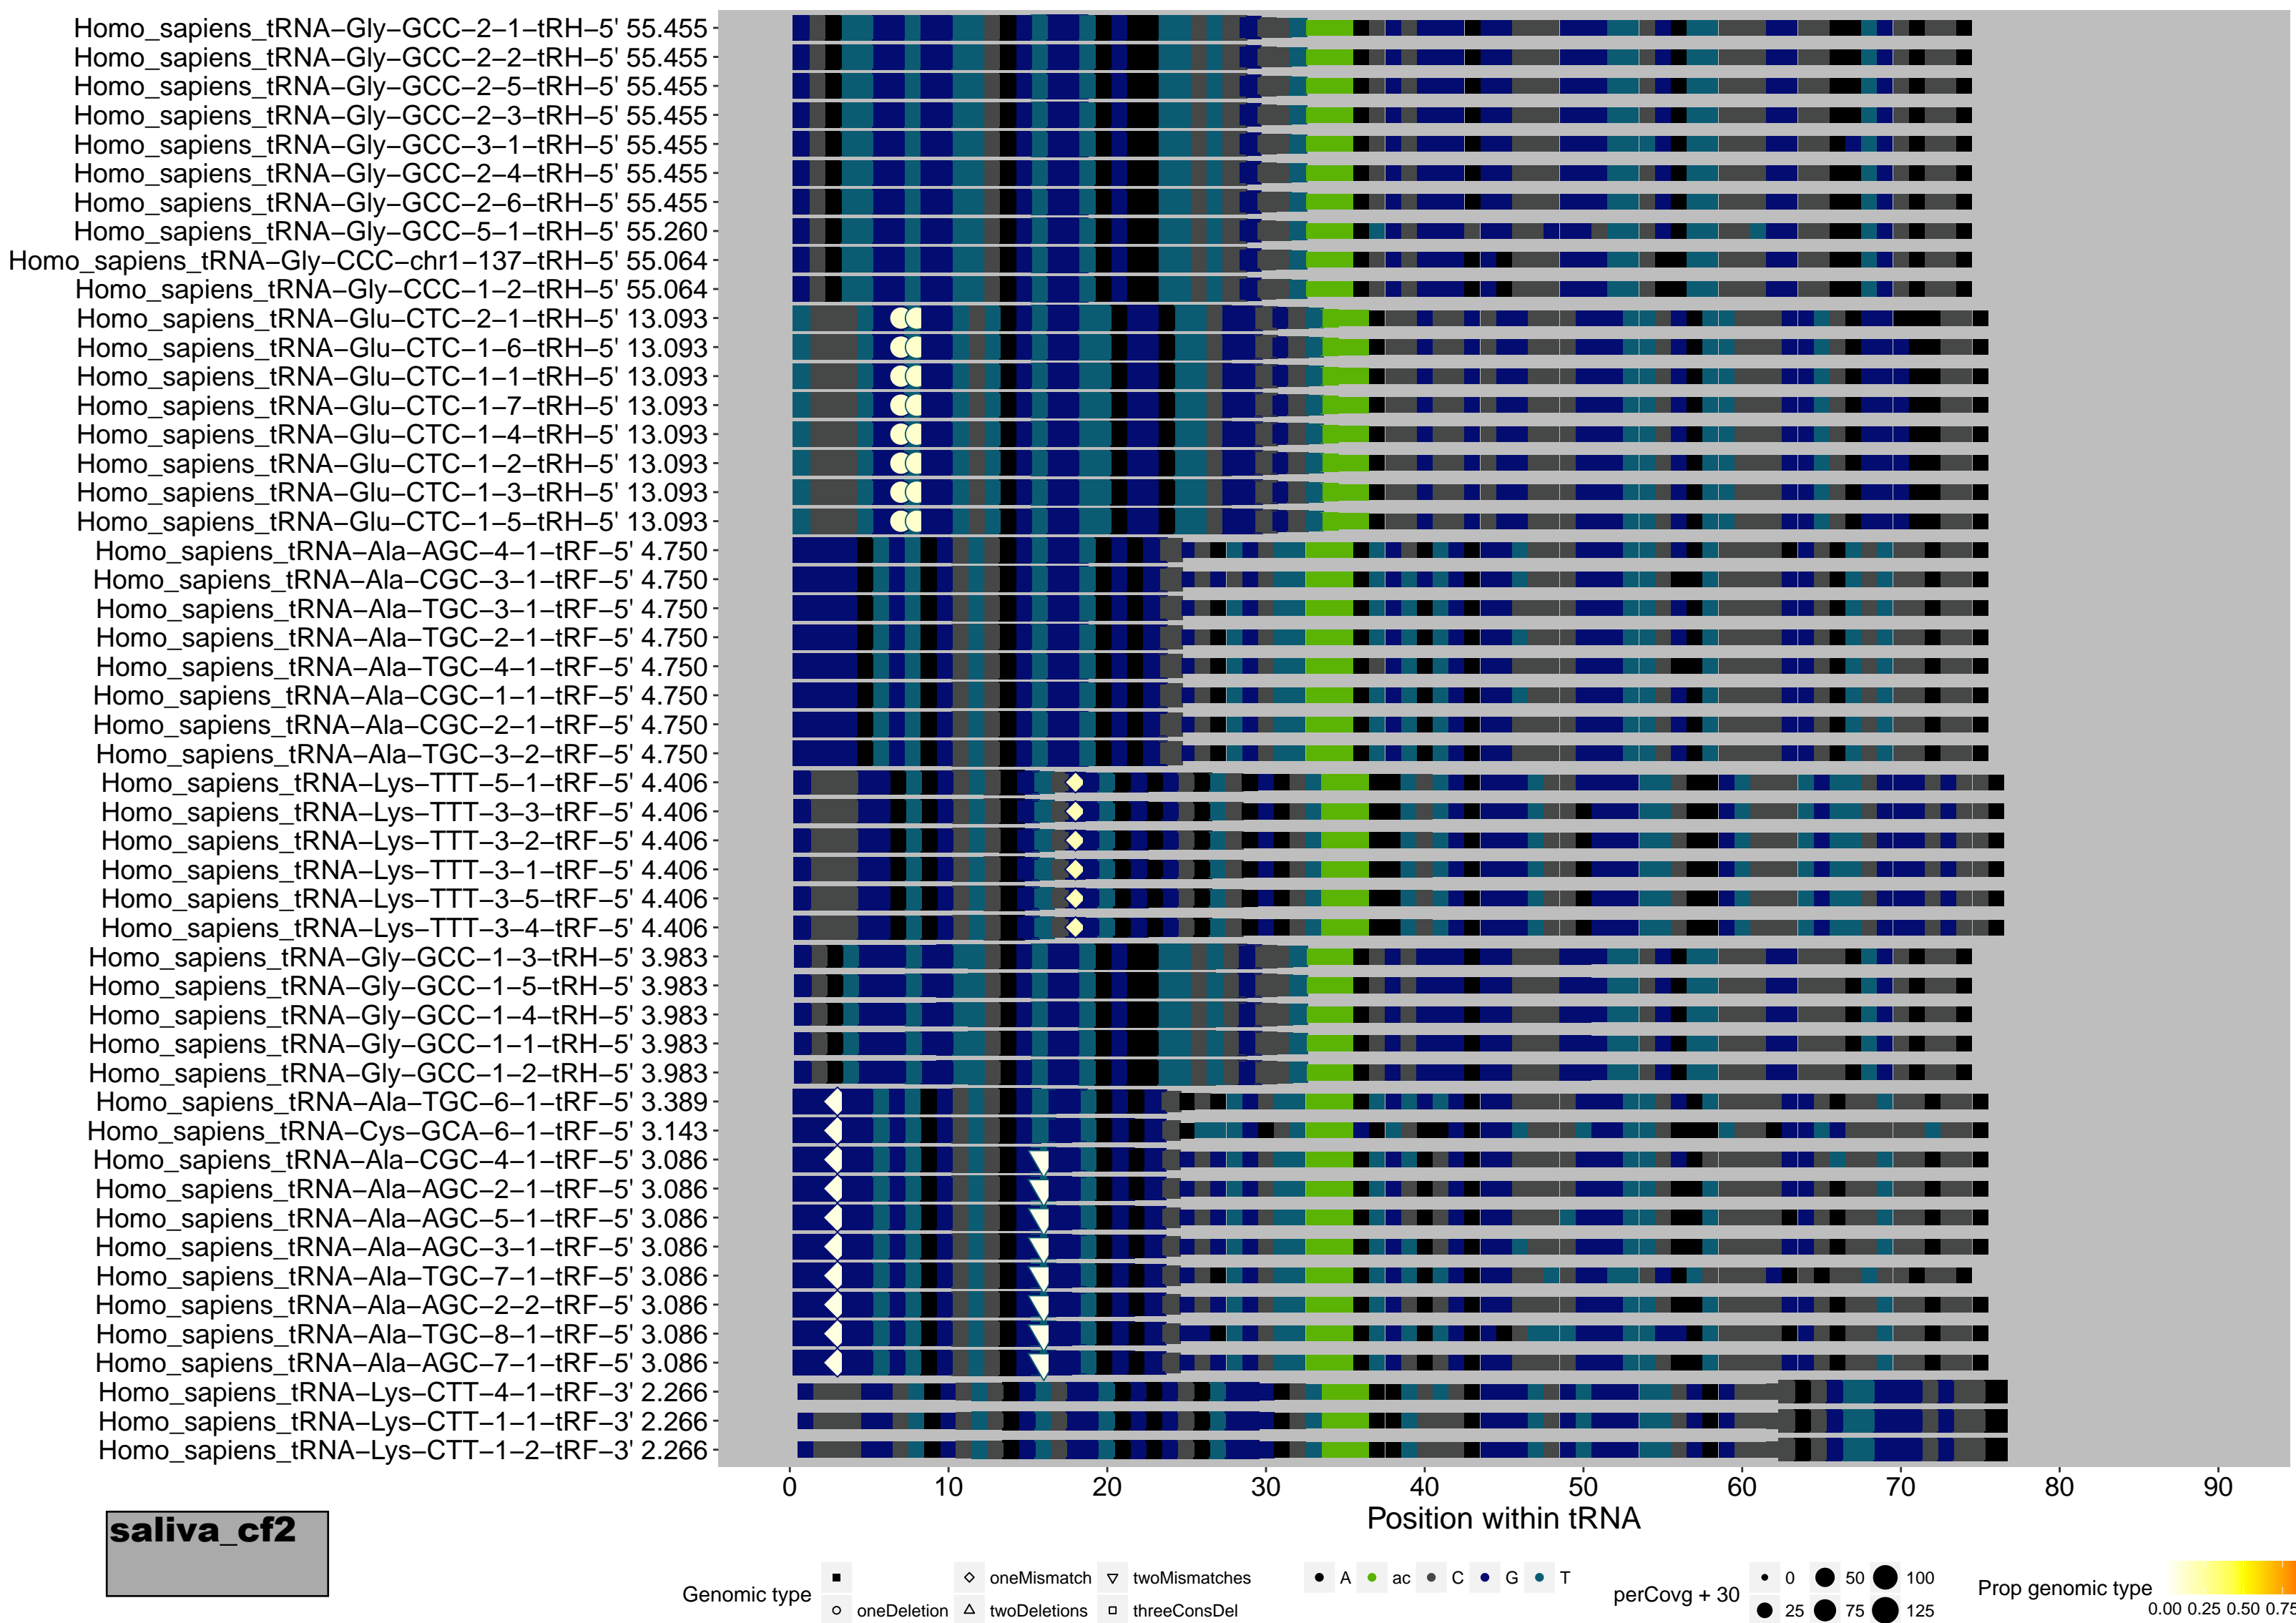

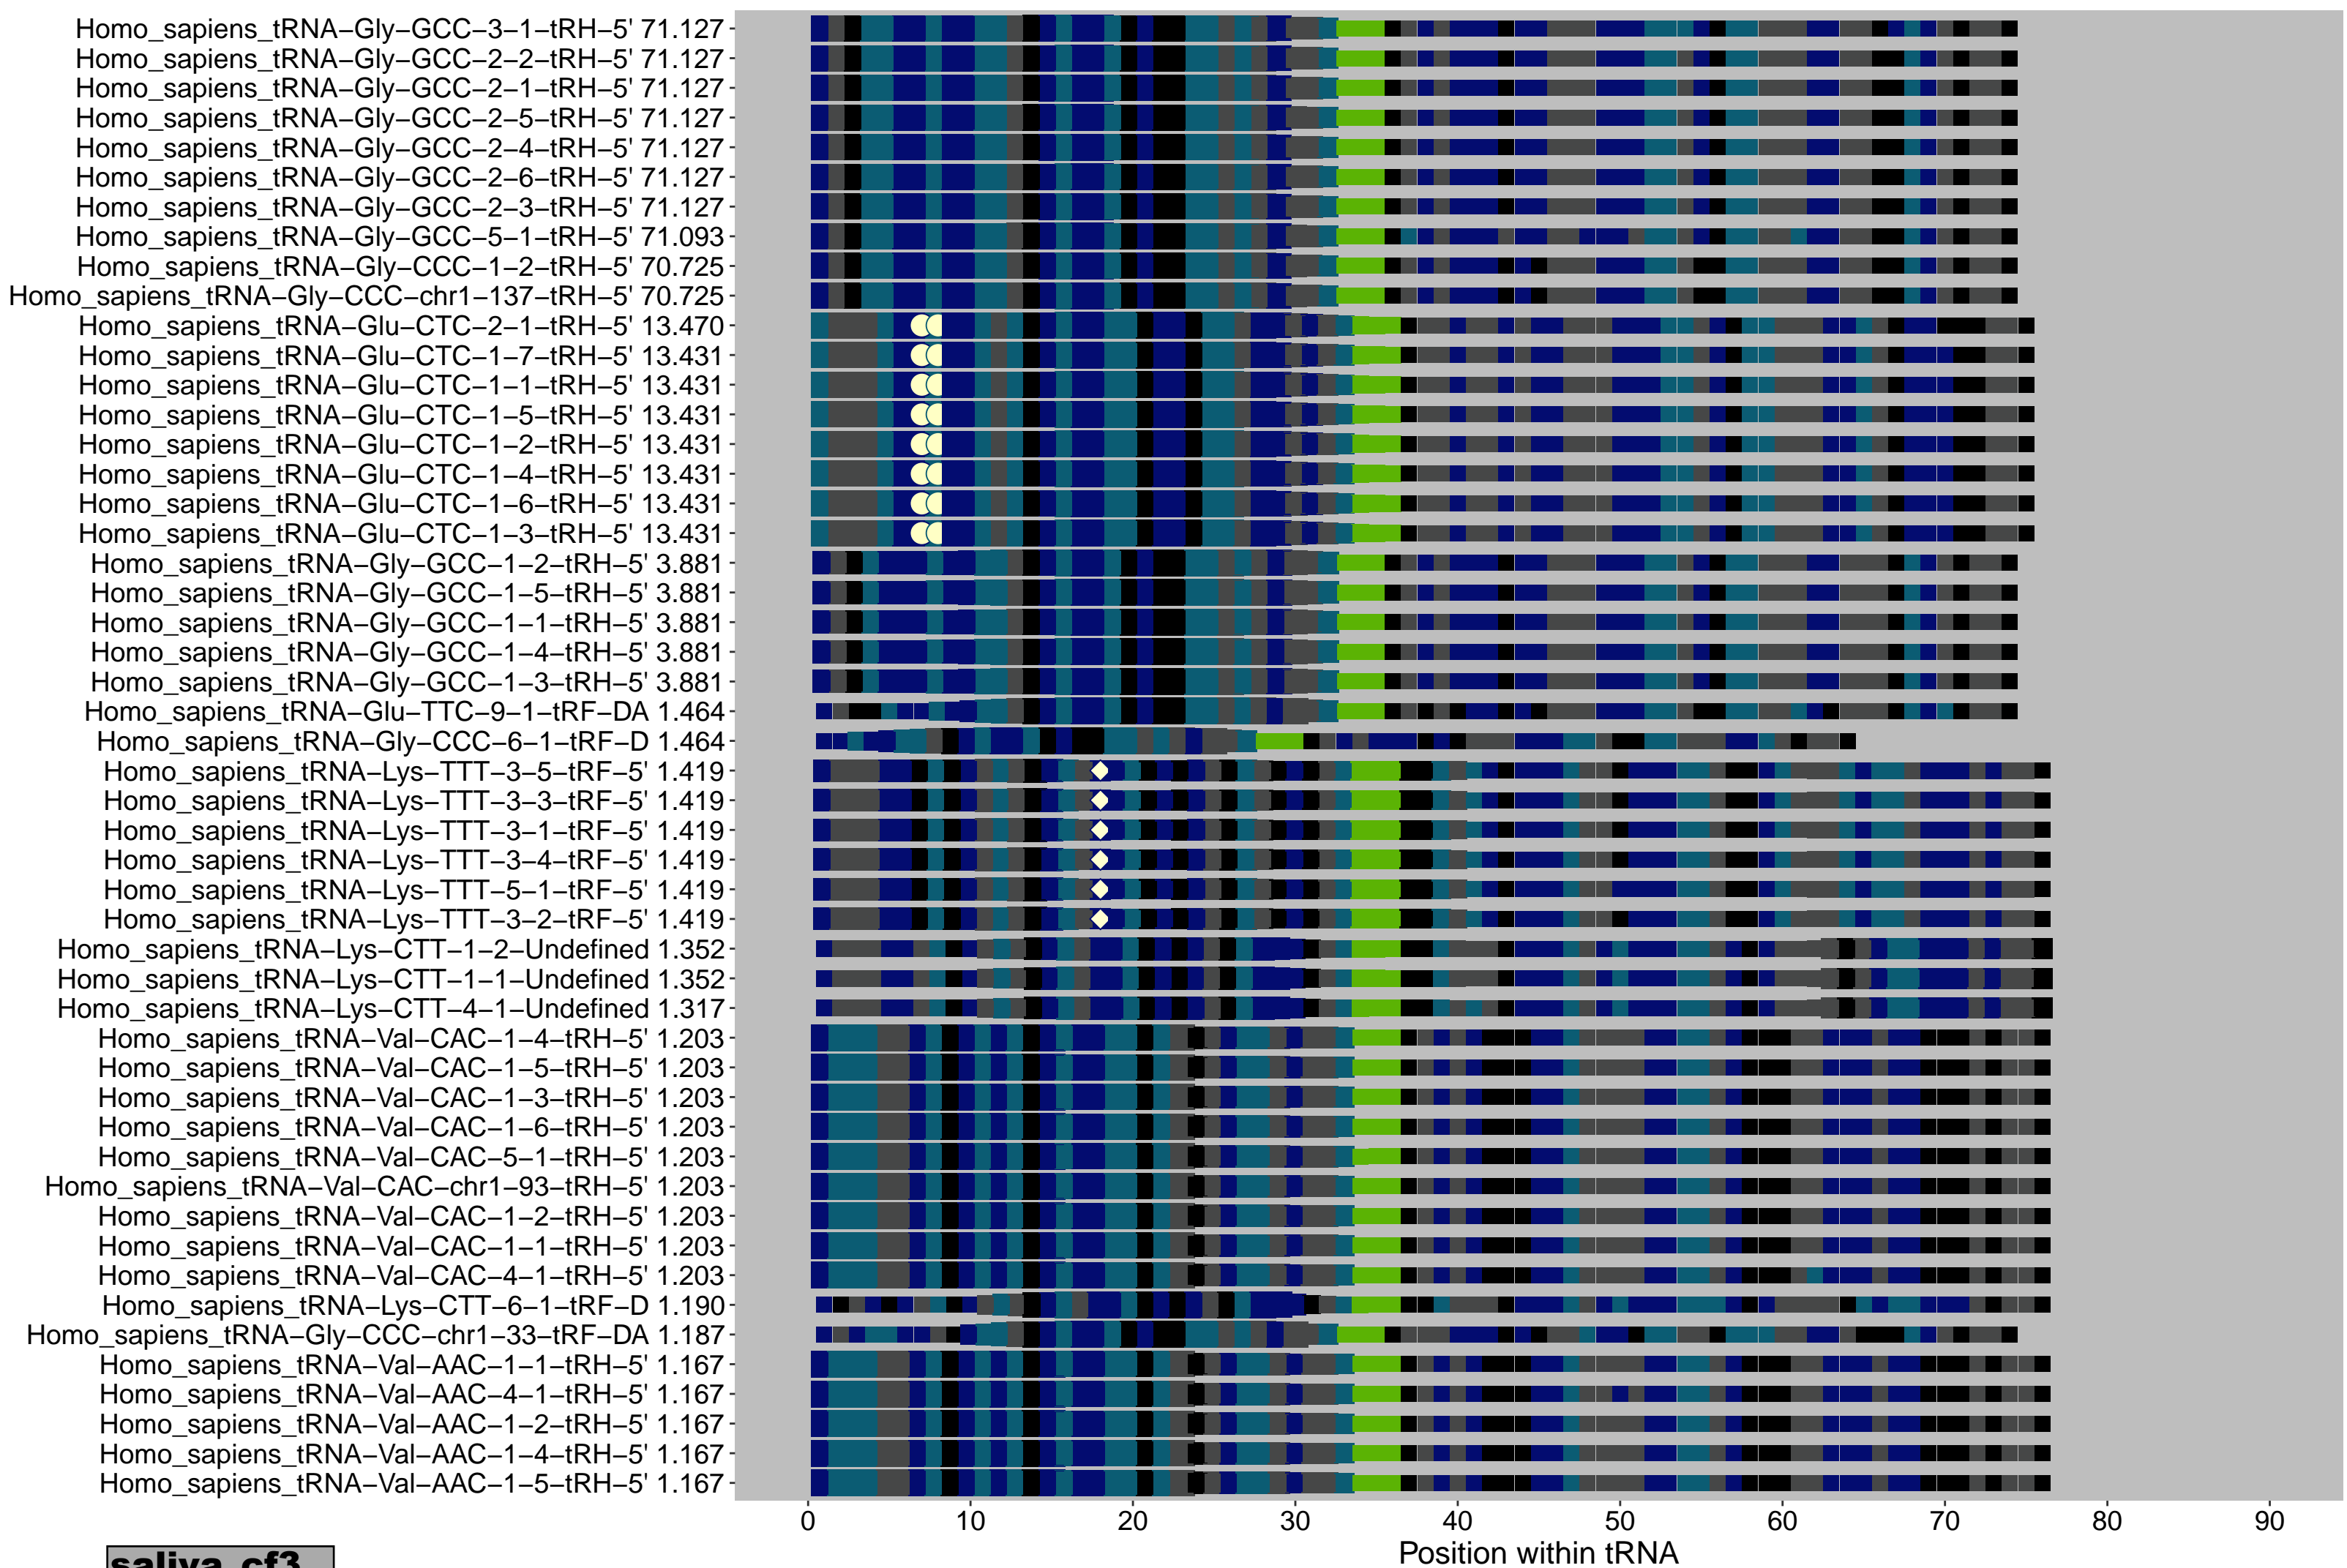

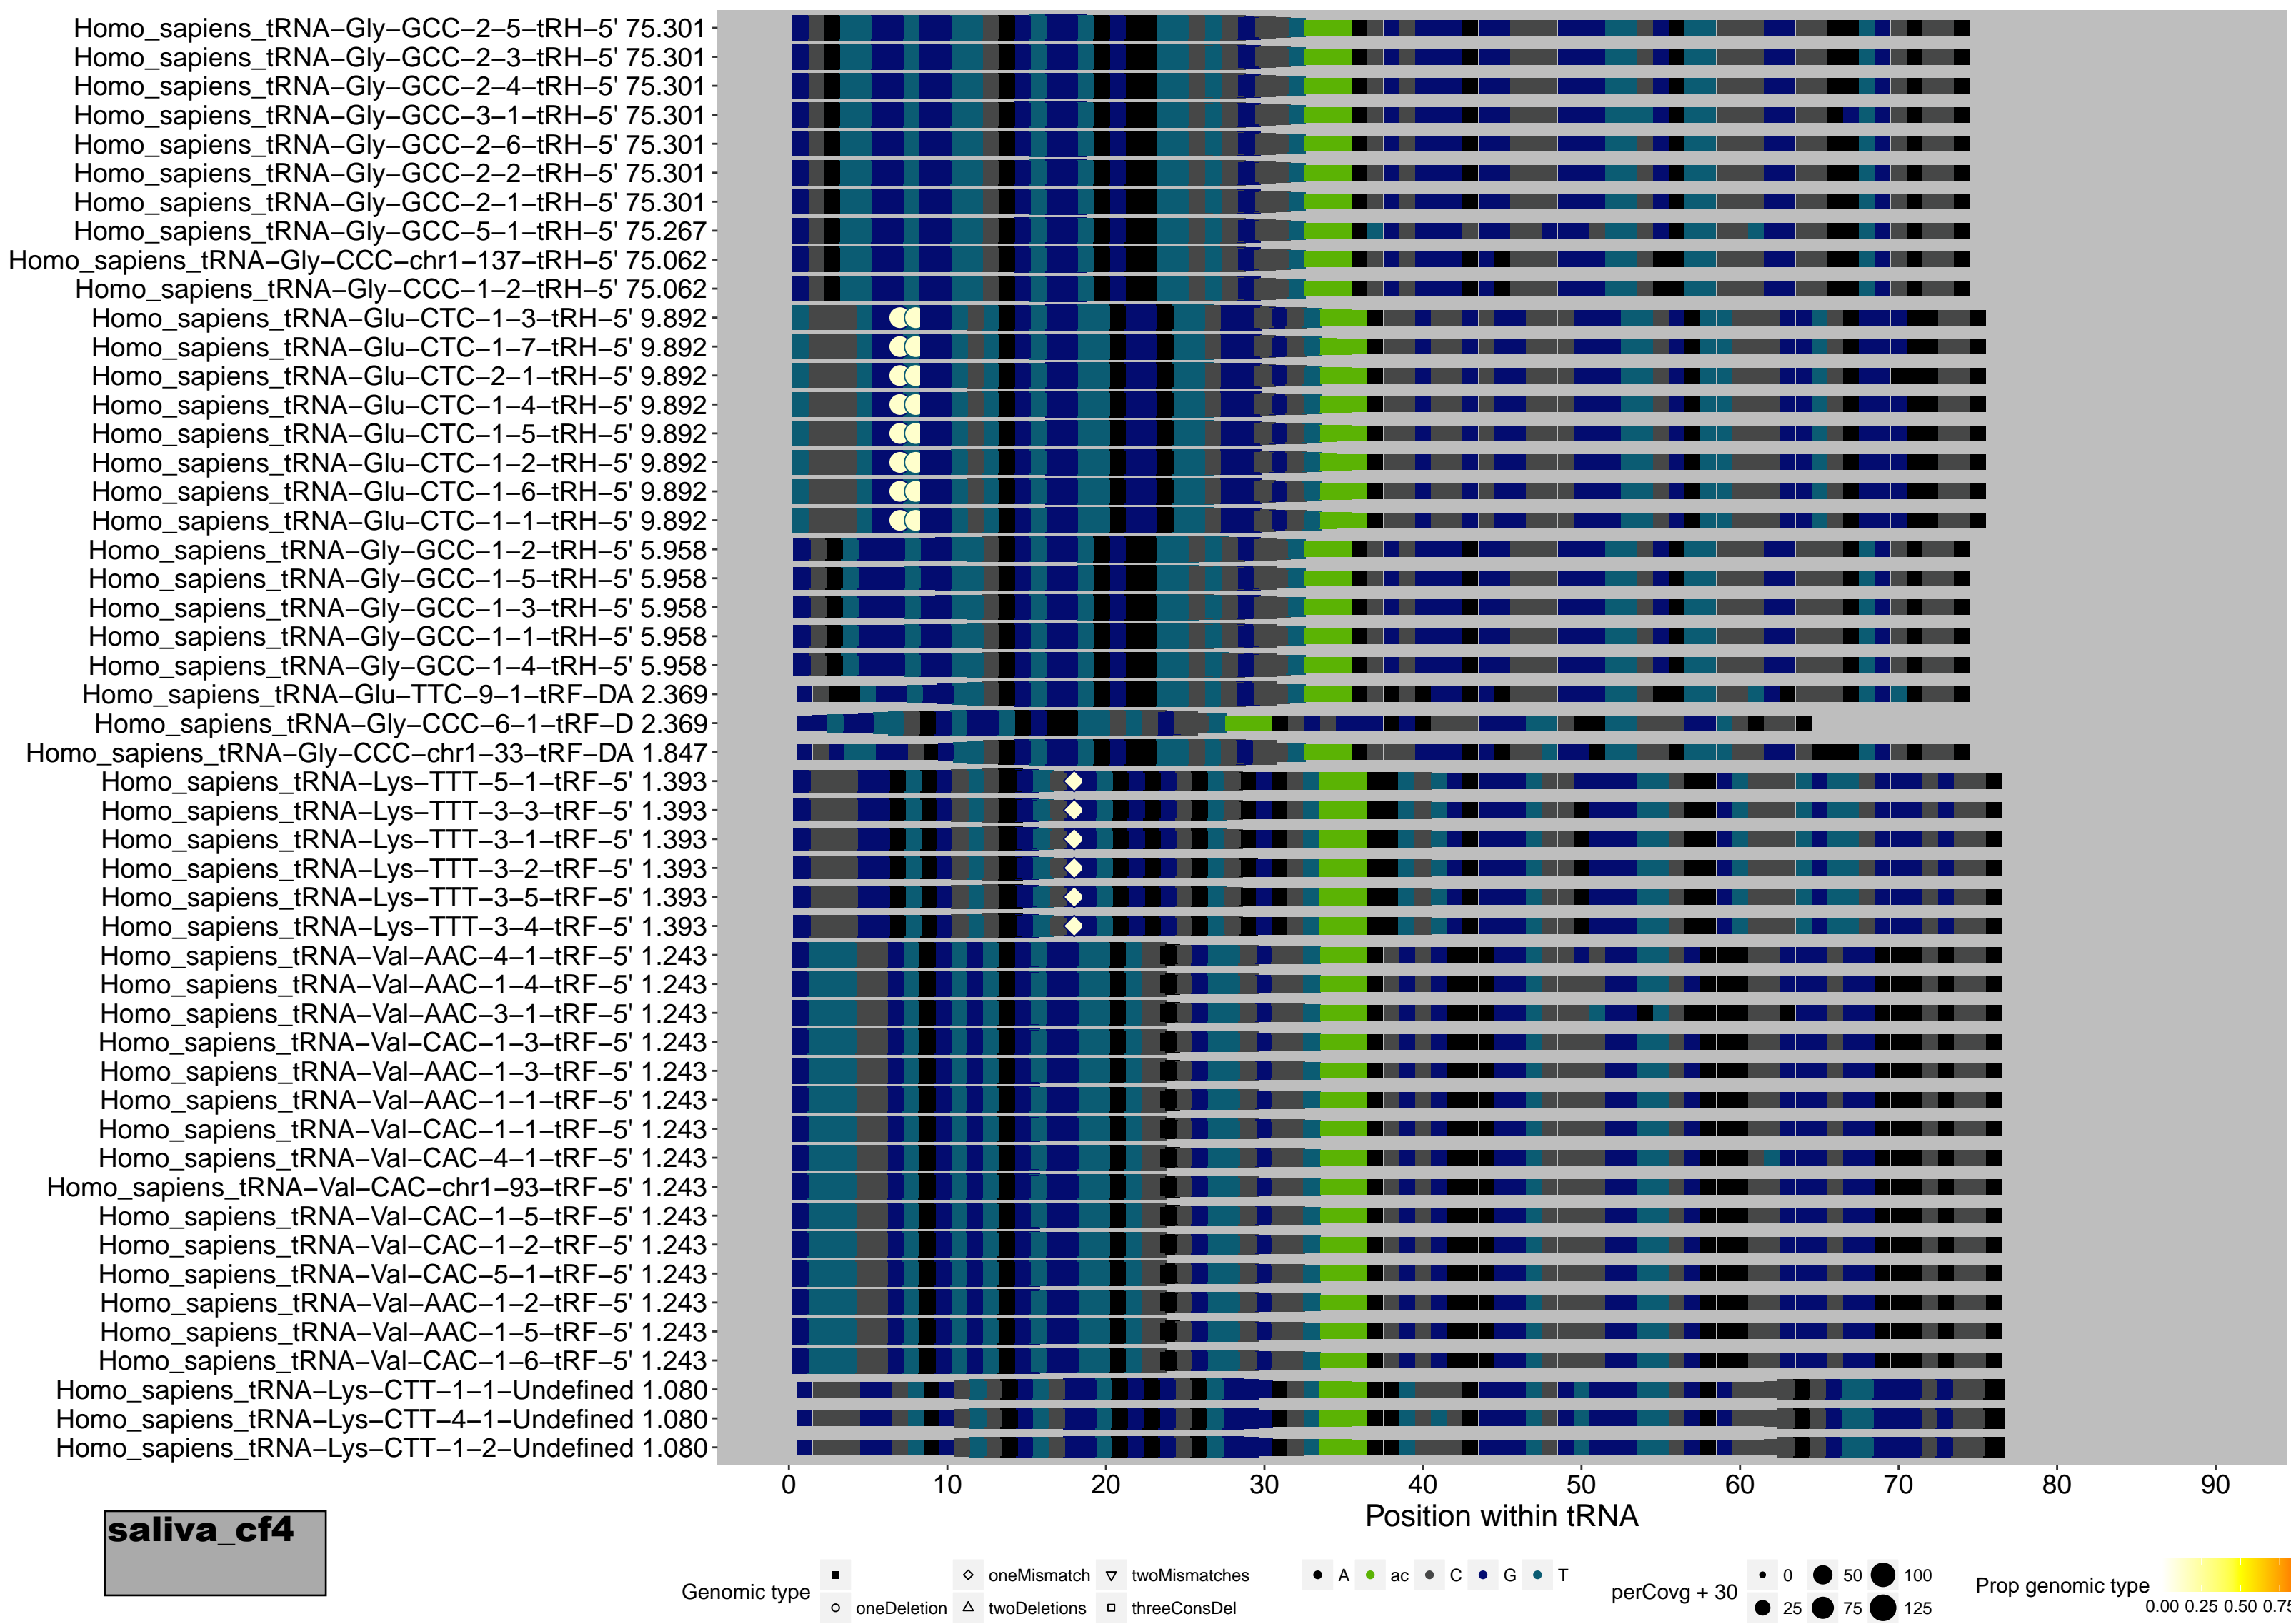



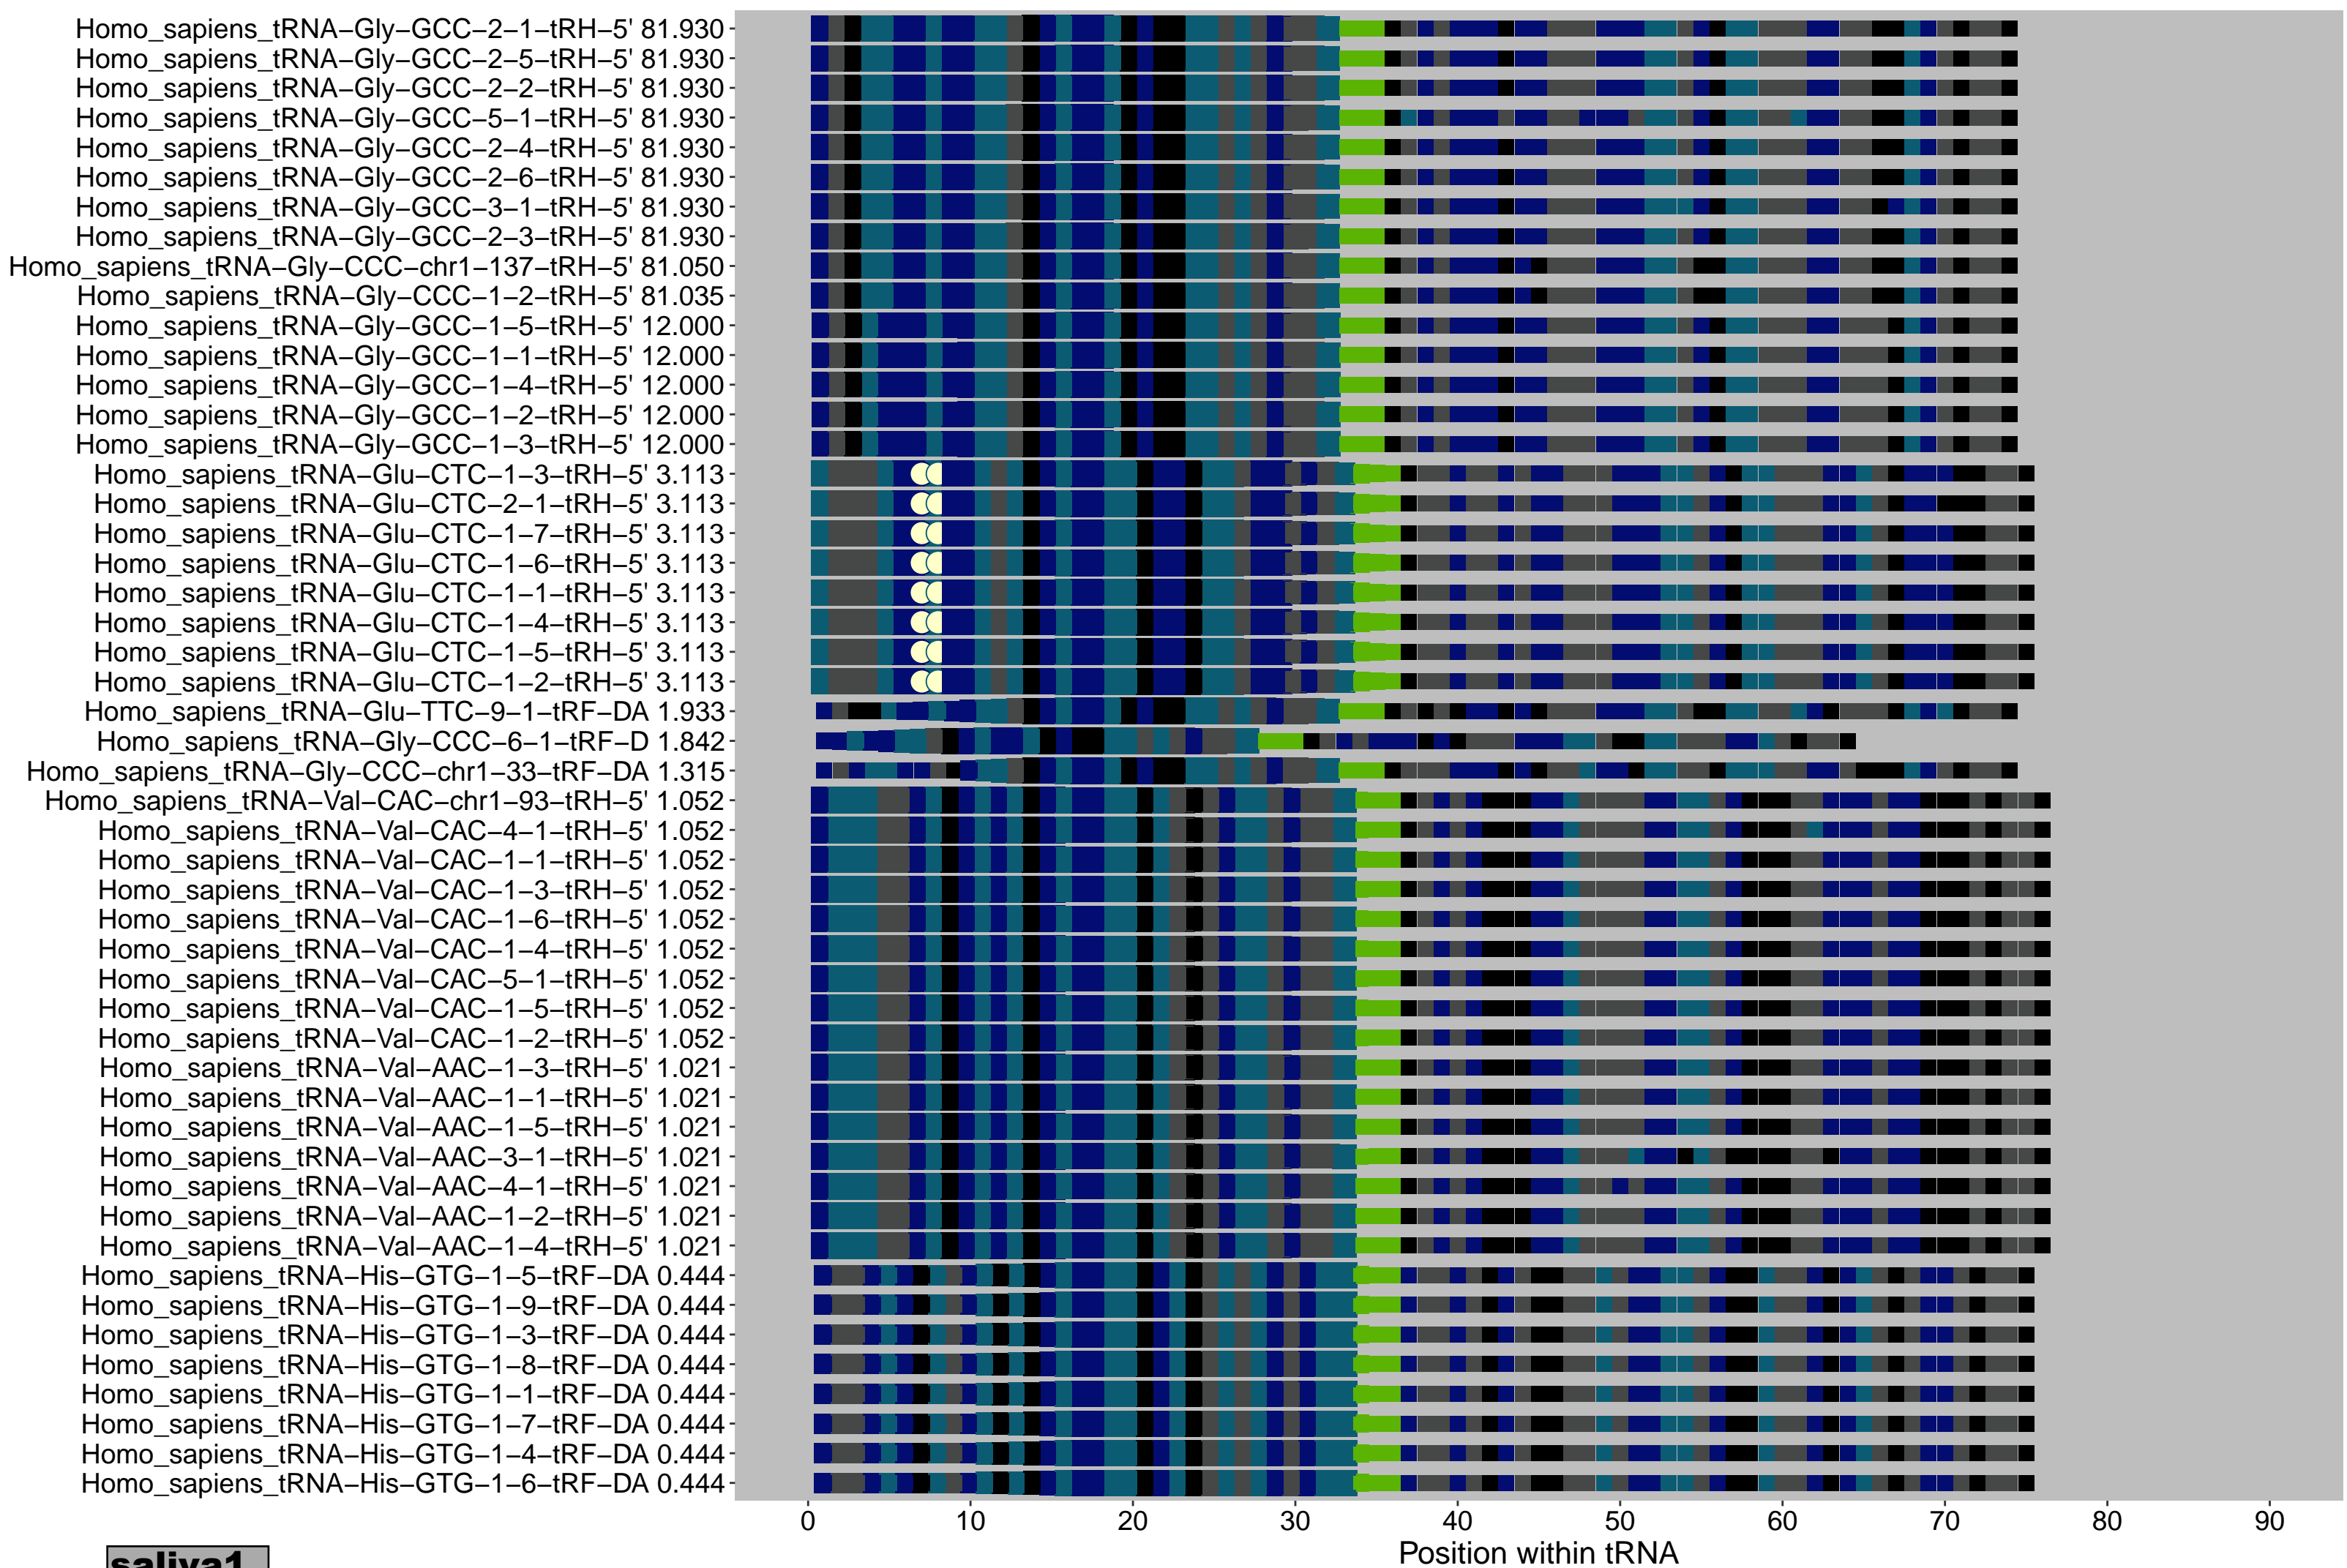

**saliva1**

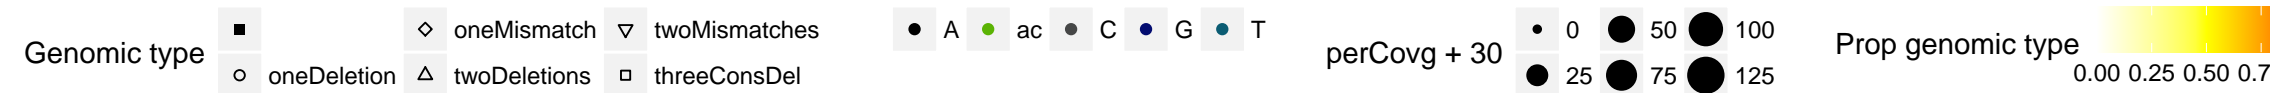

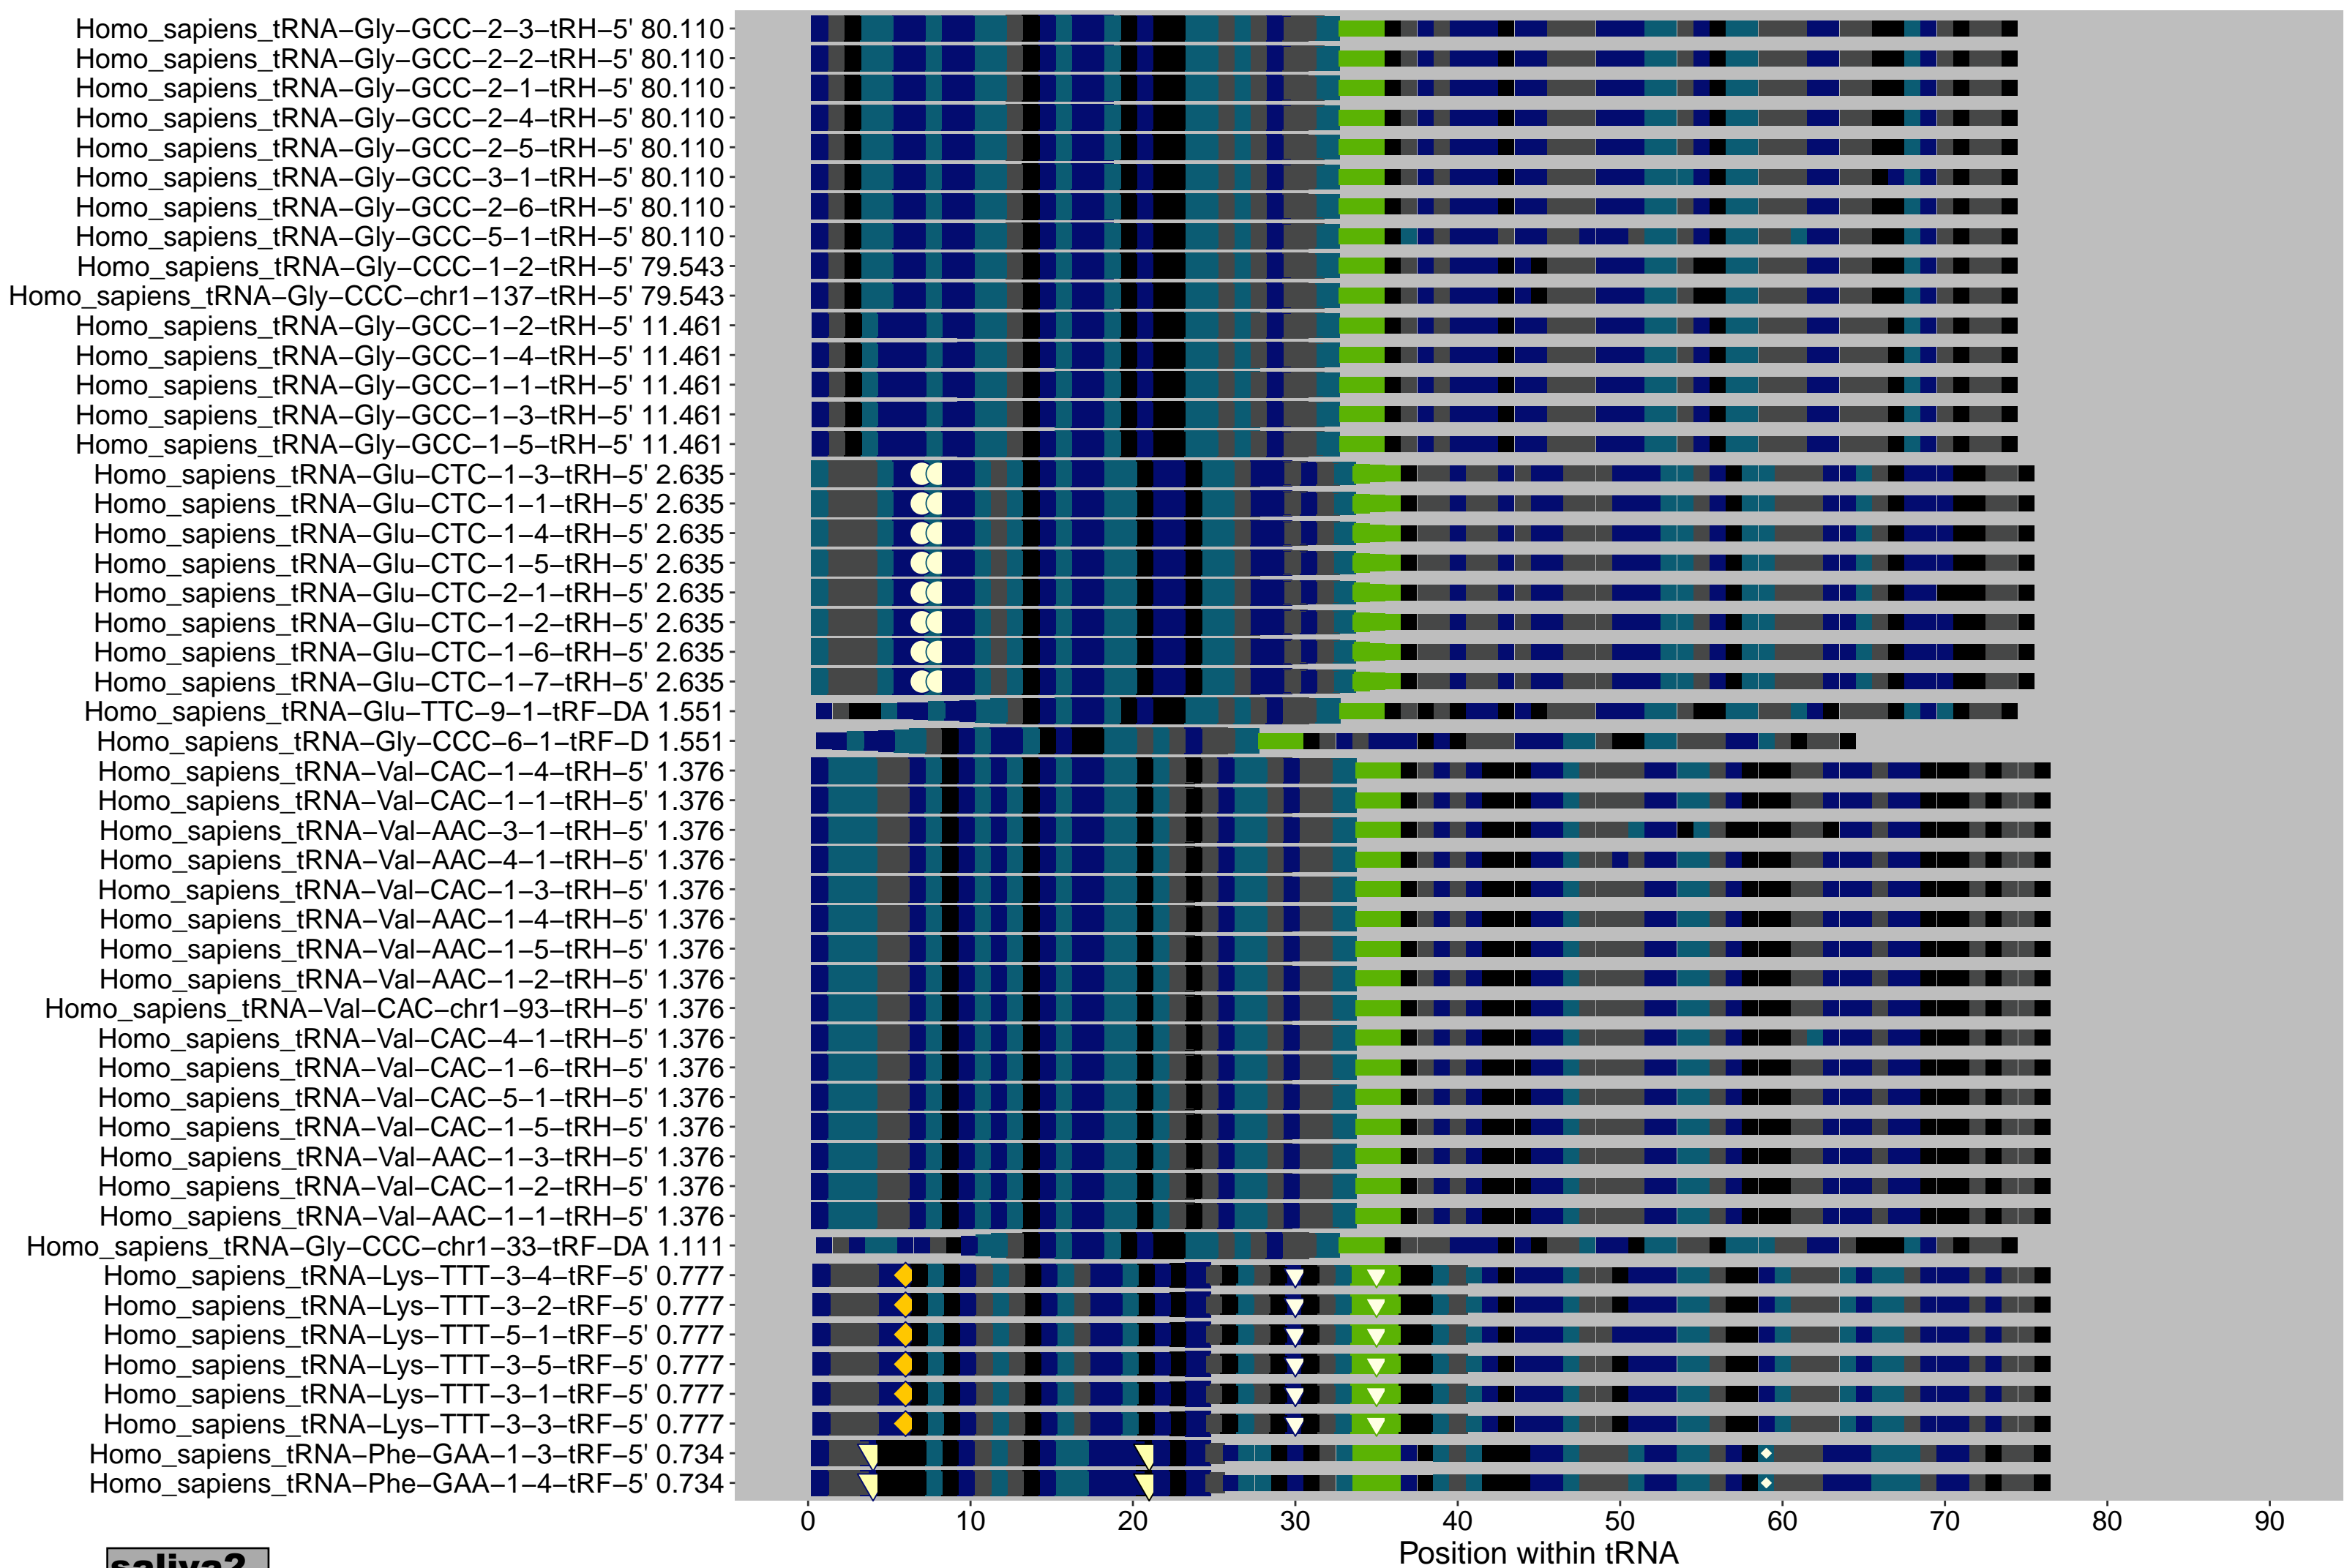

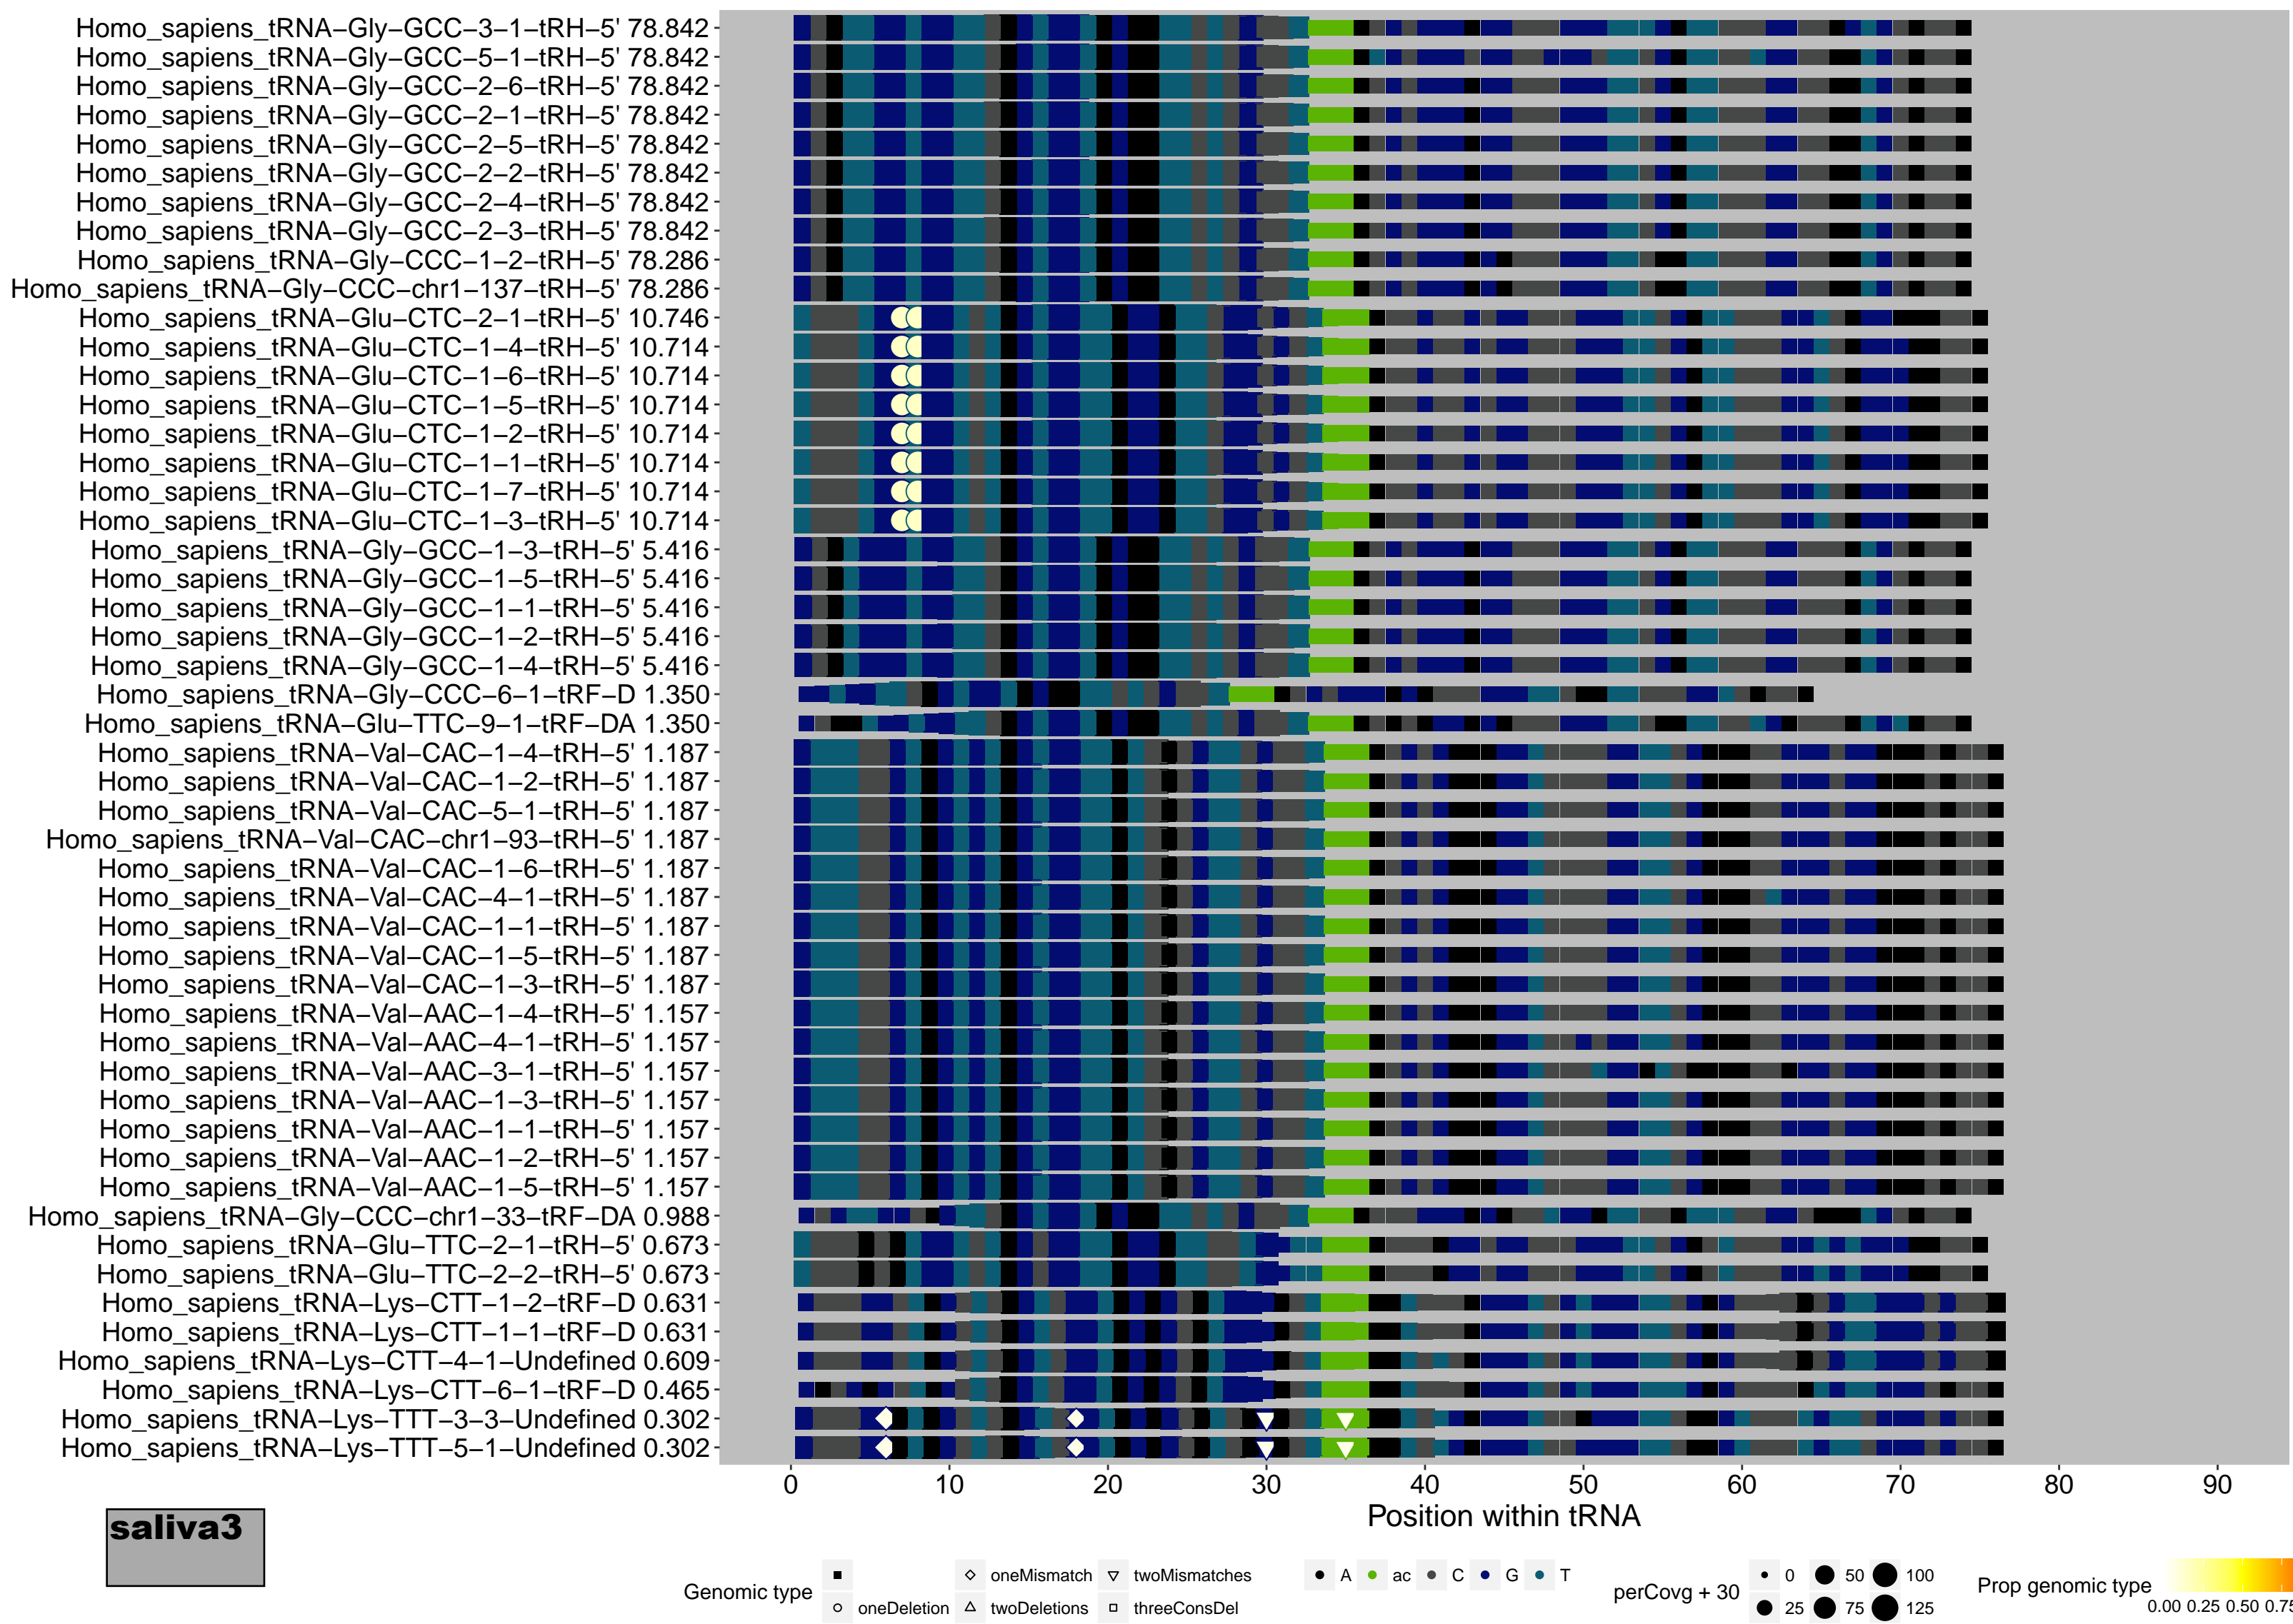

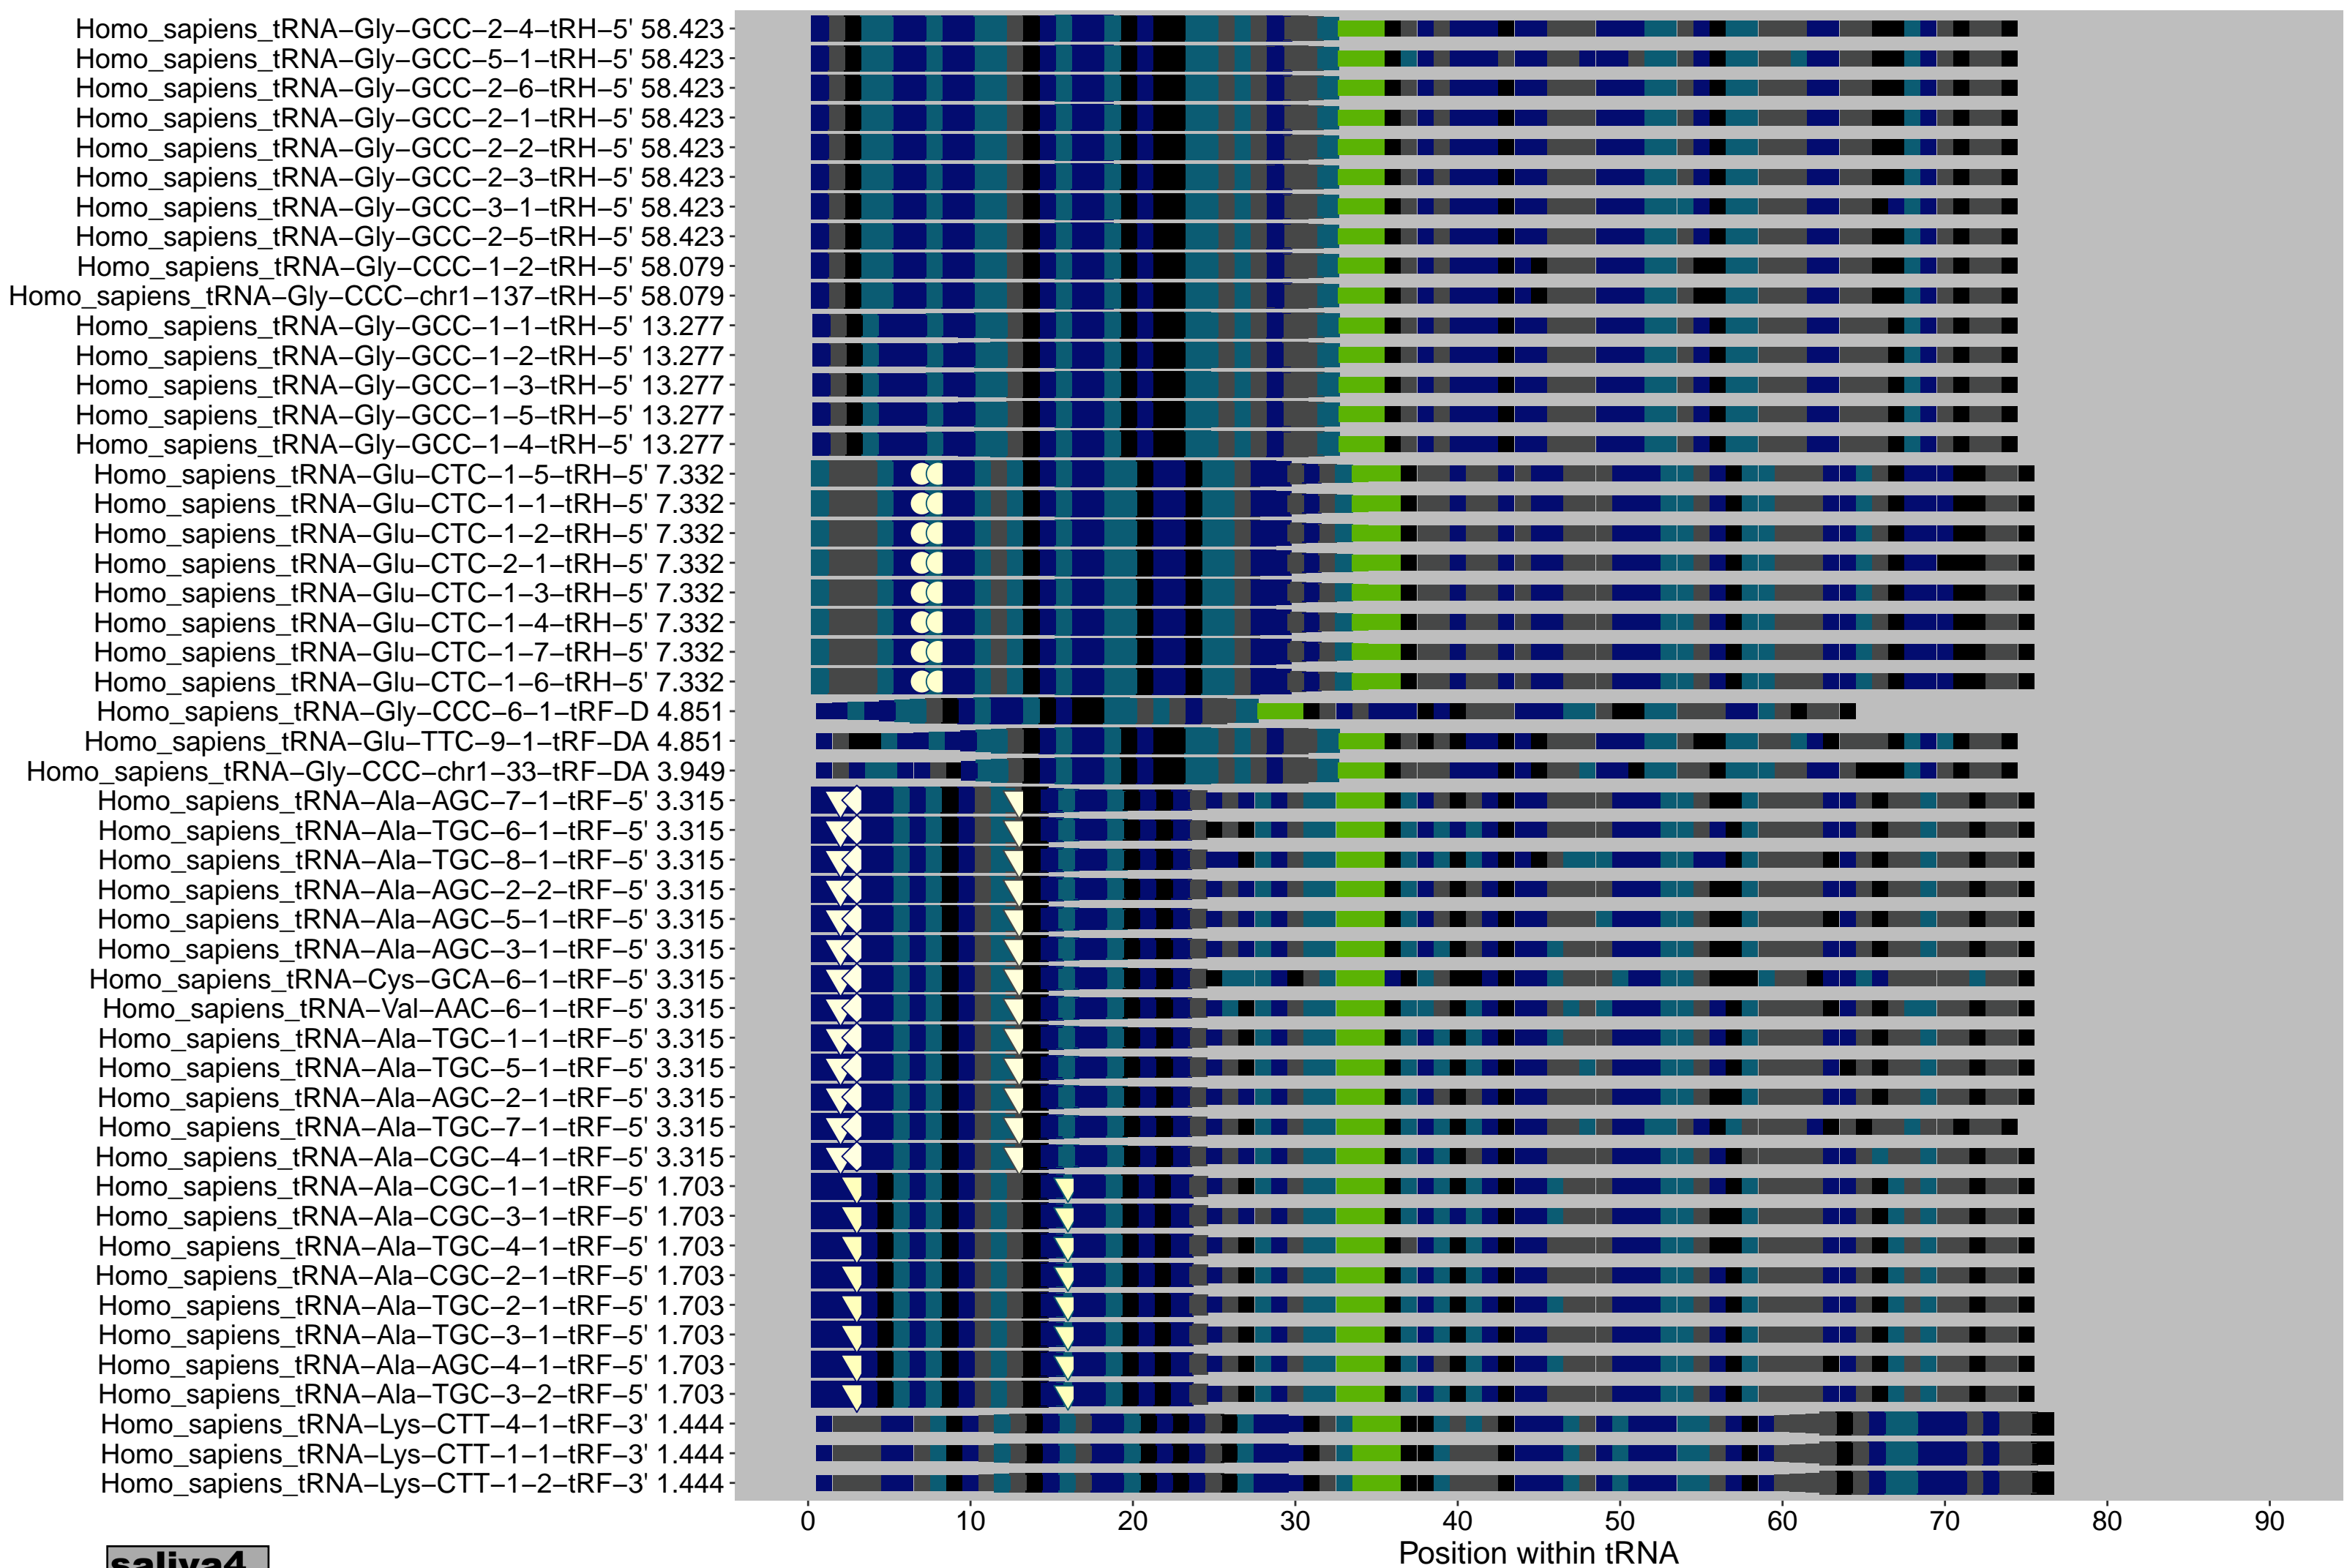

**saliva4**



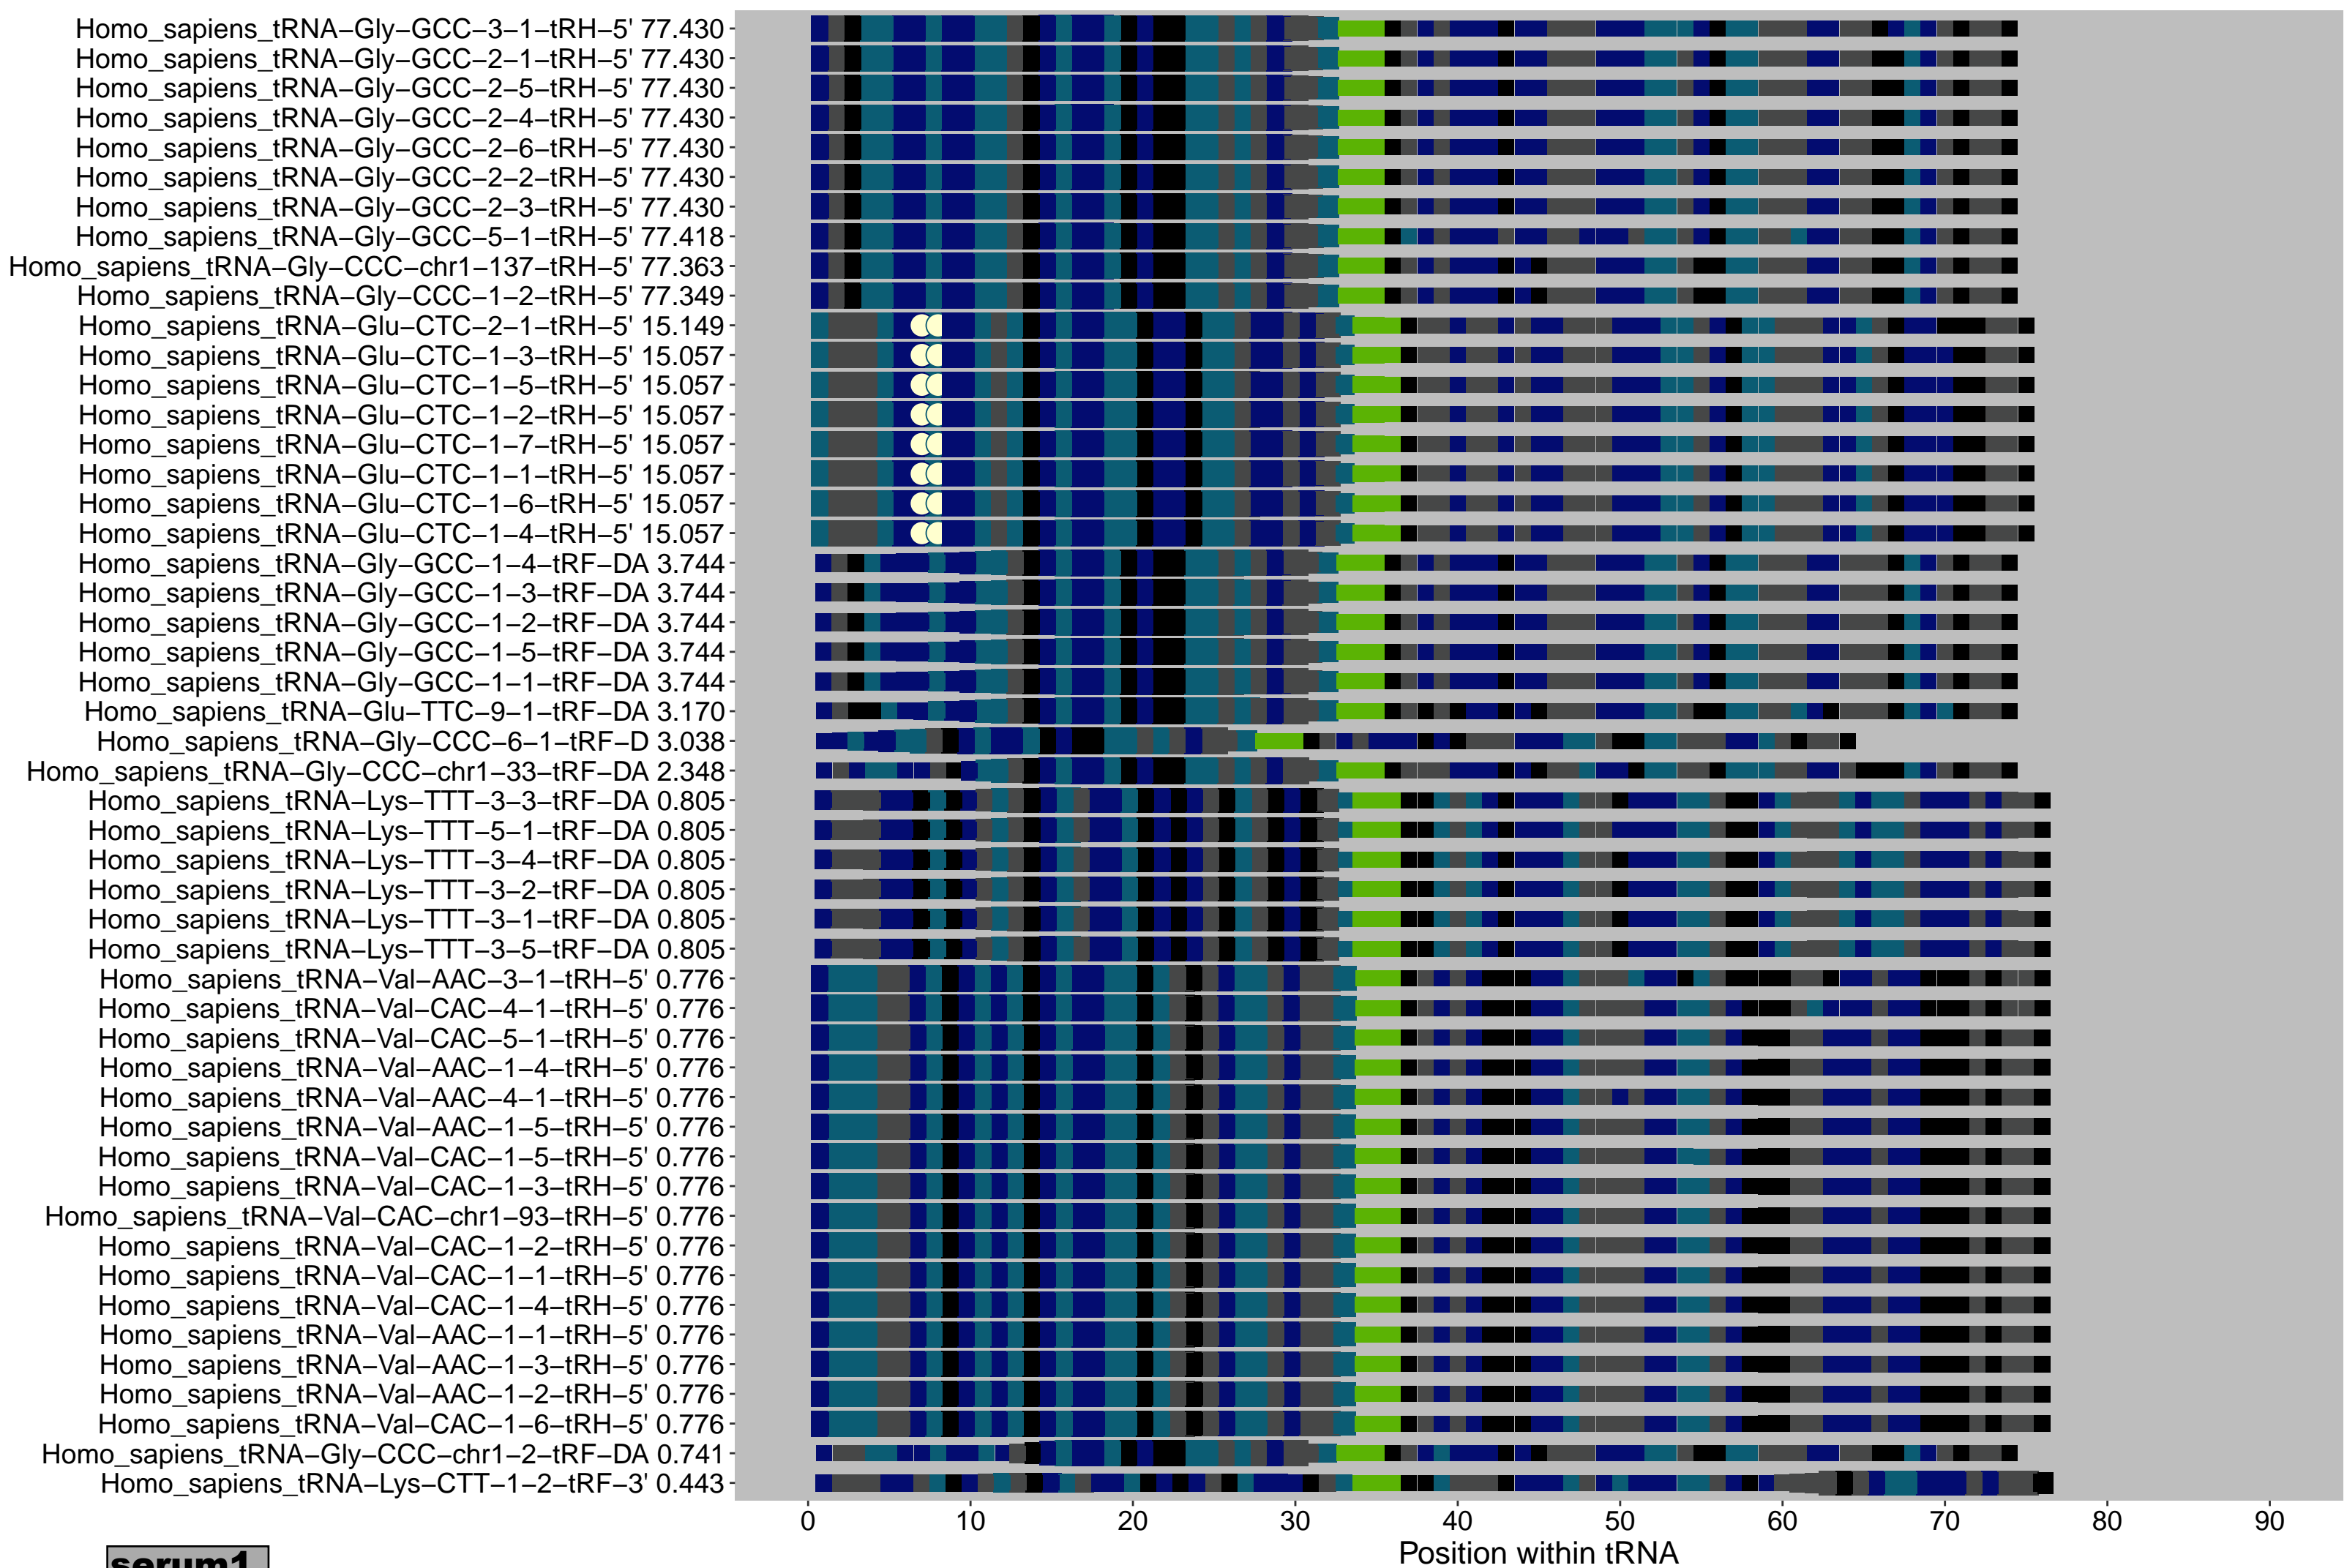

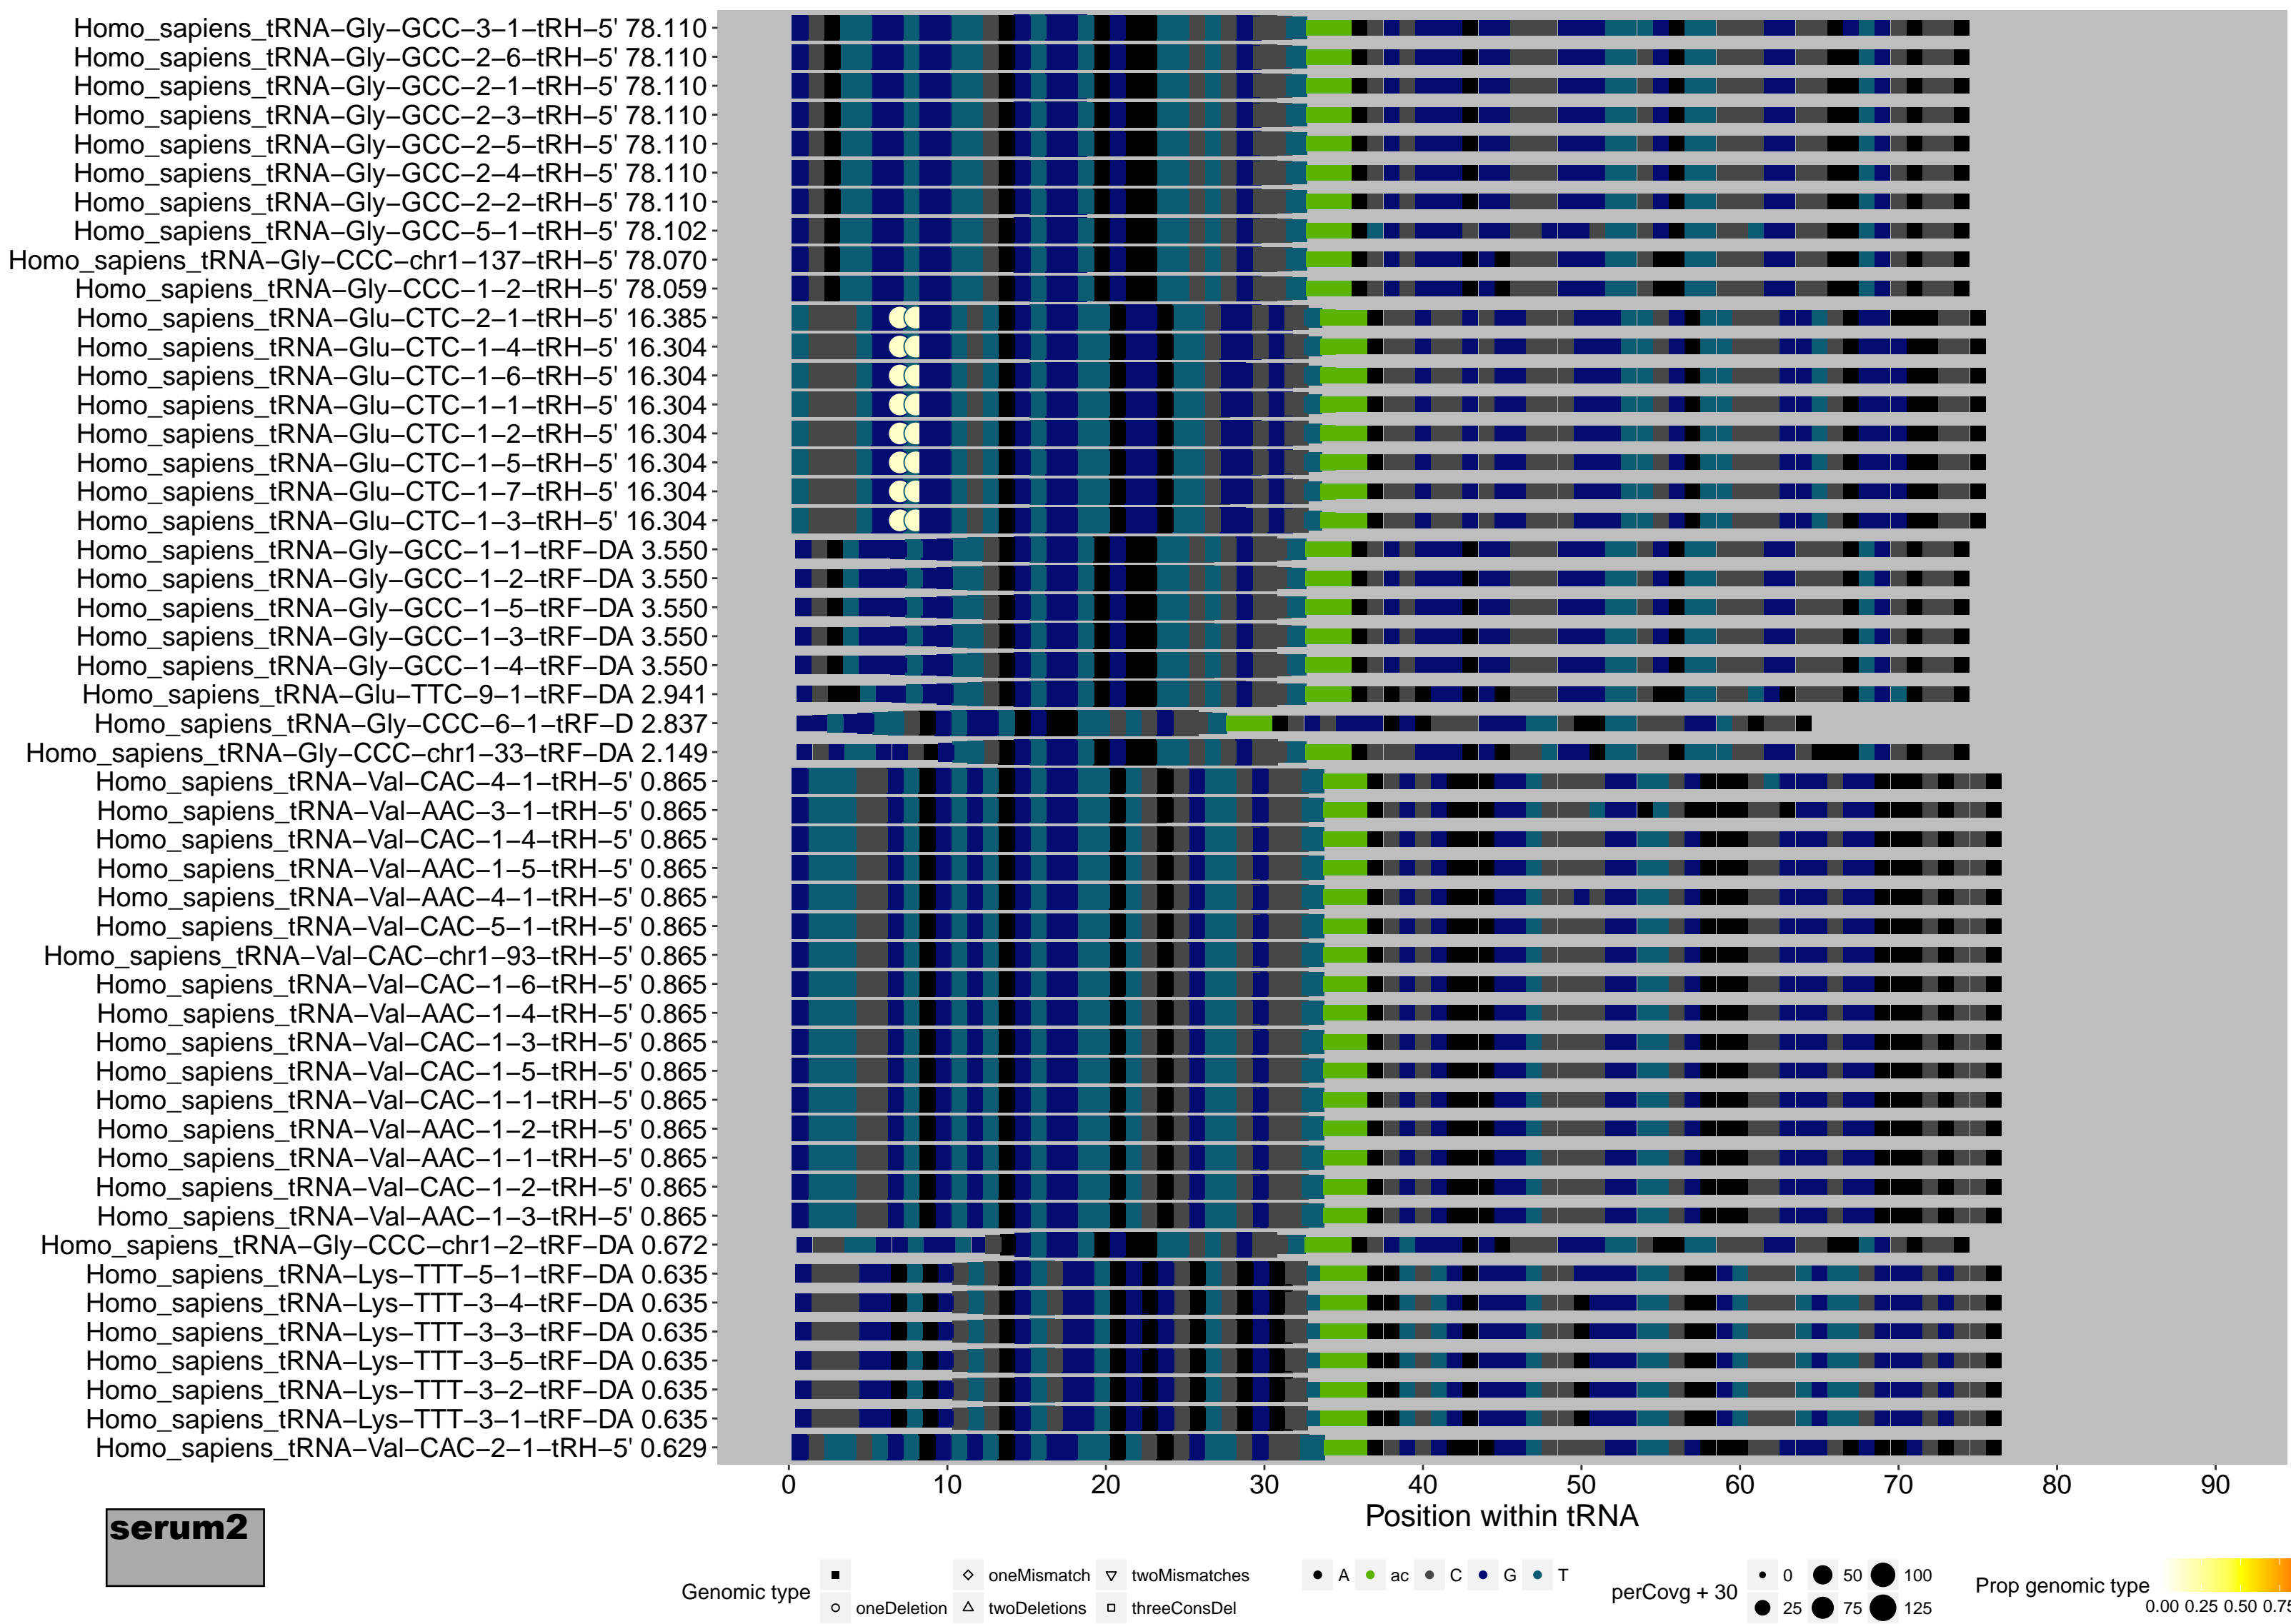

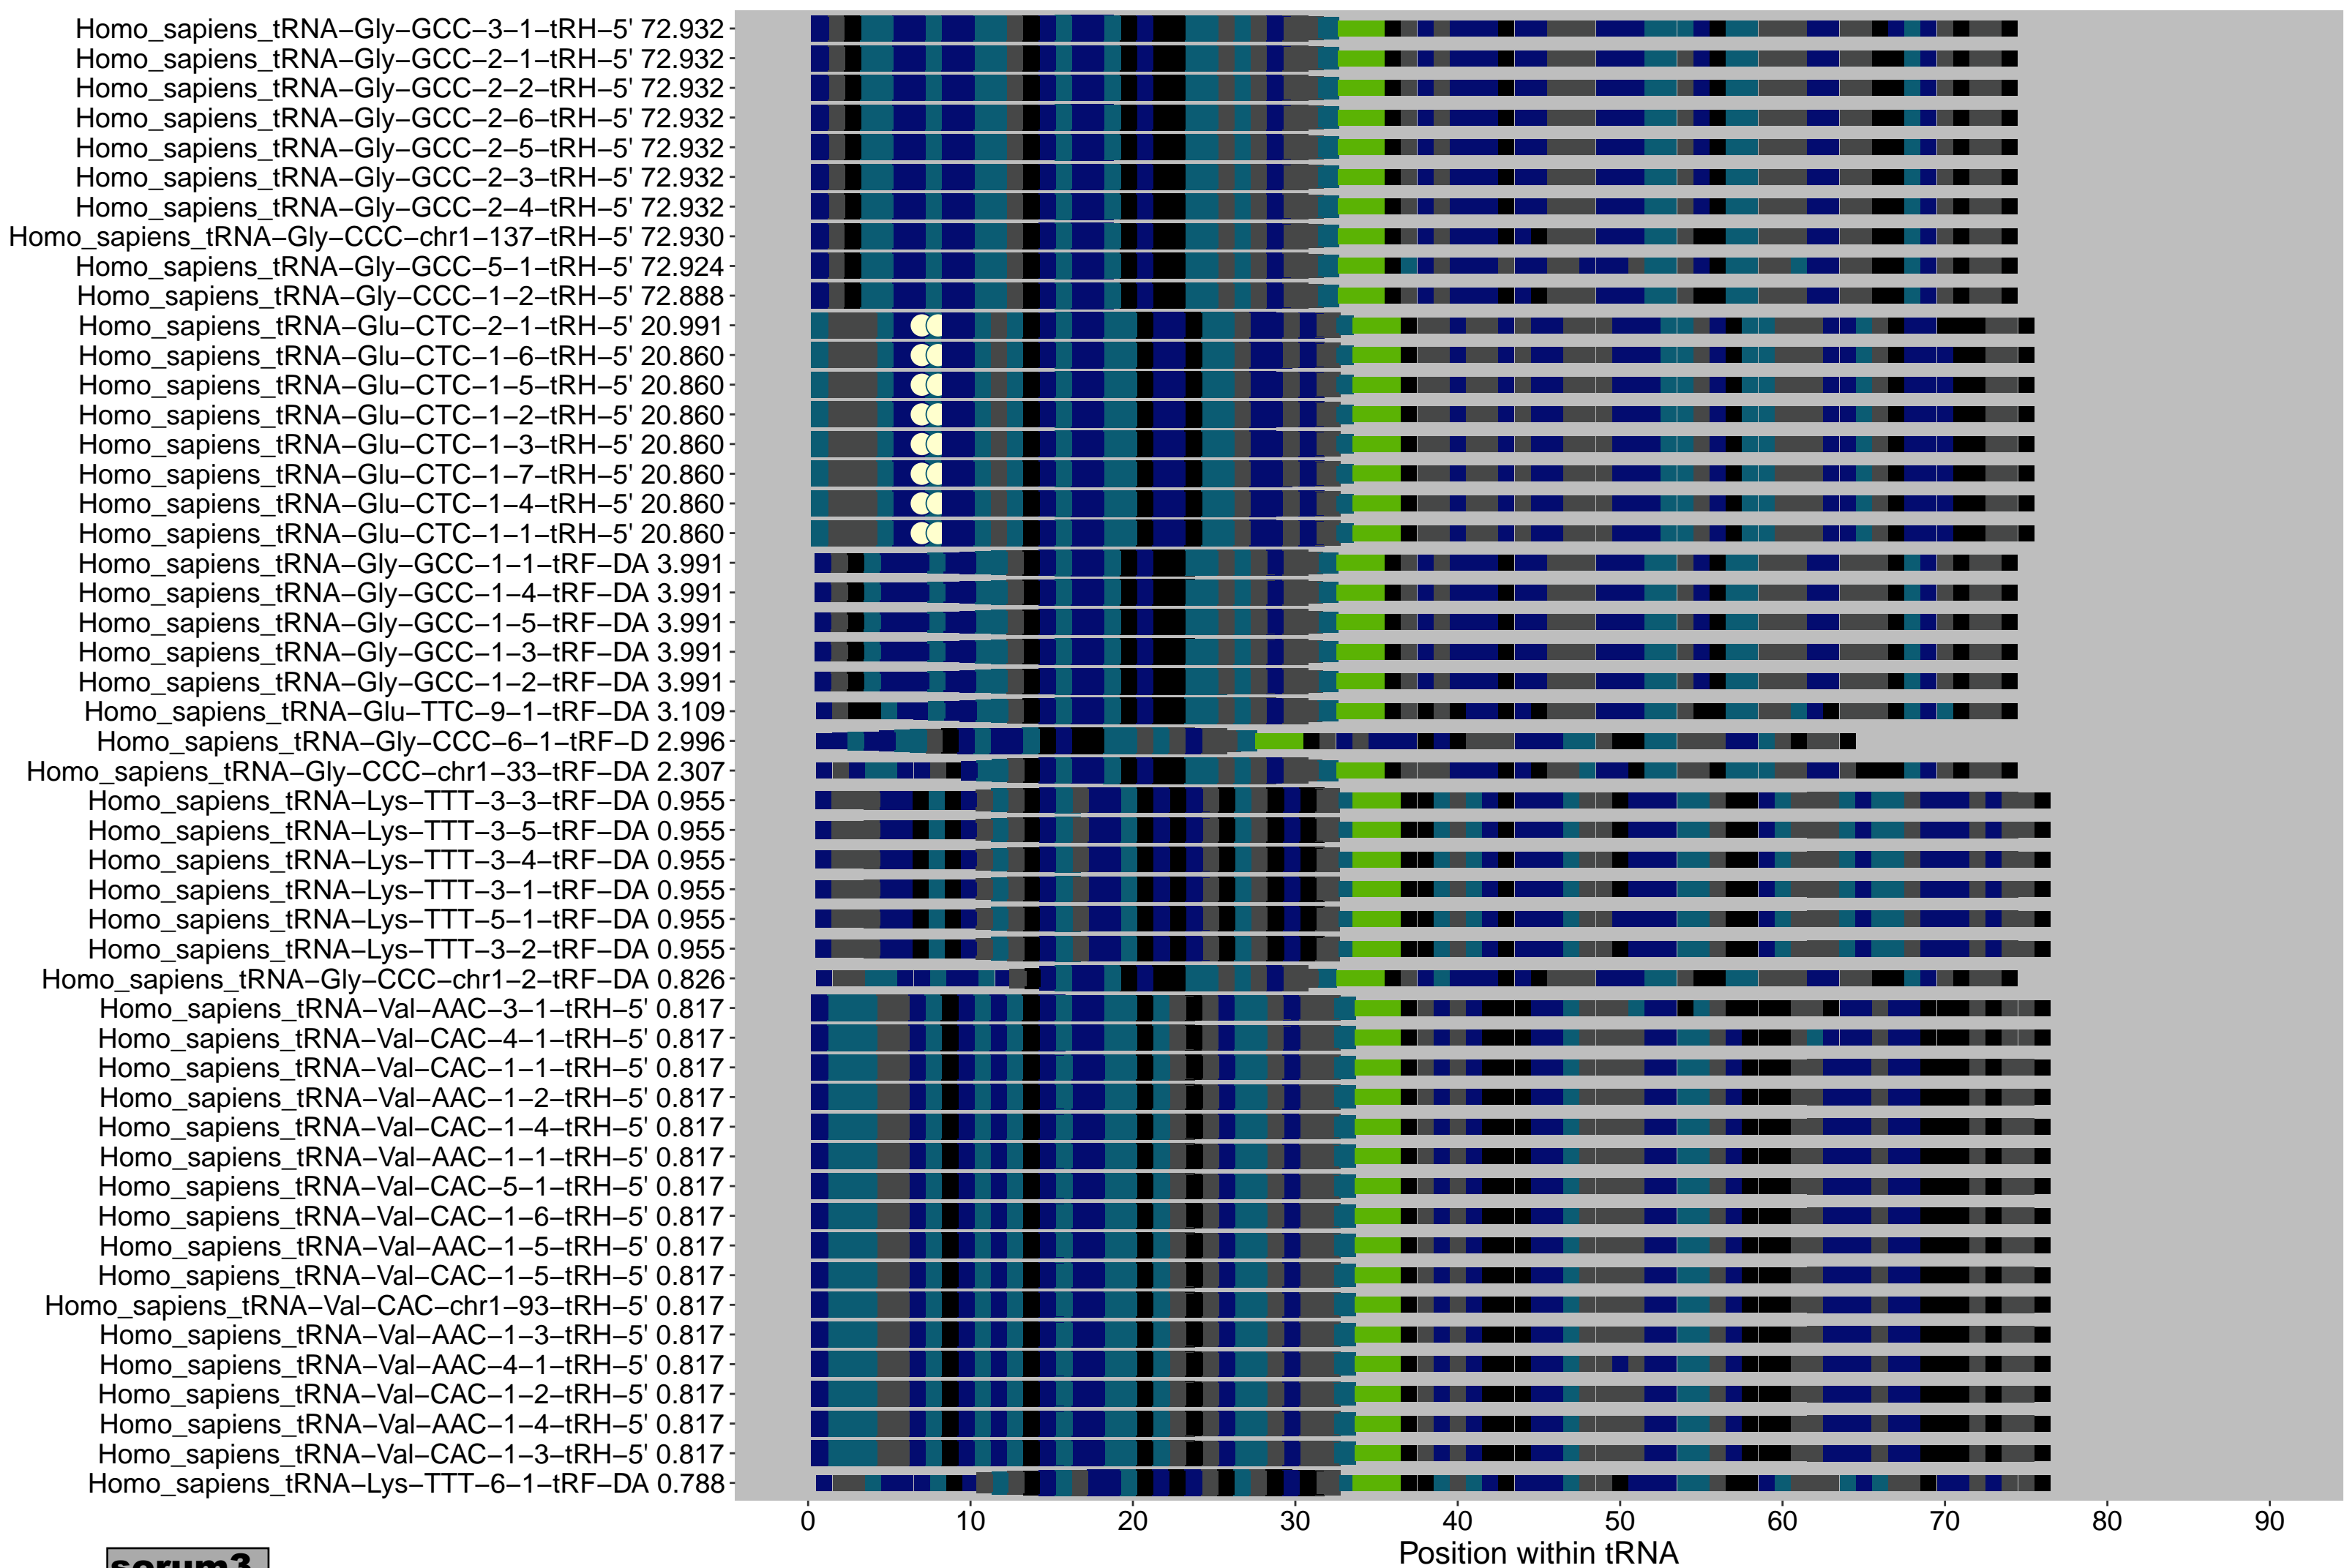

**serum3**



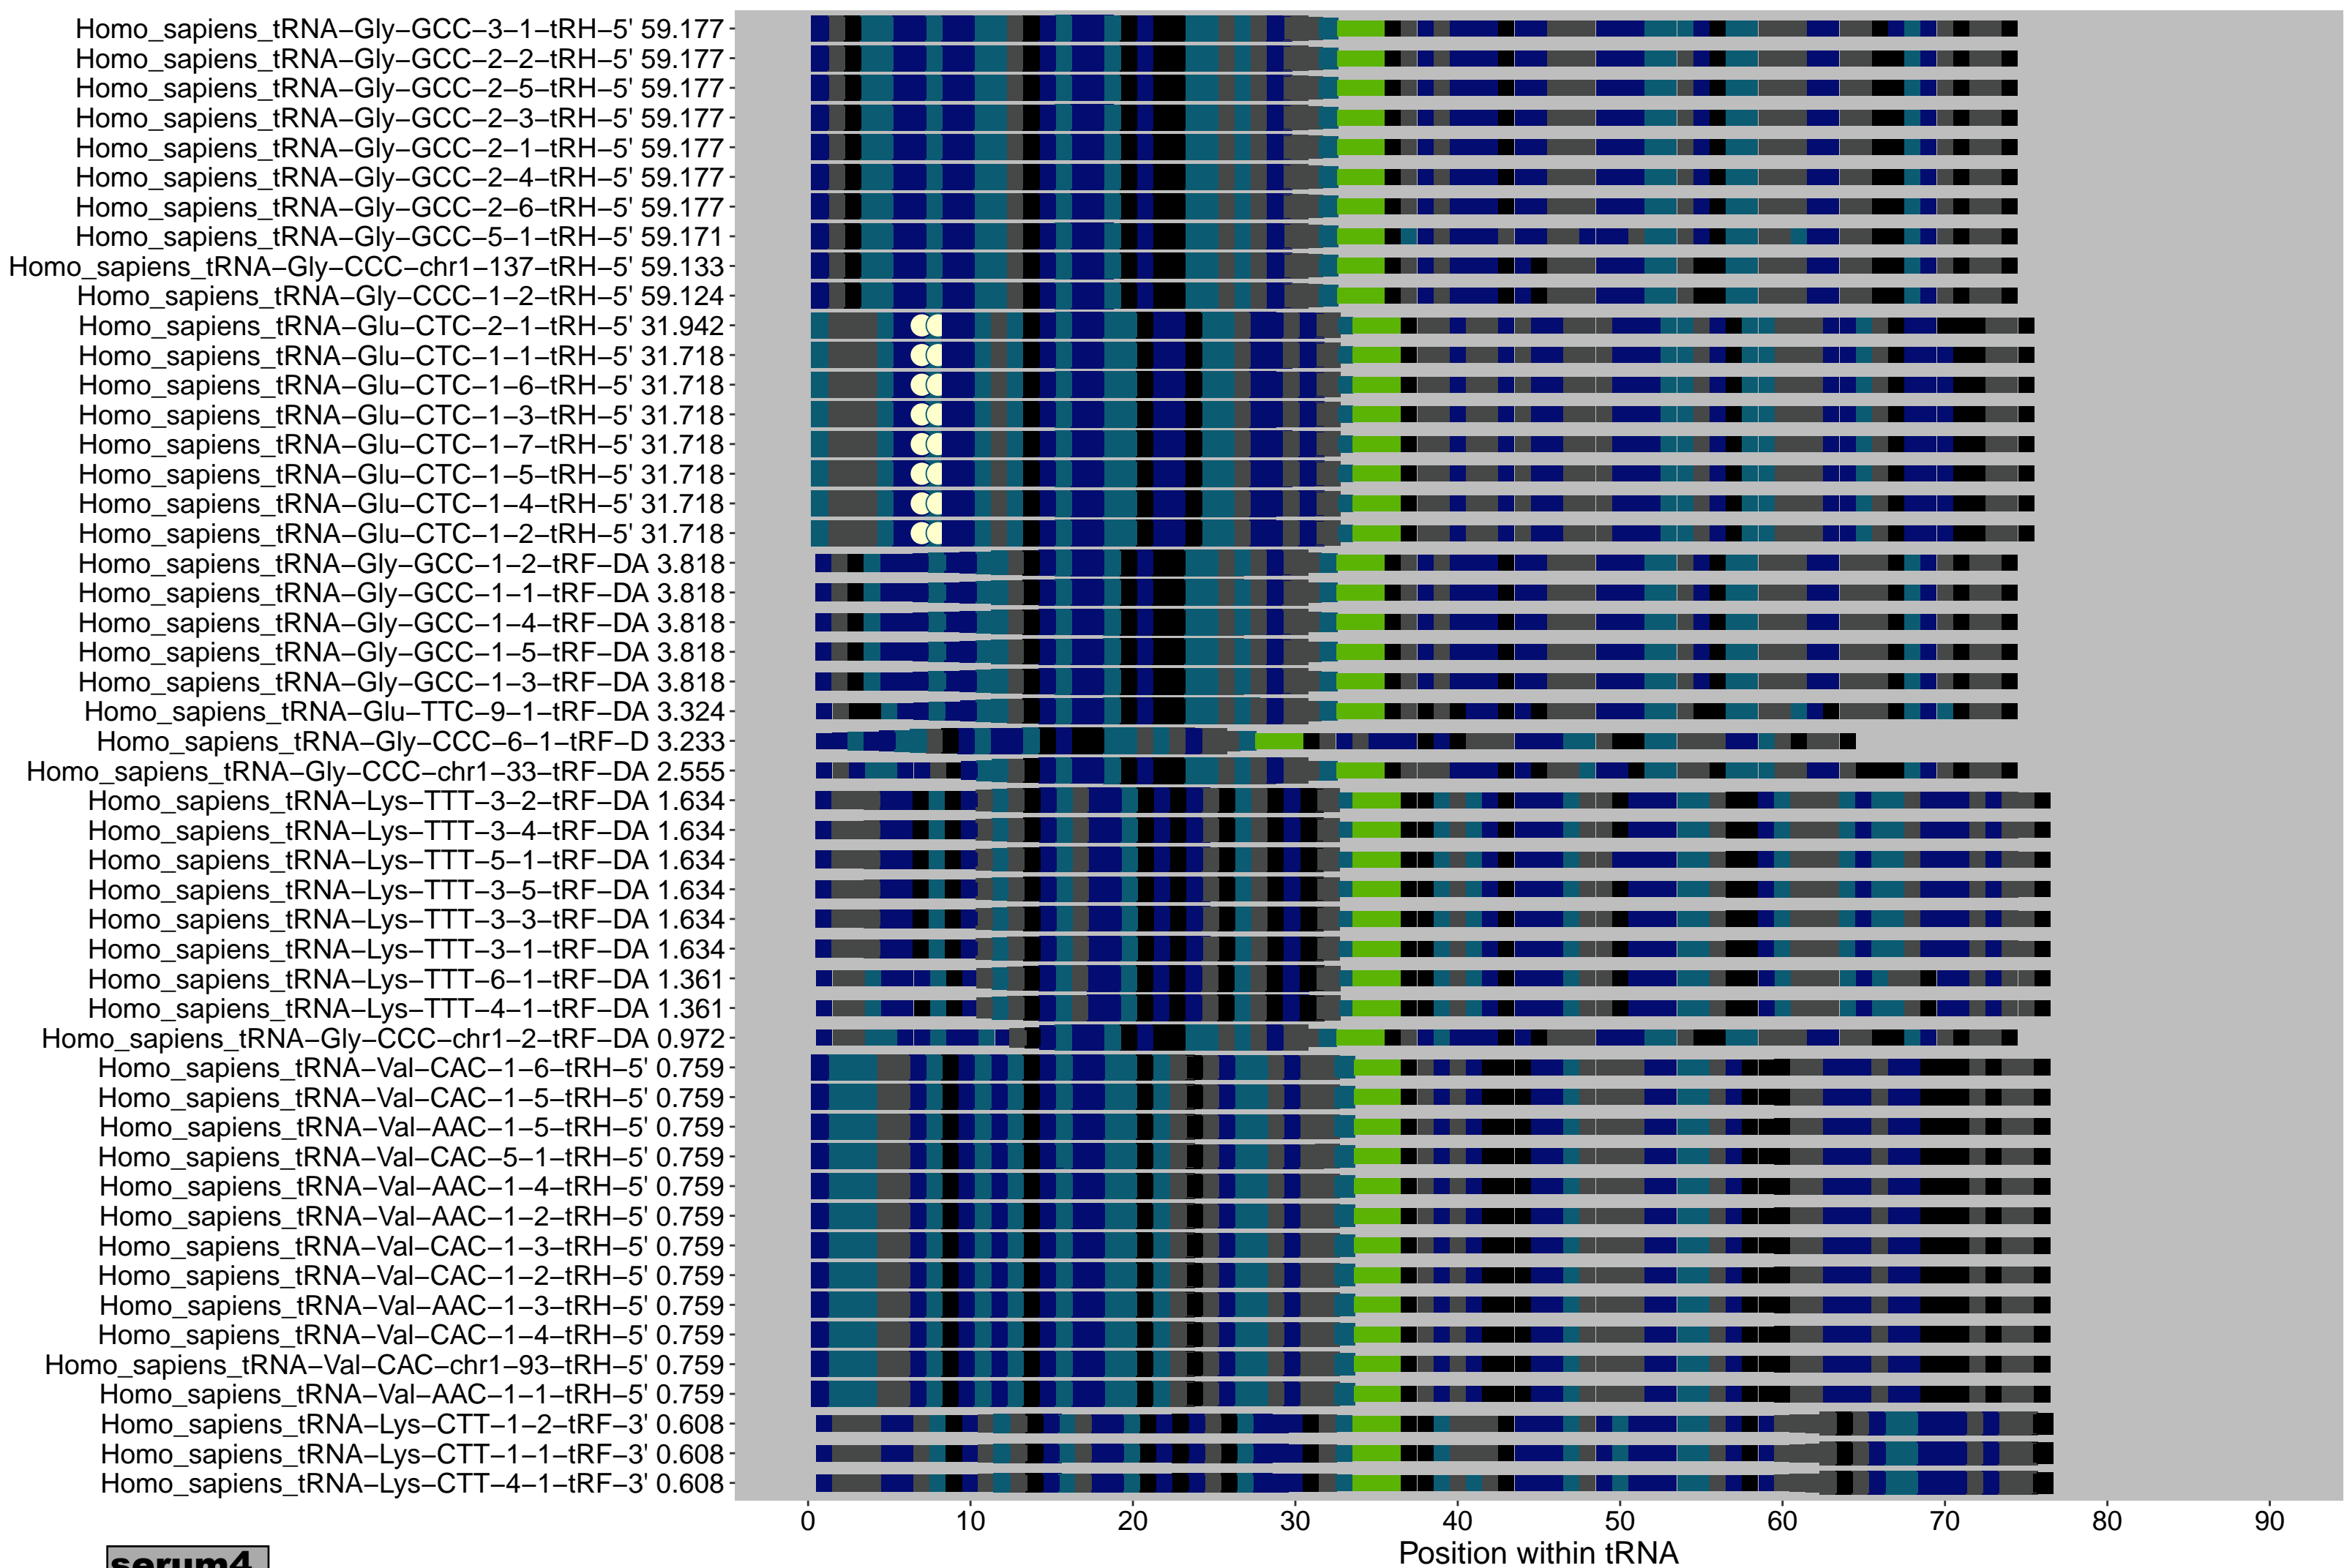



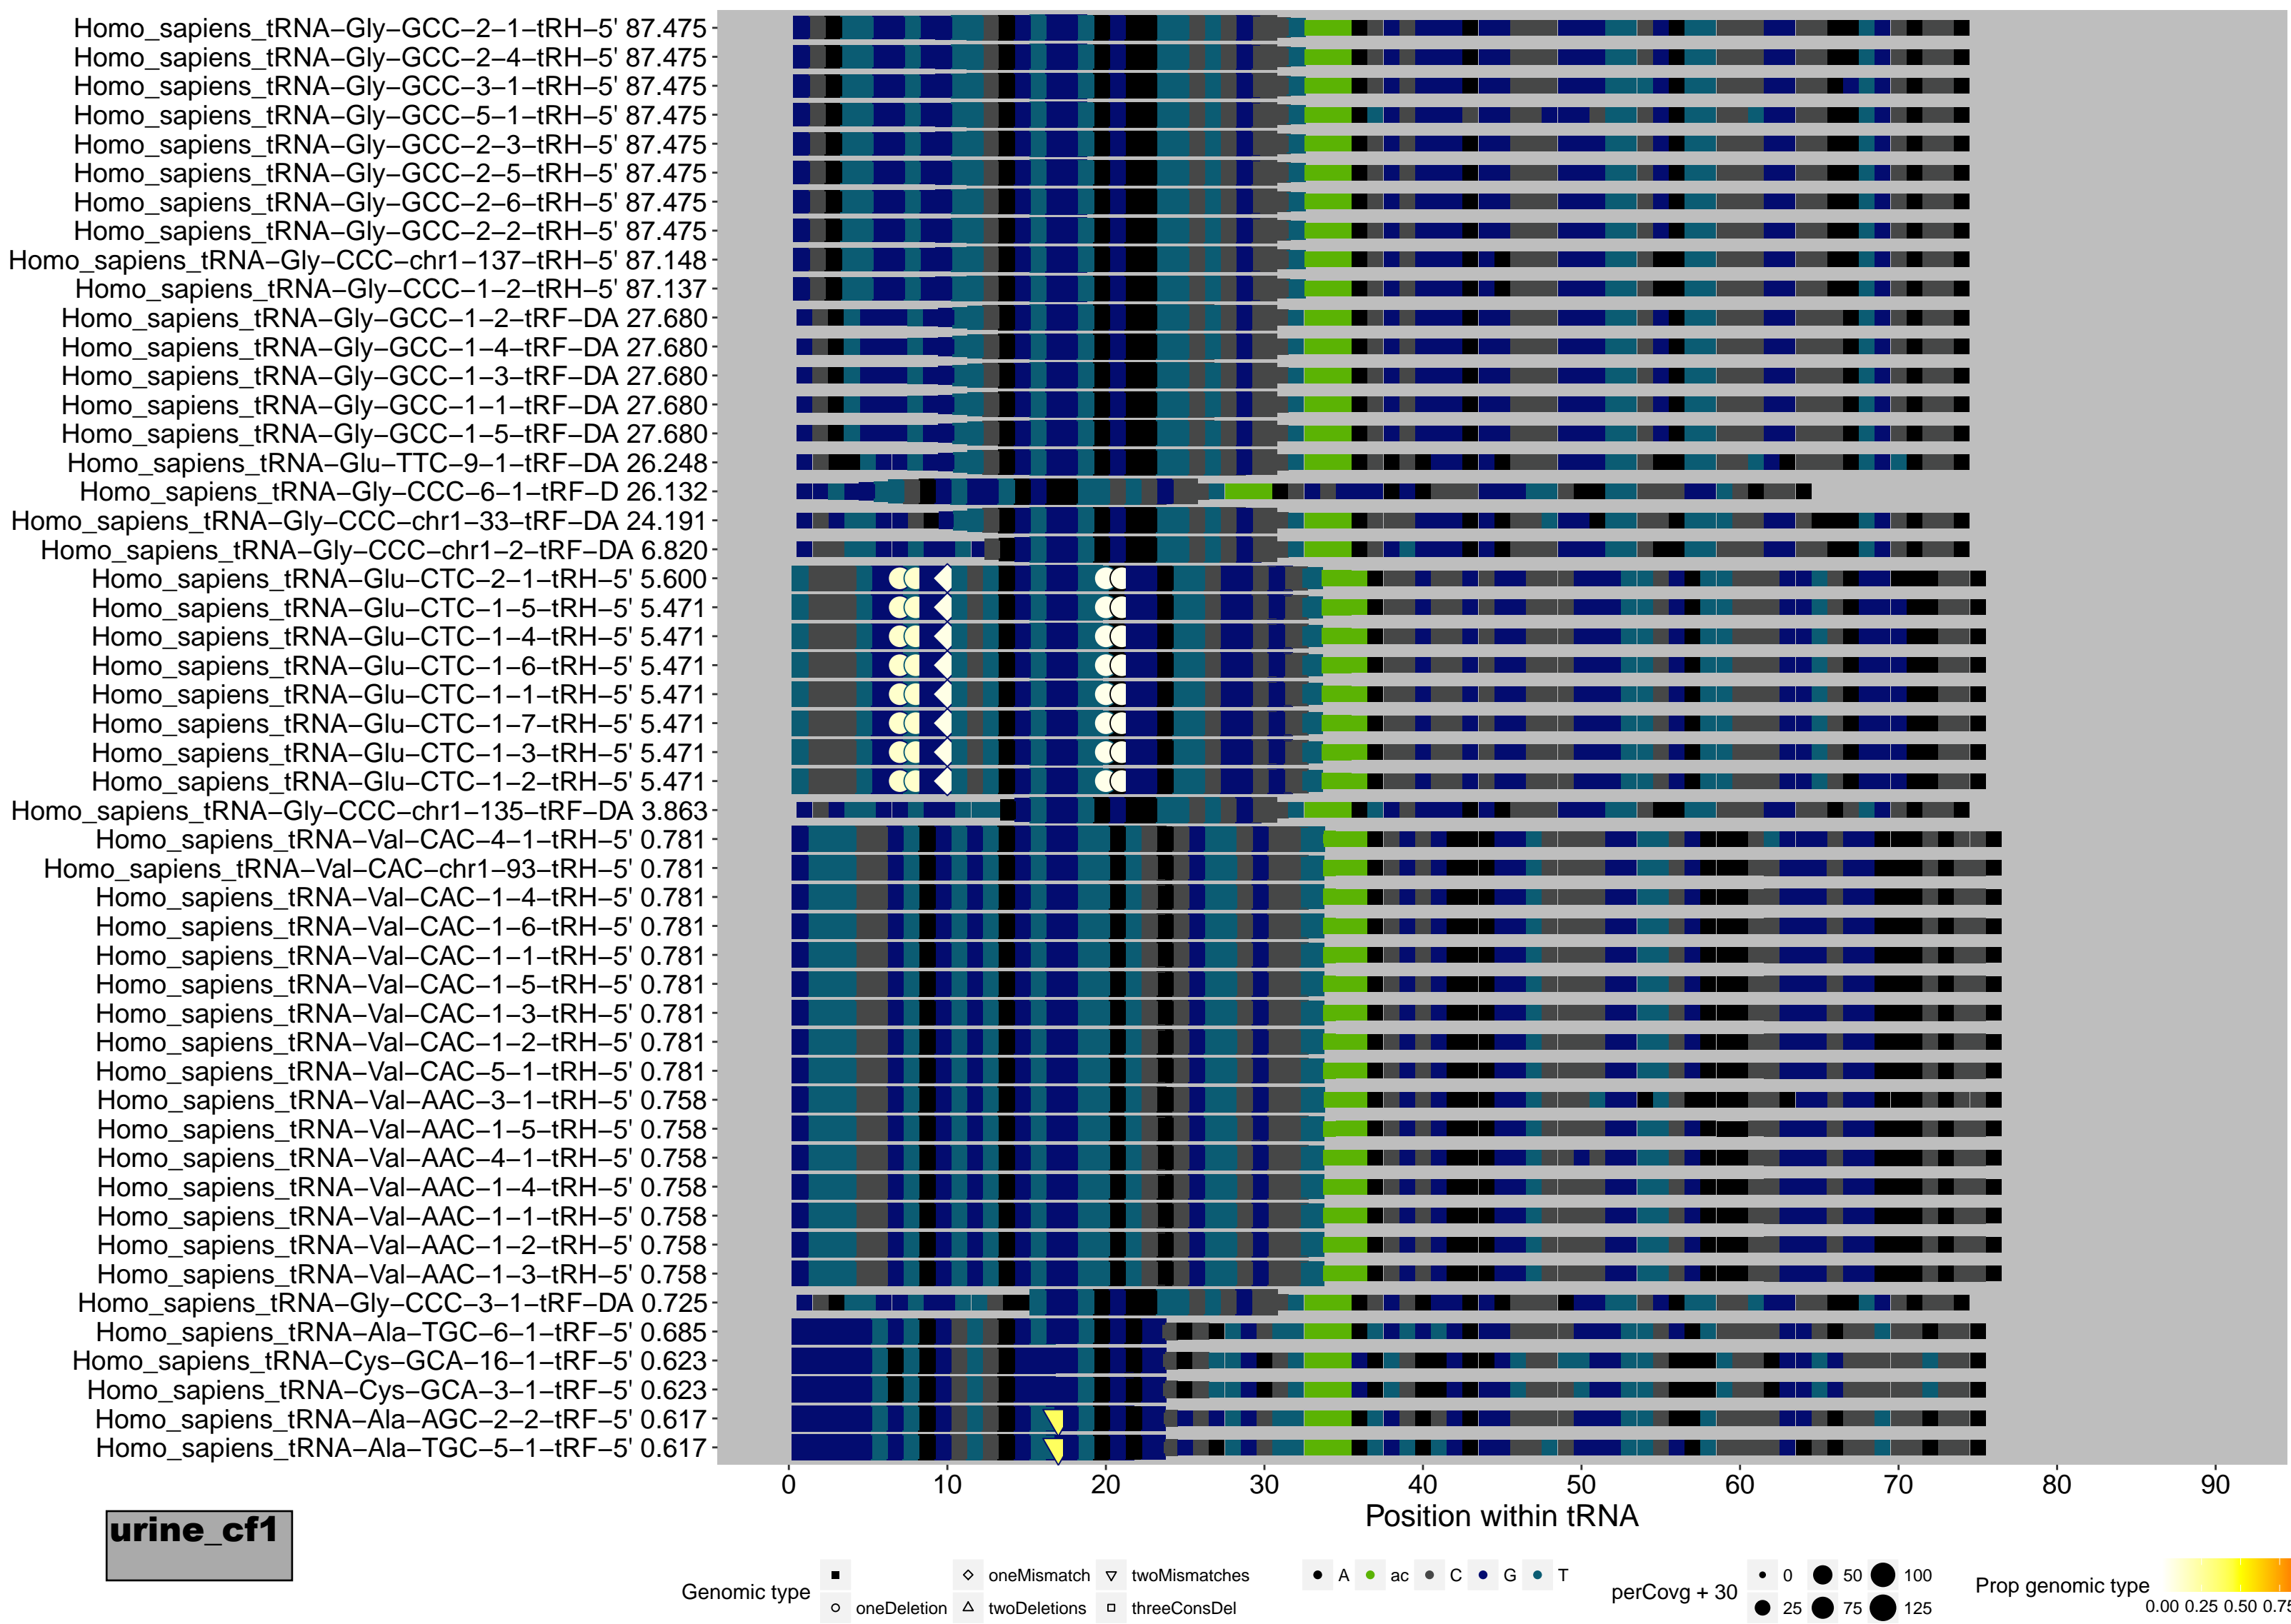

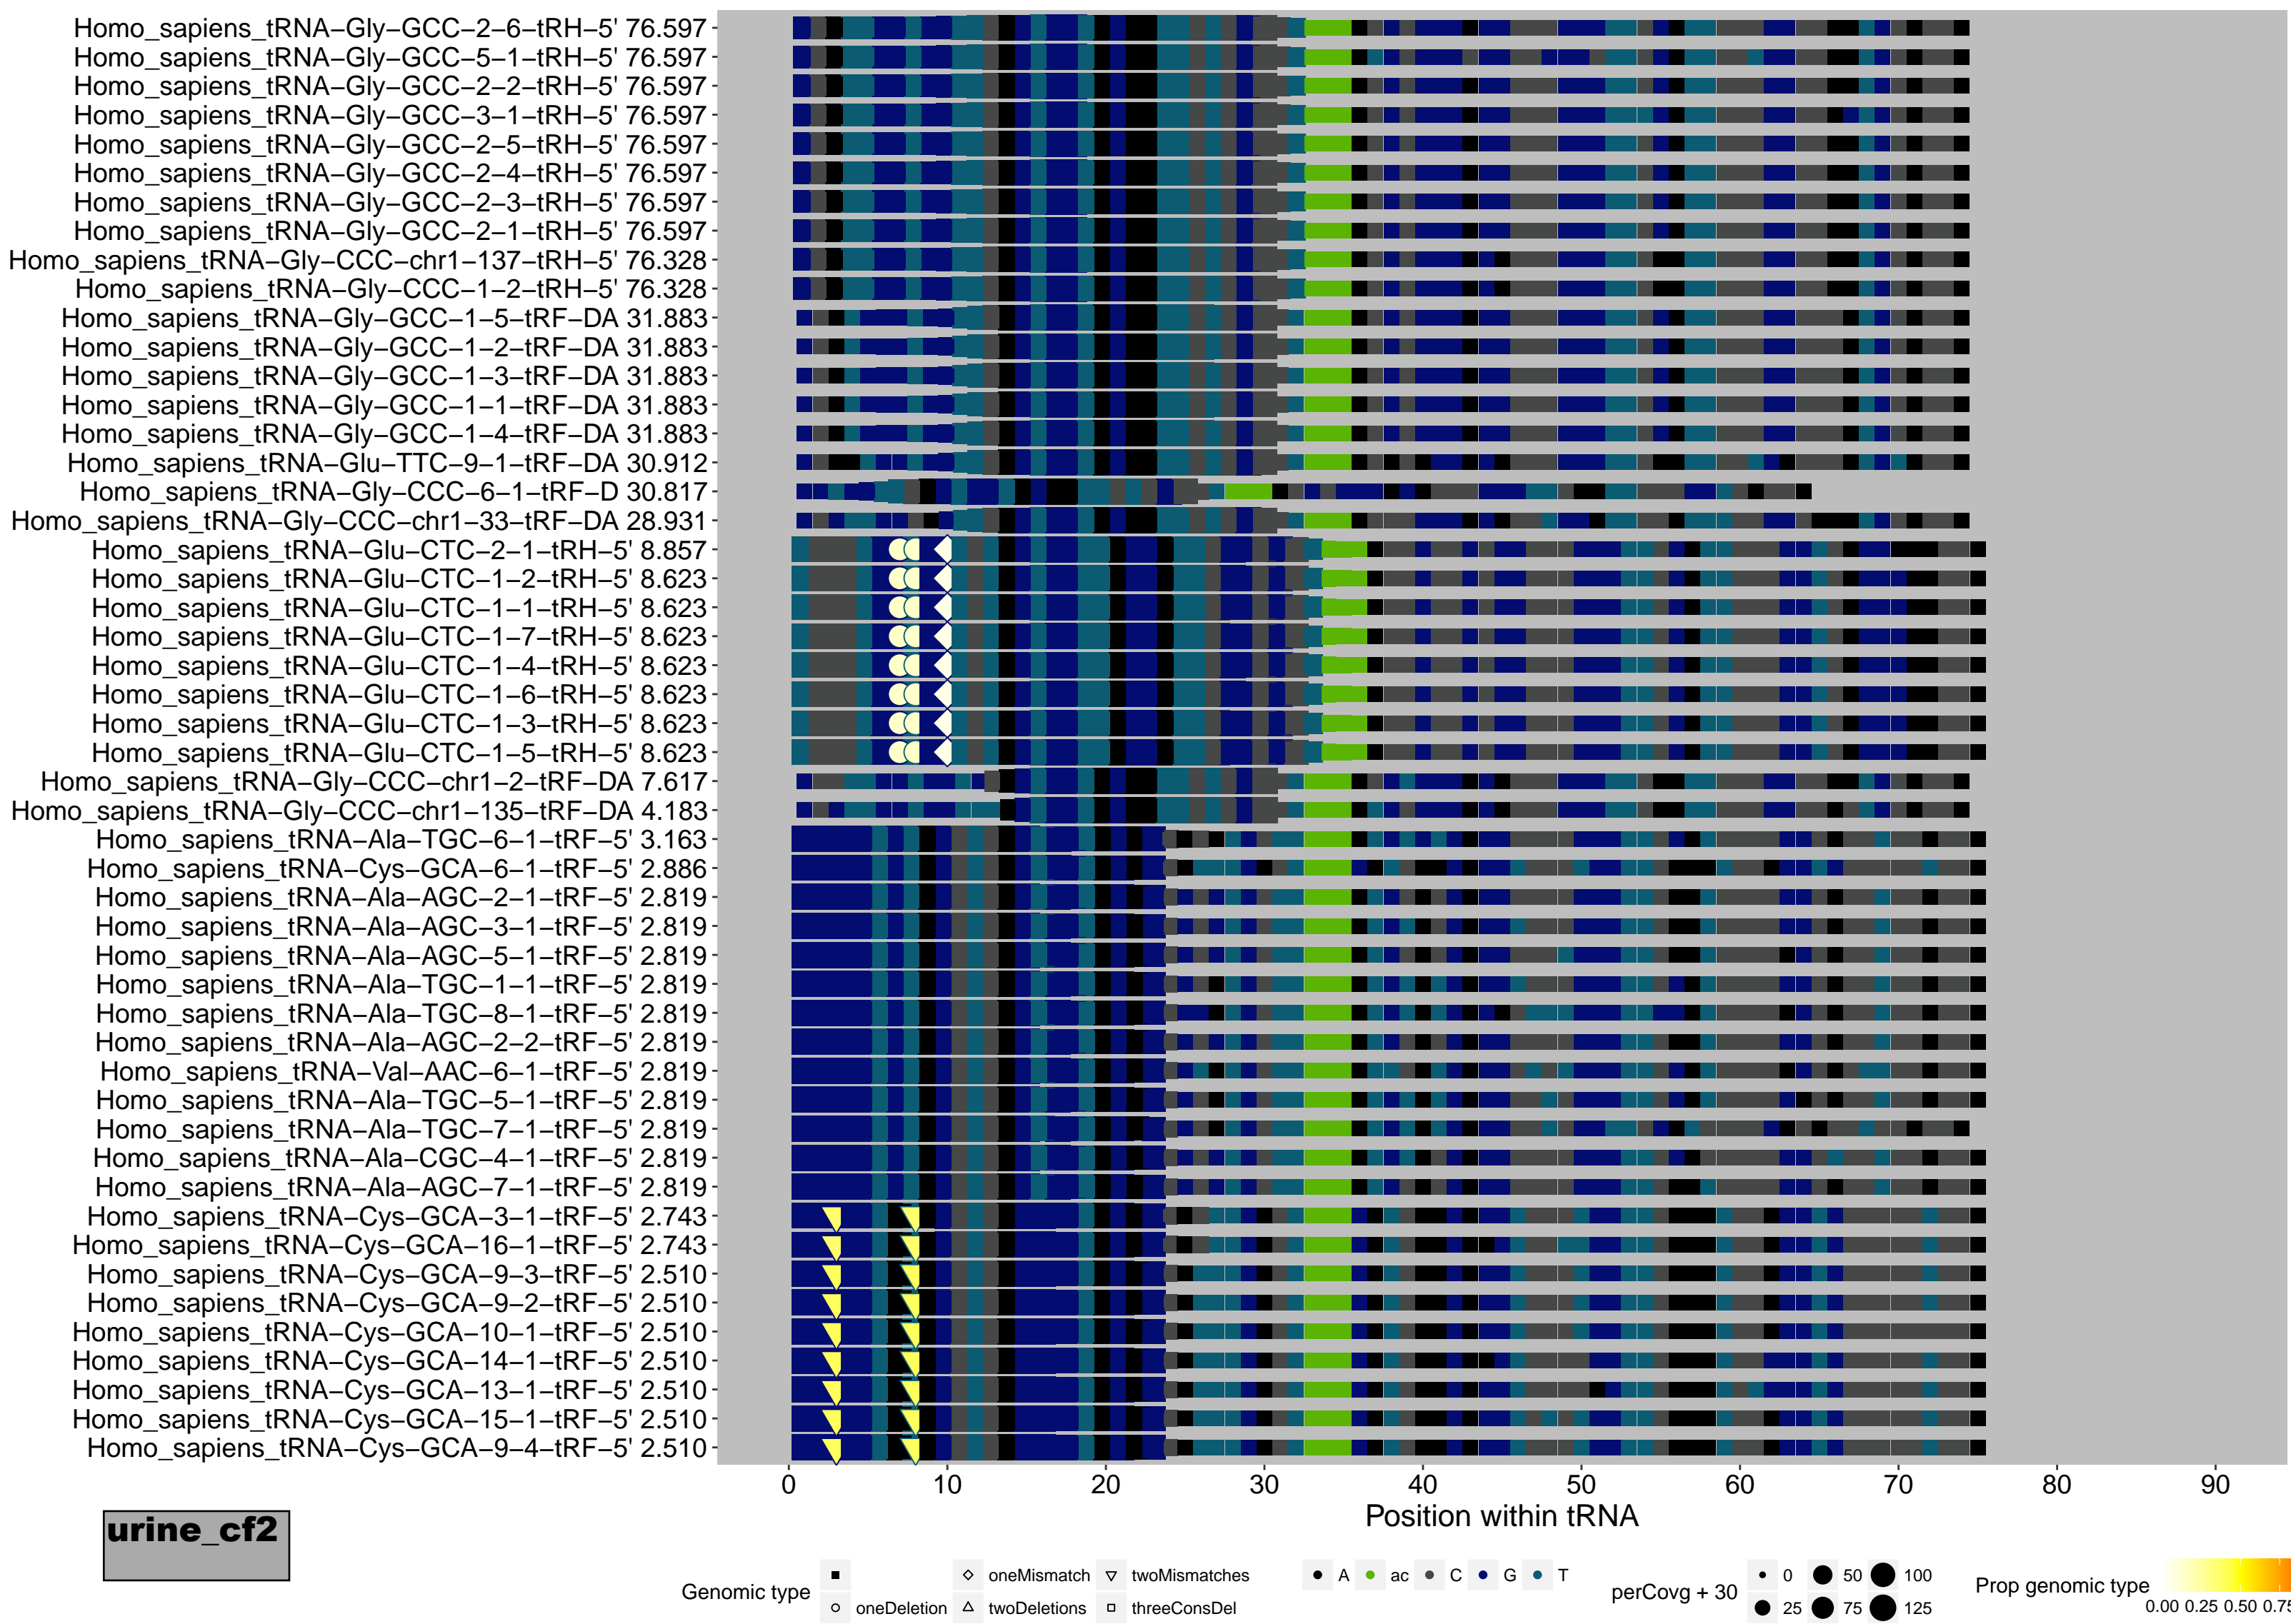

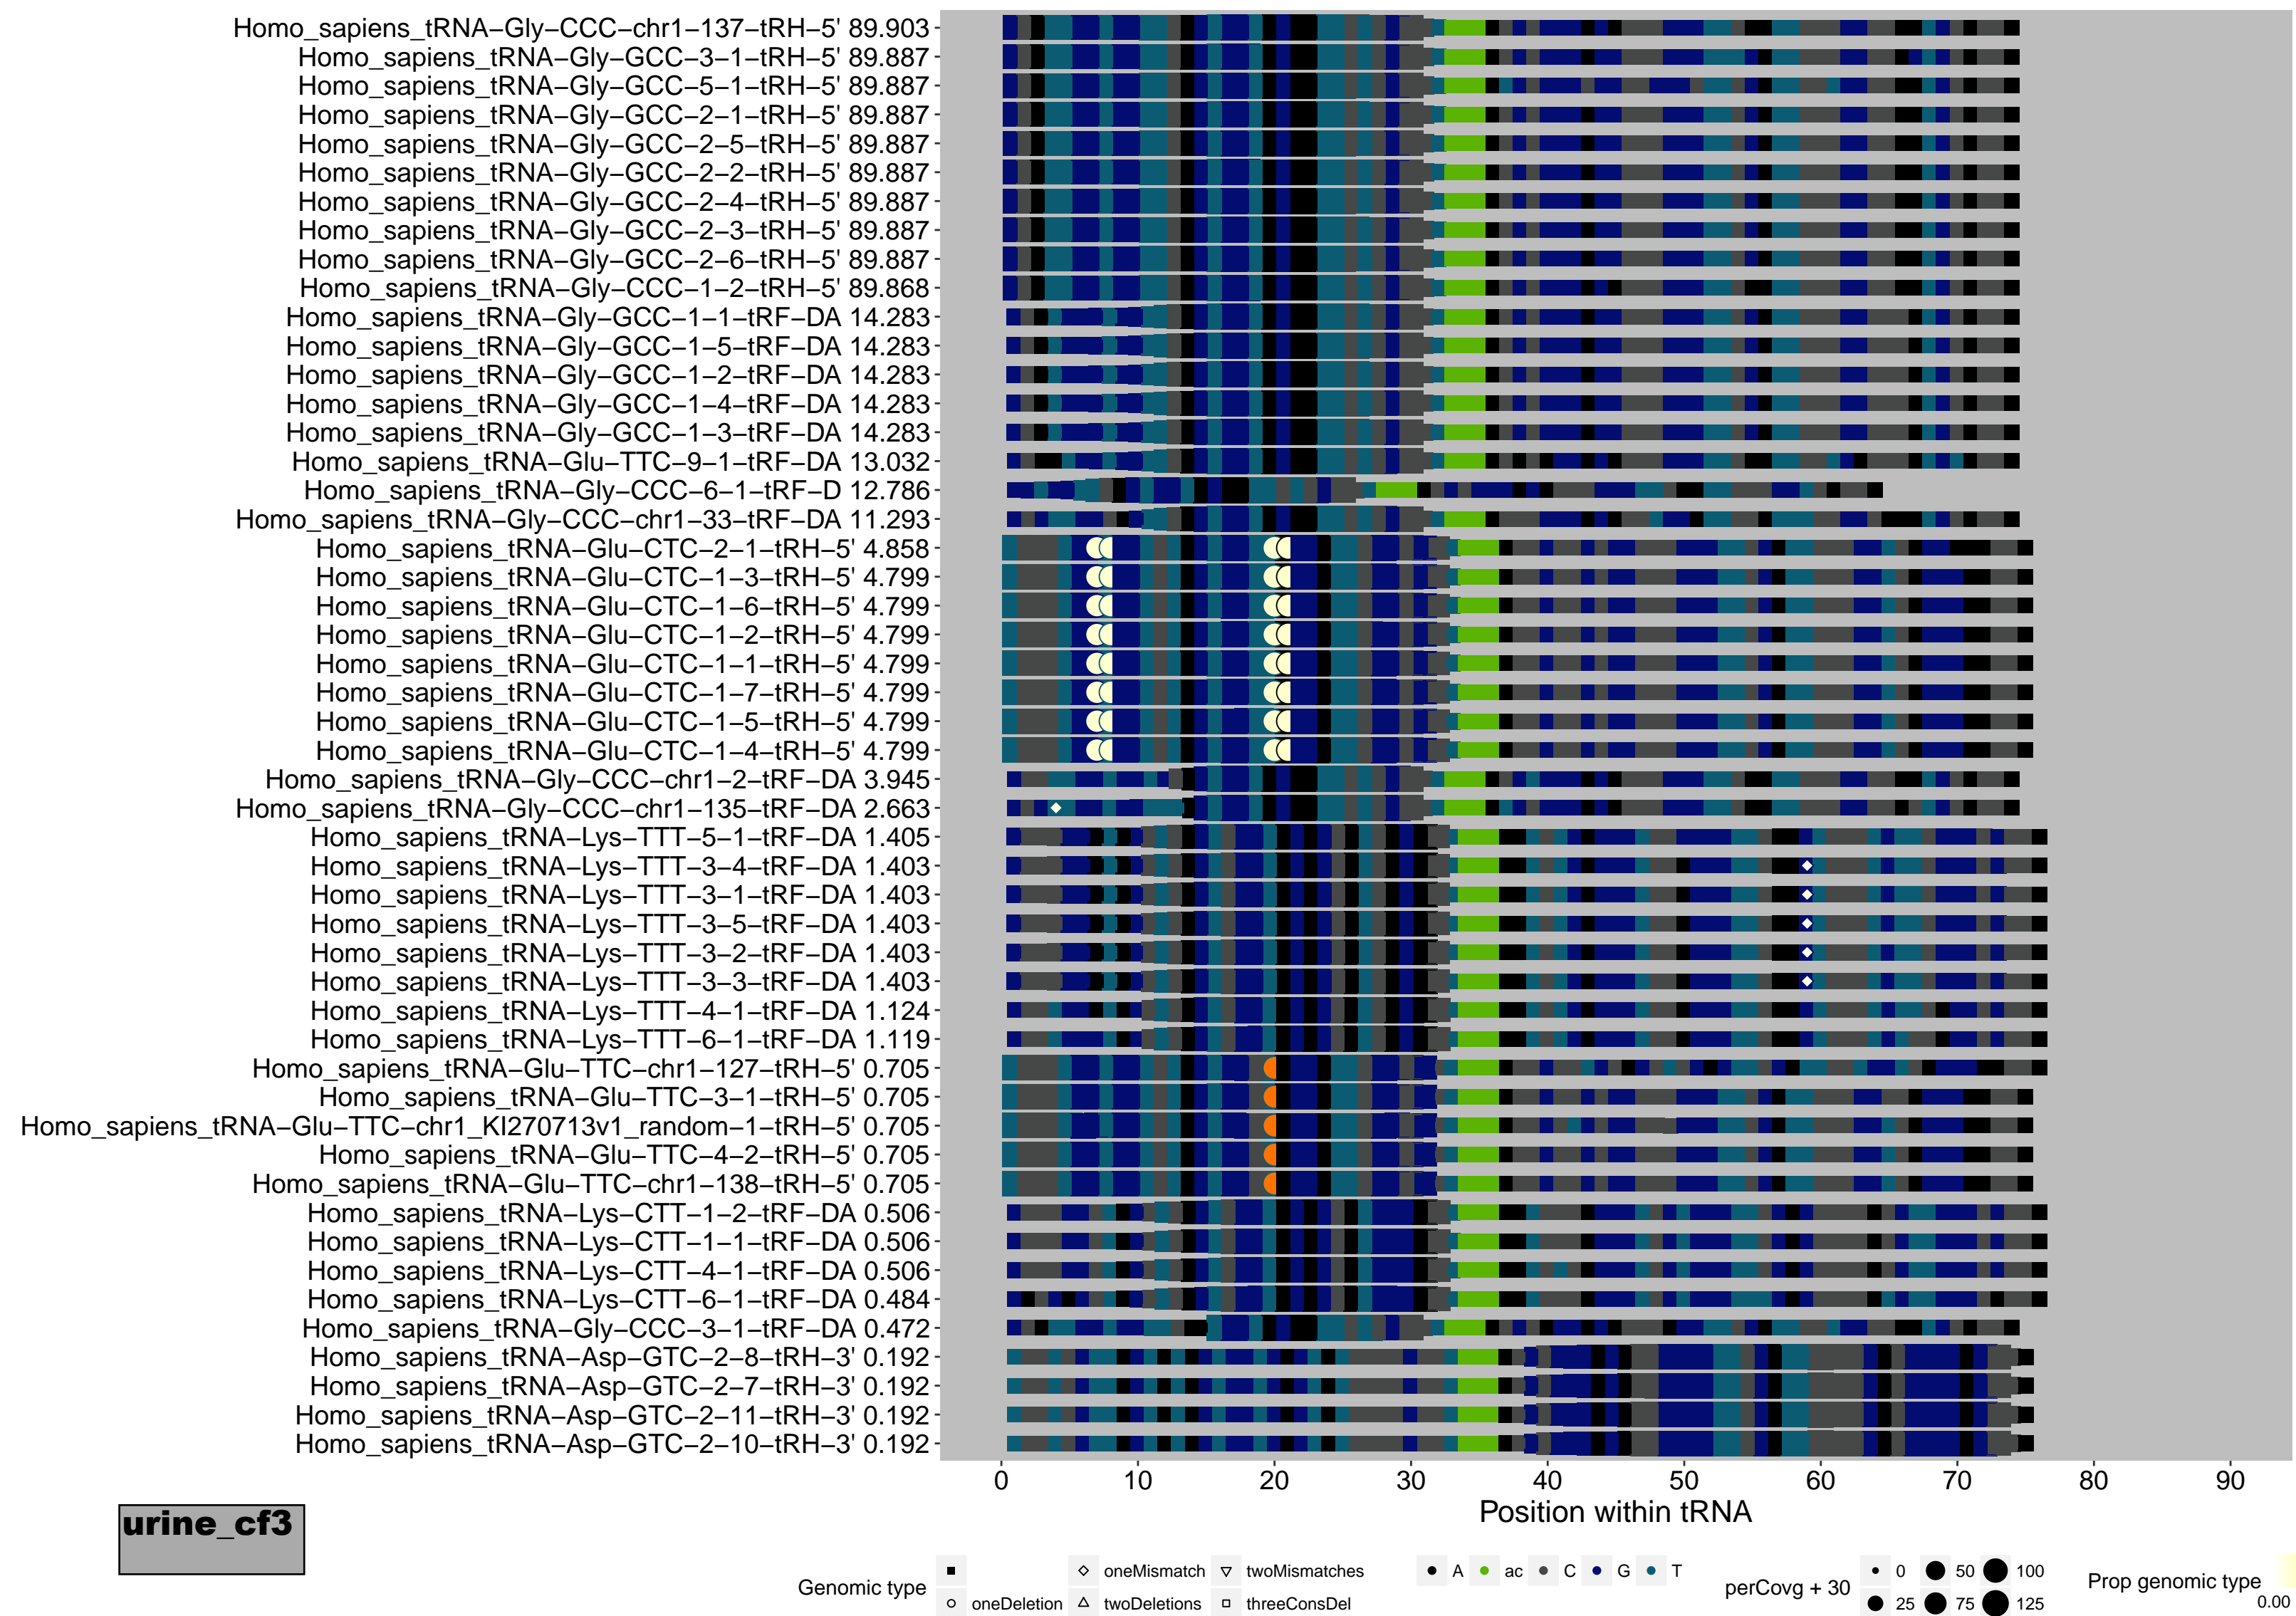

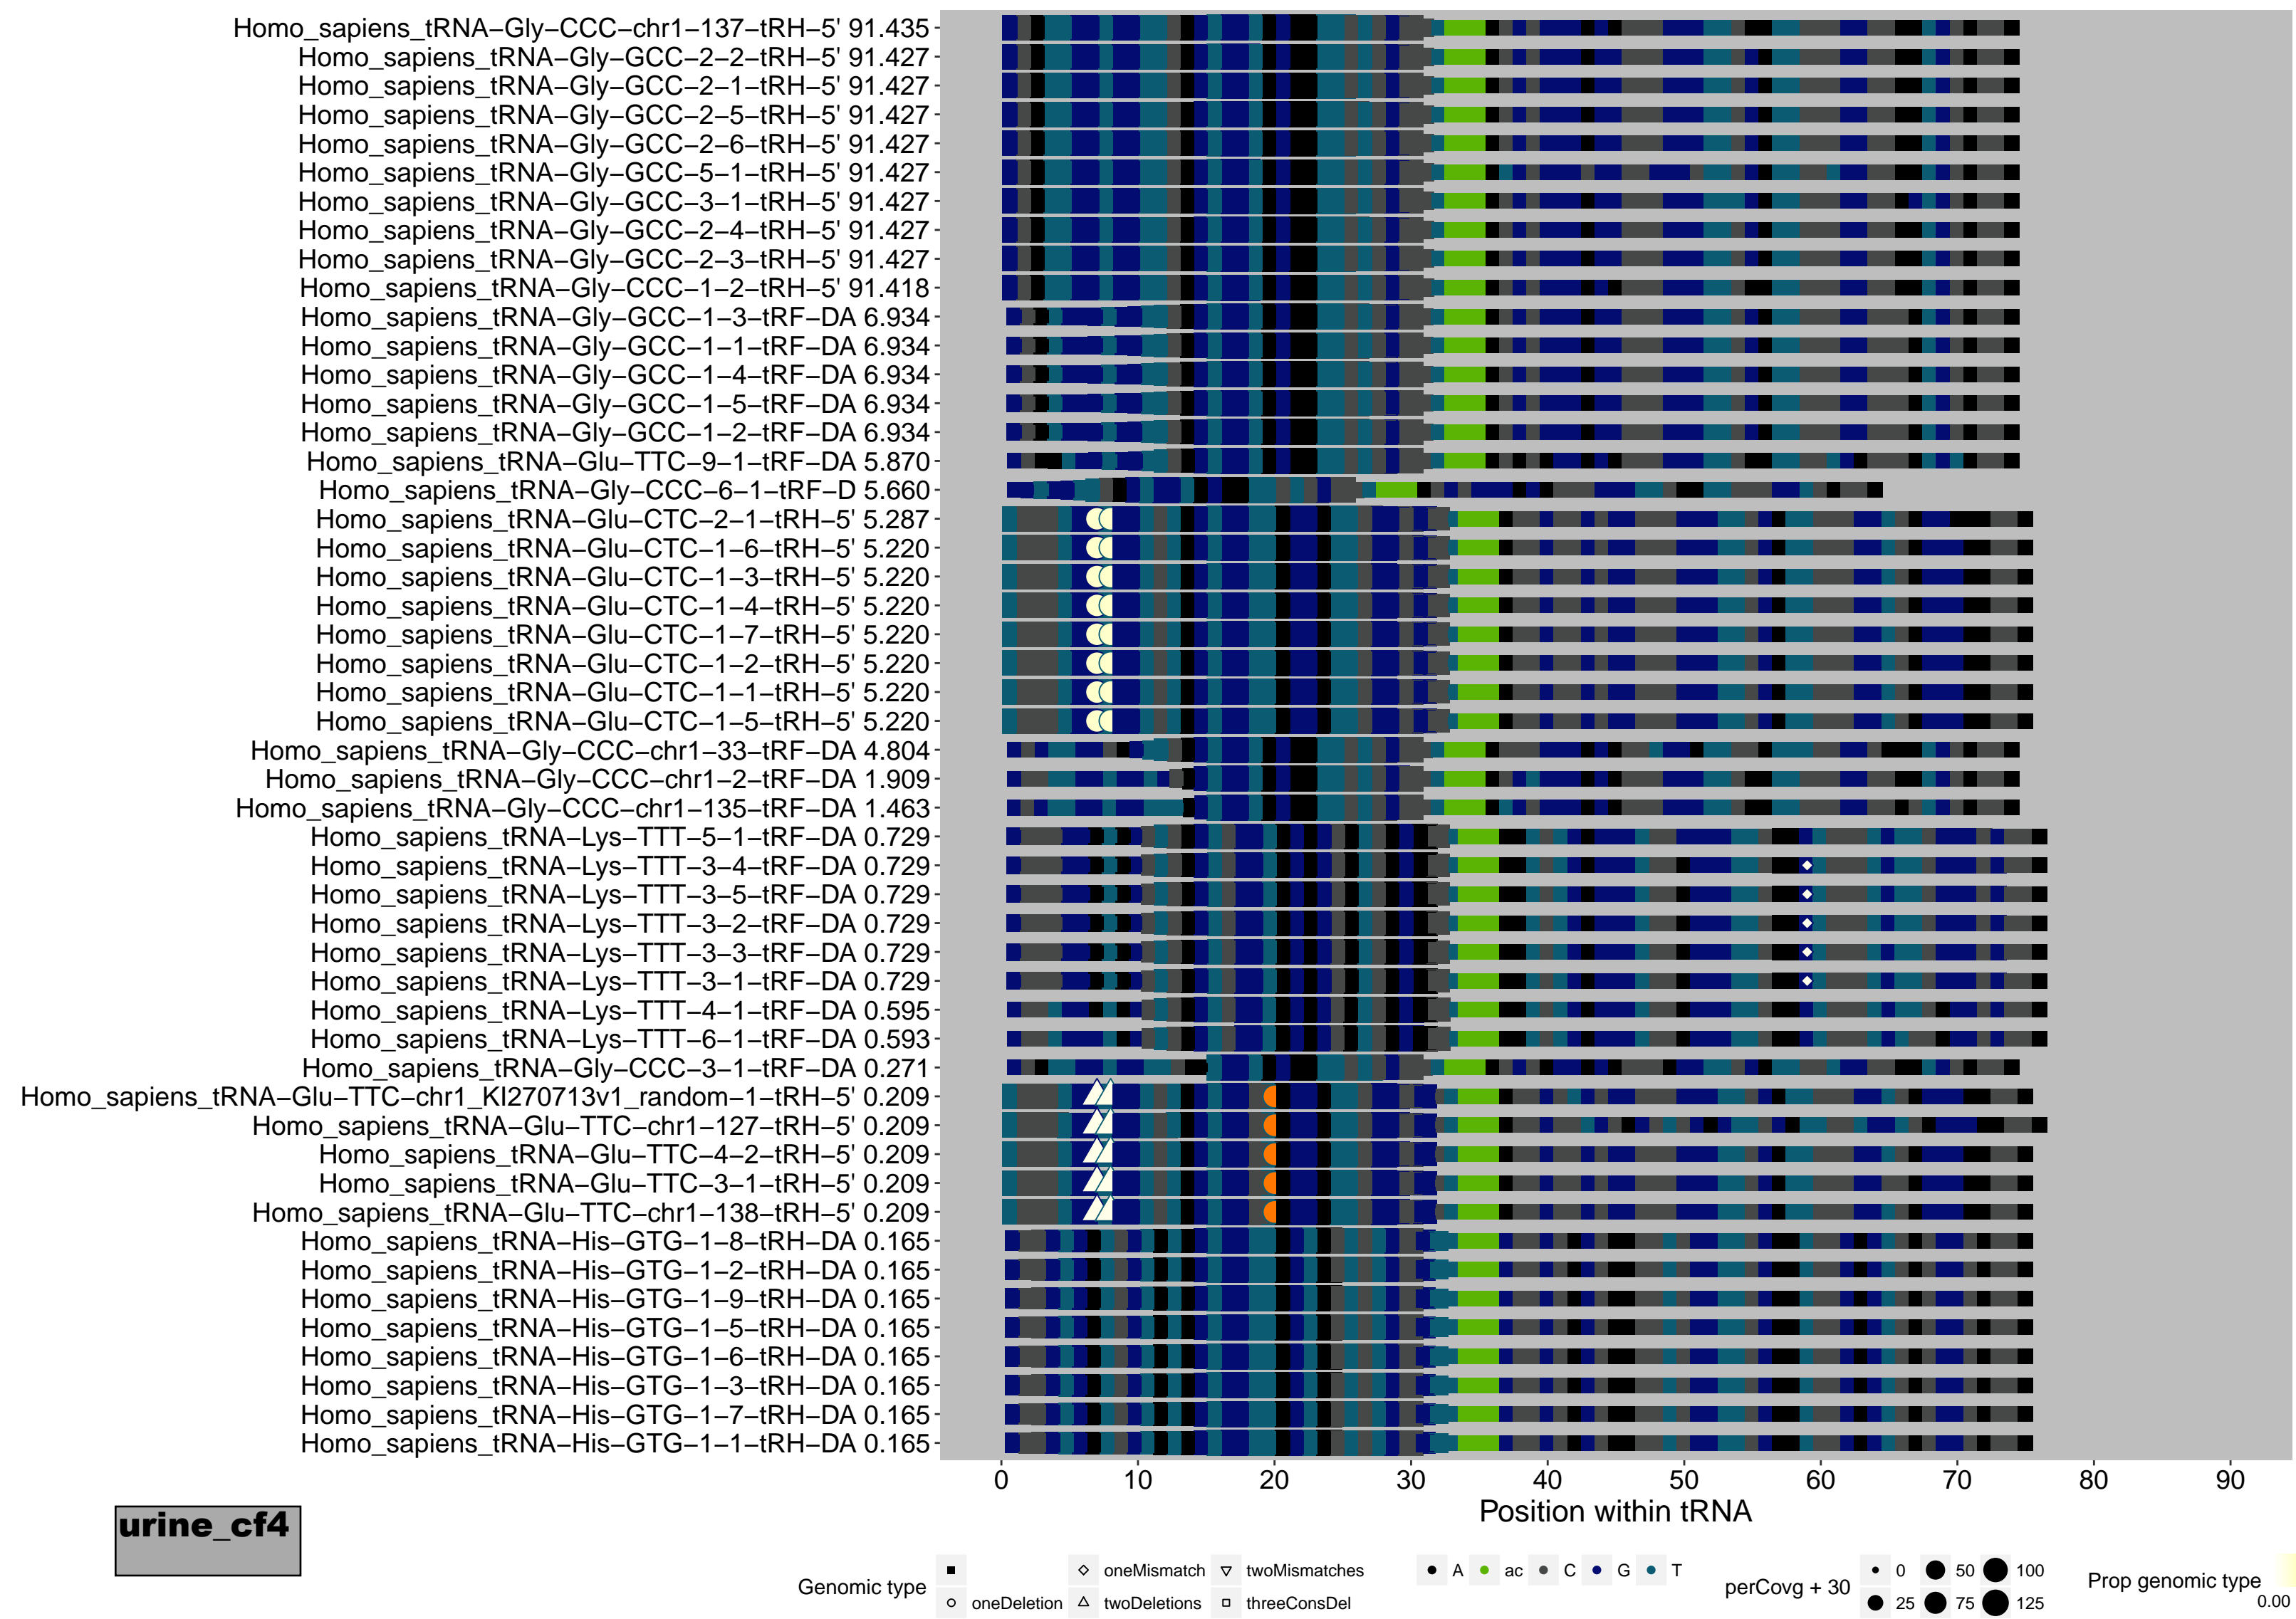

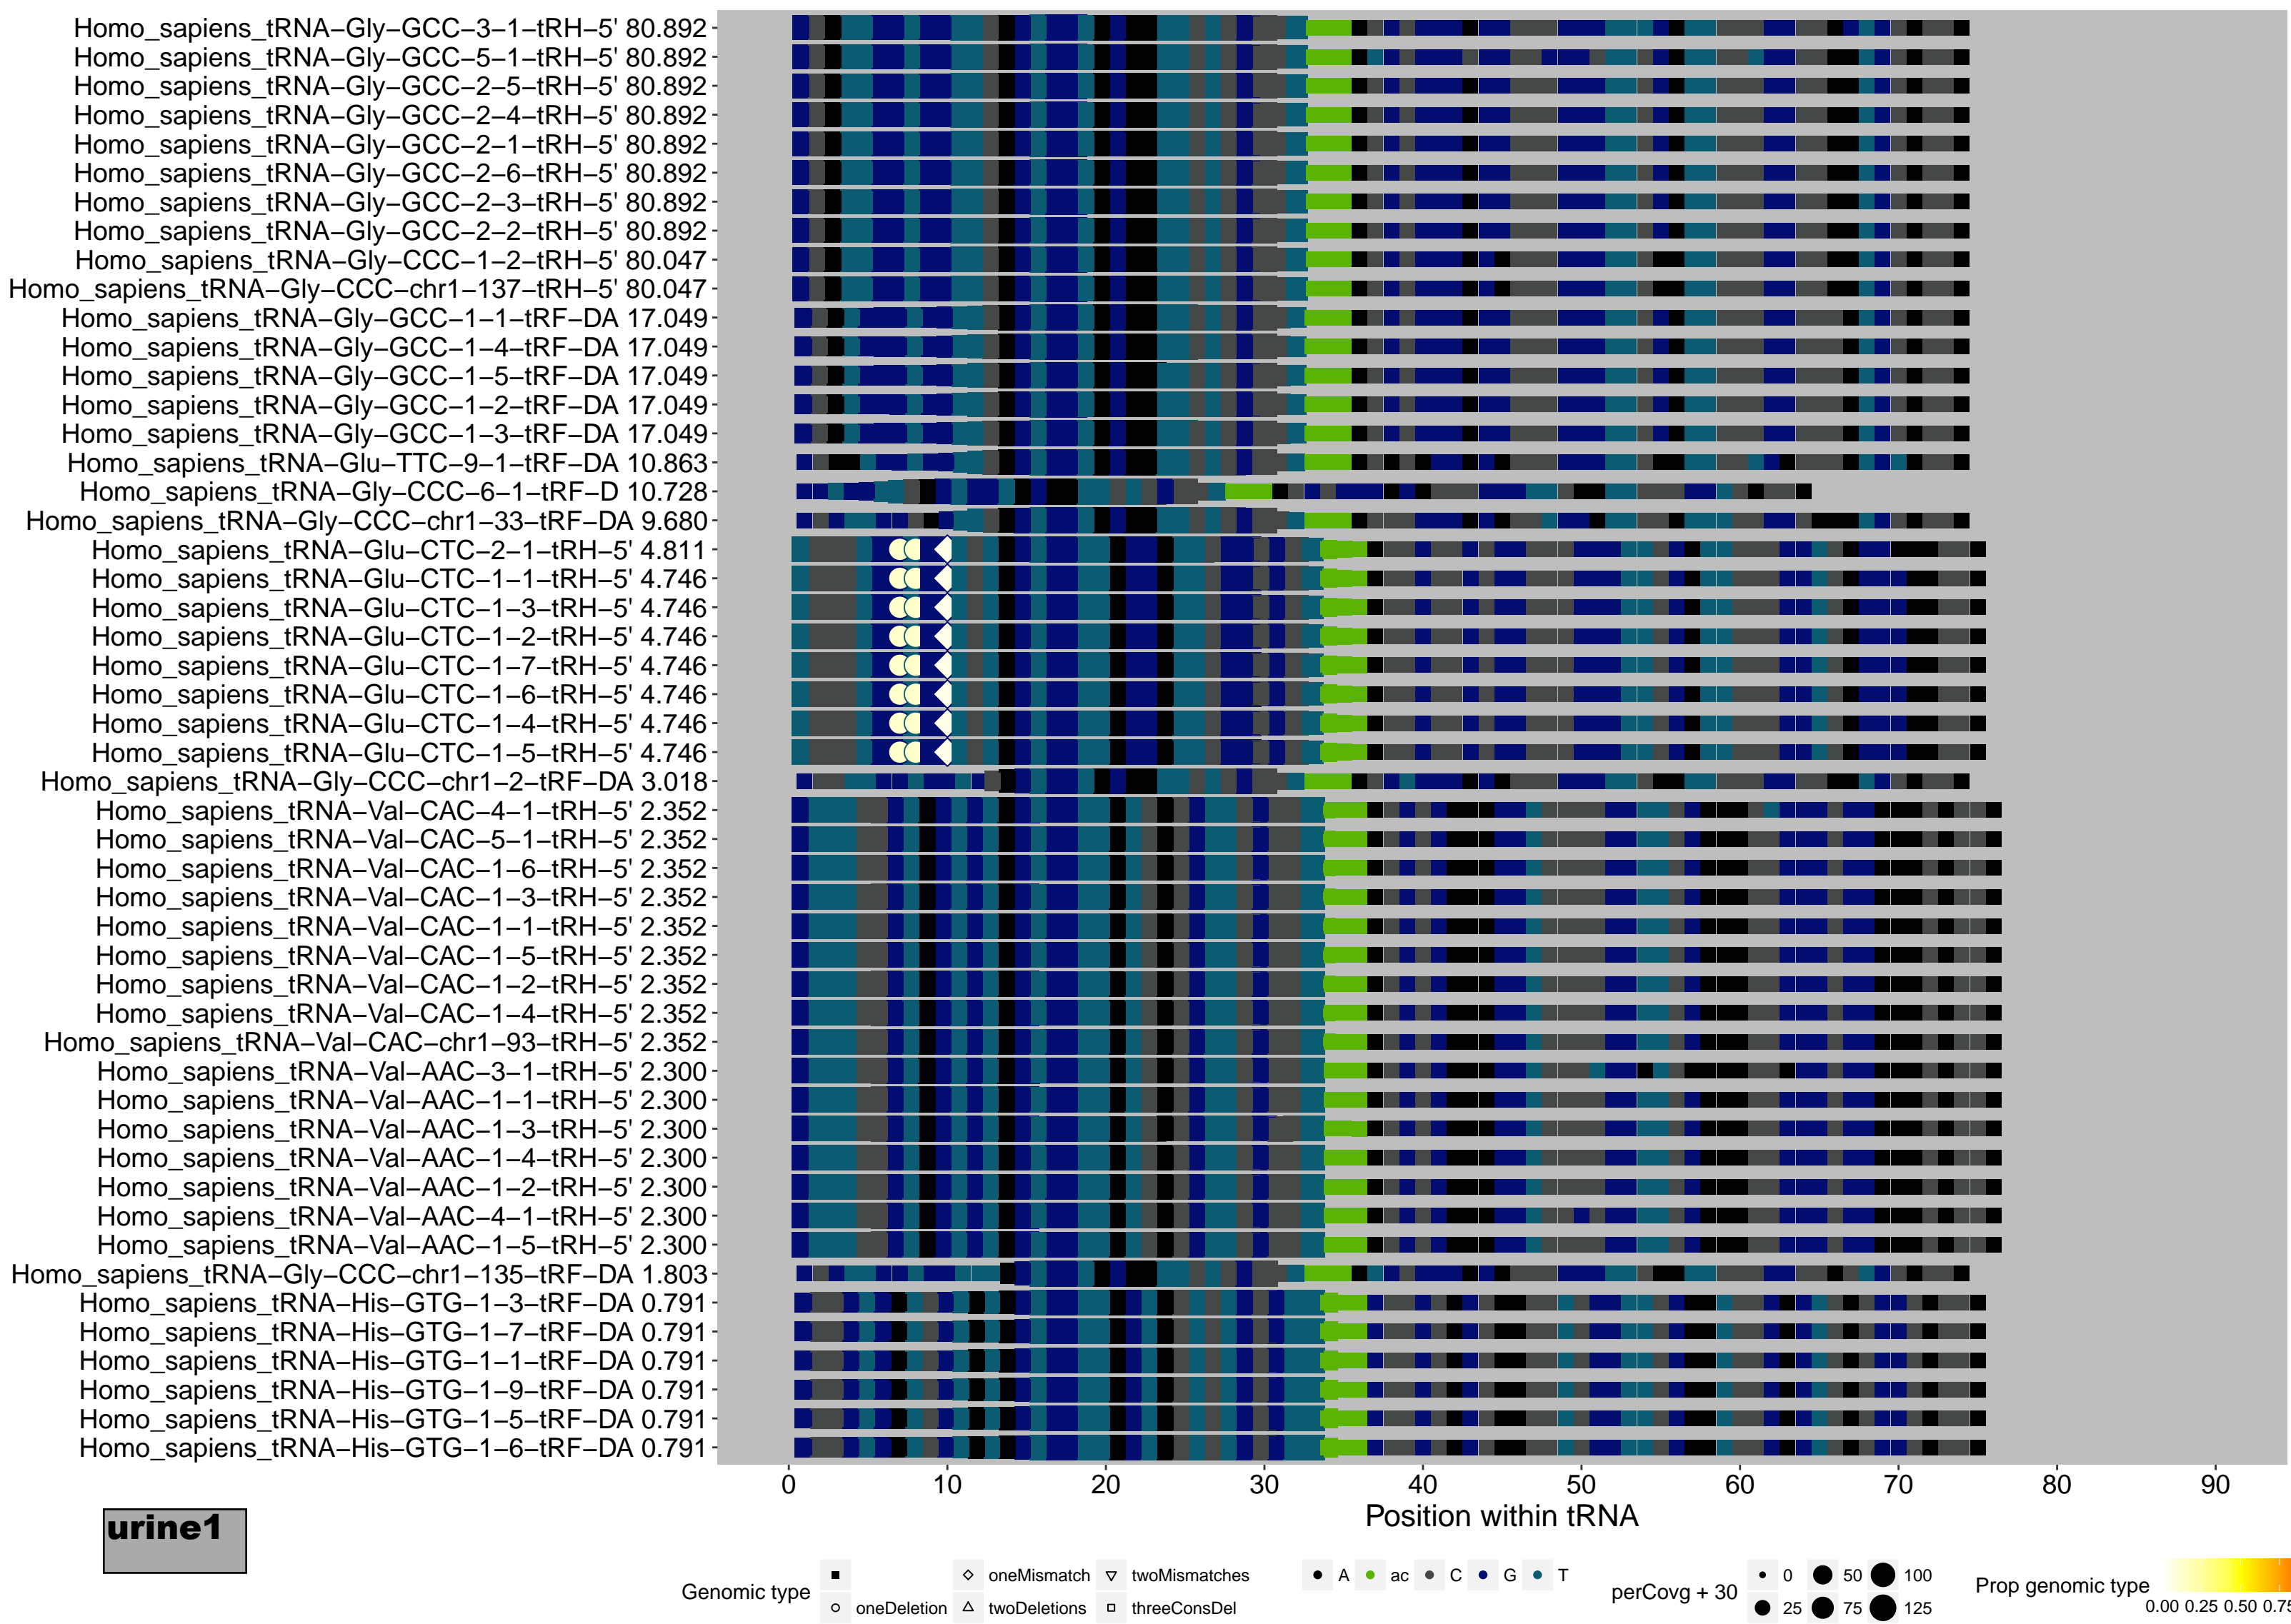

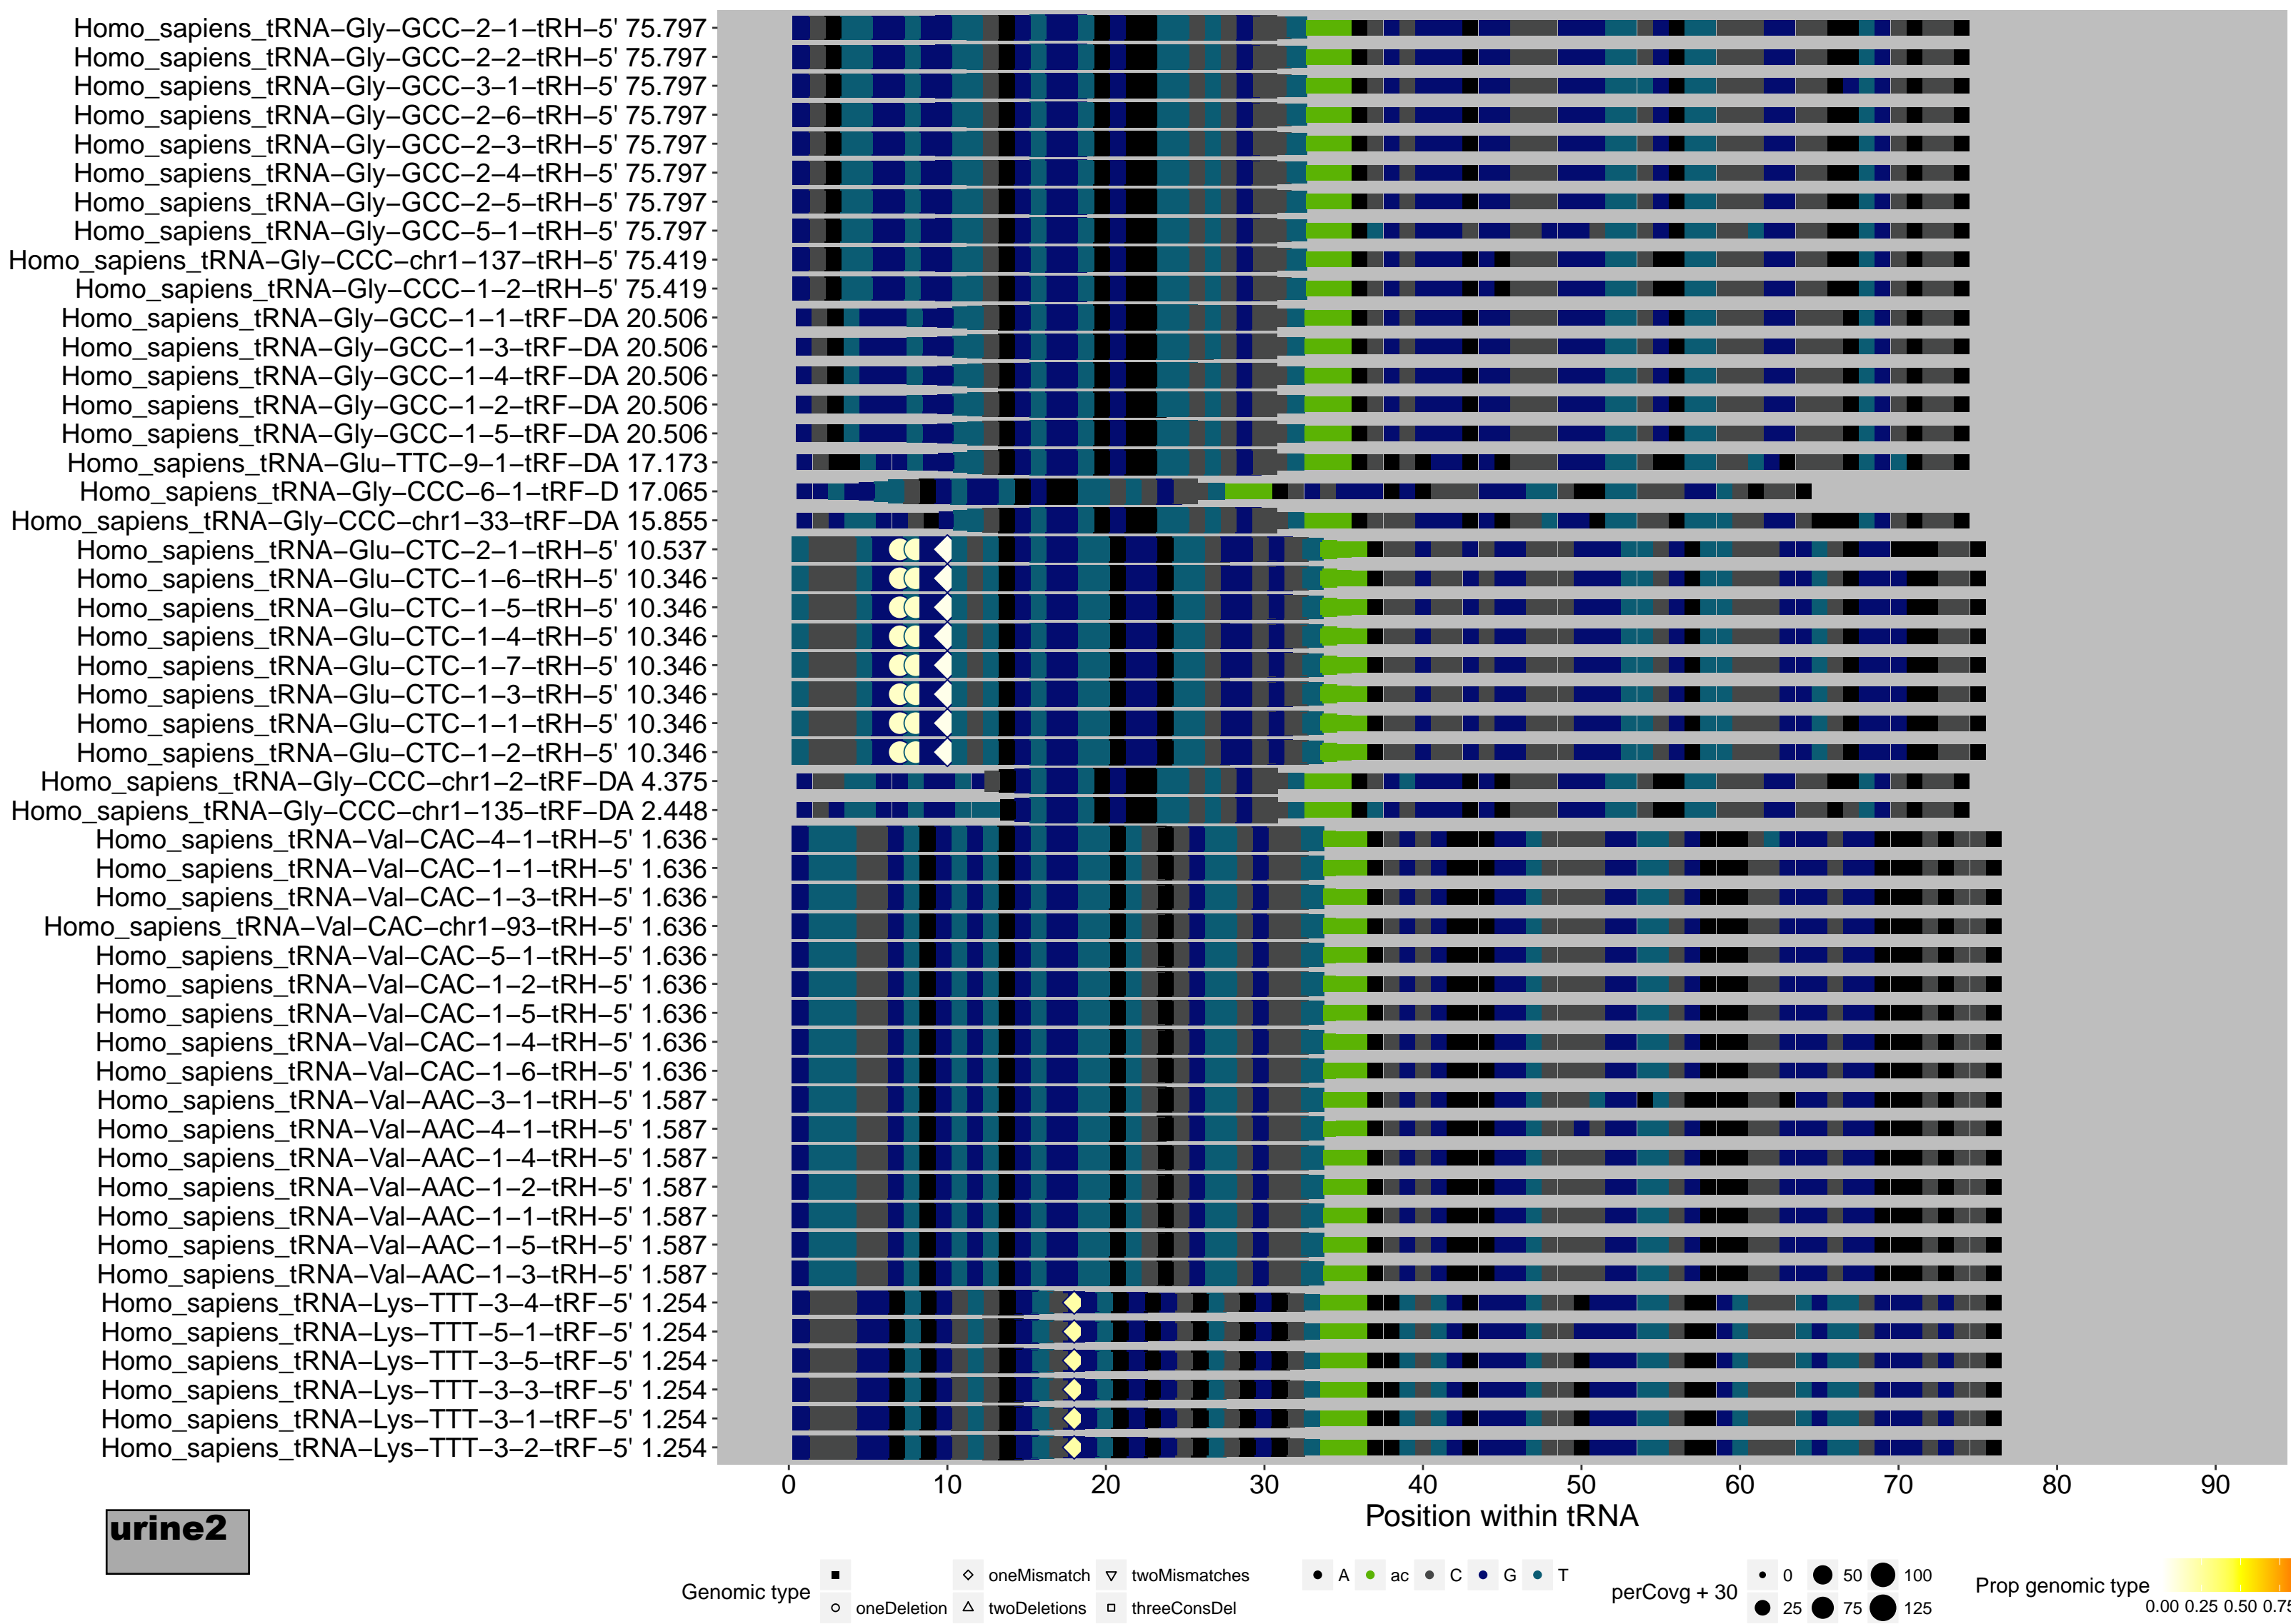

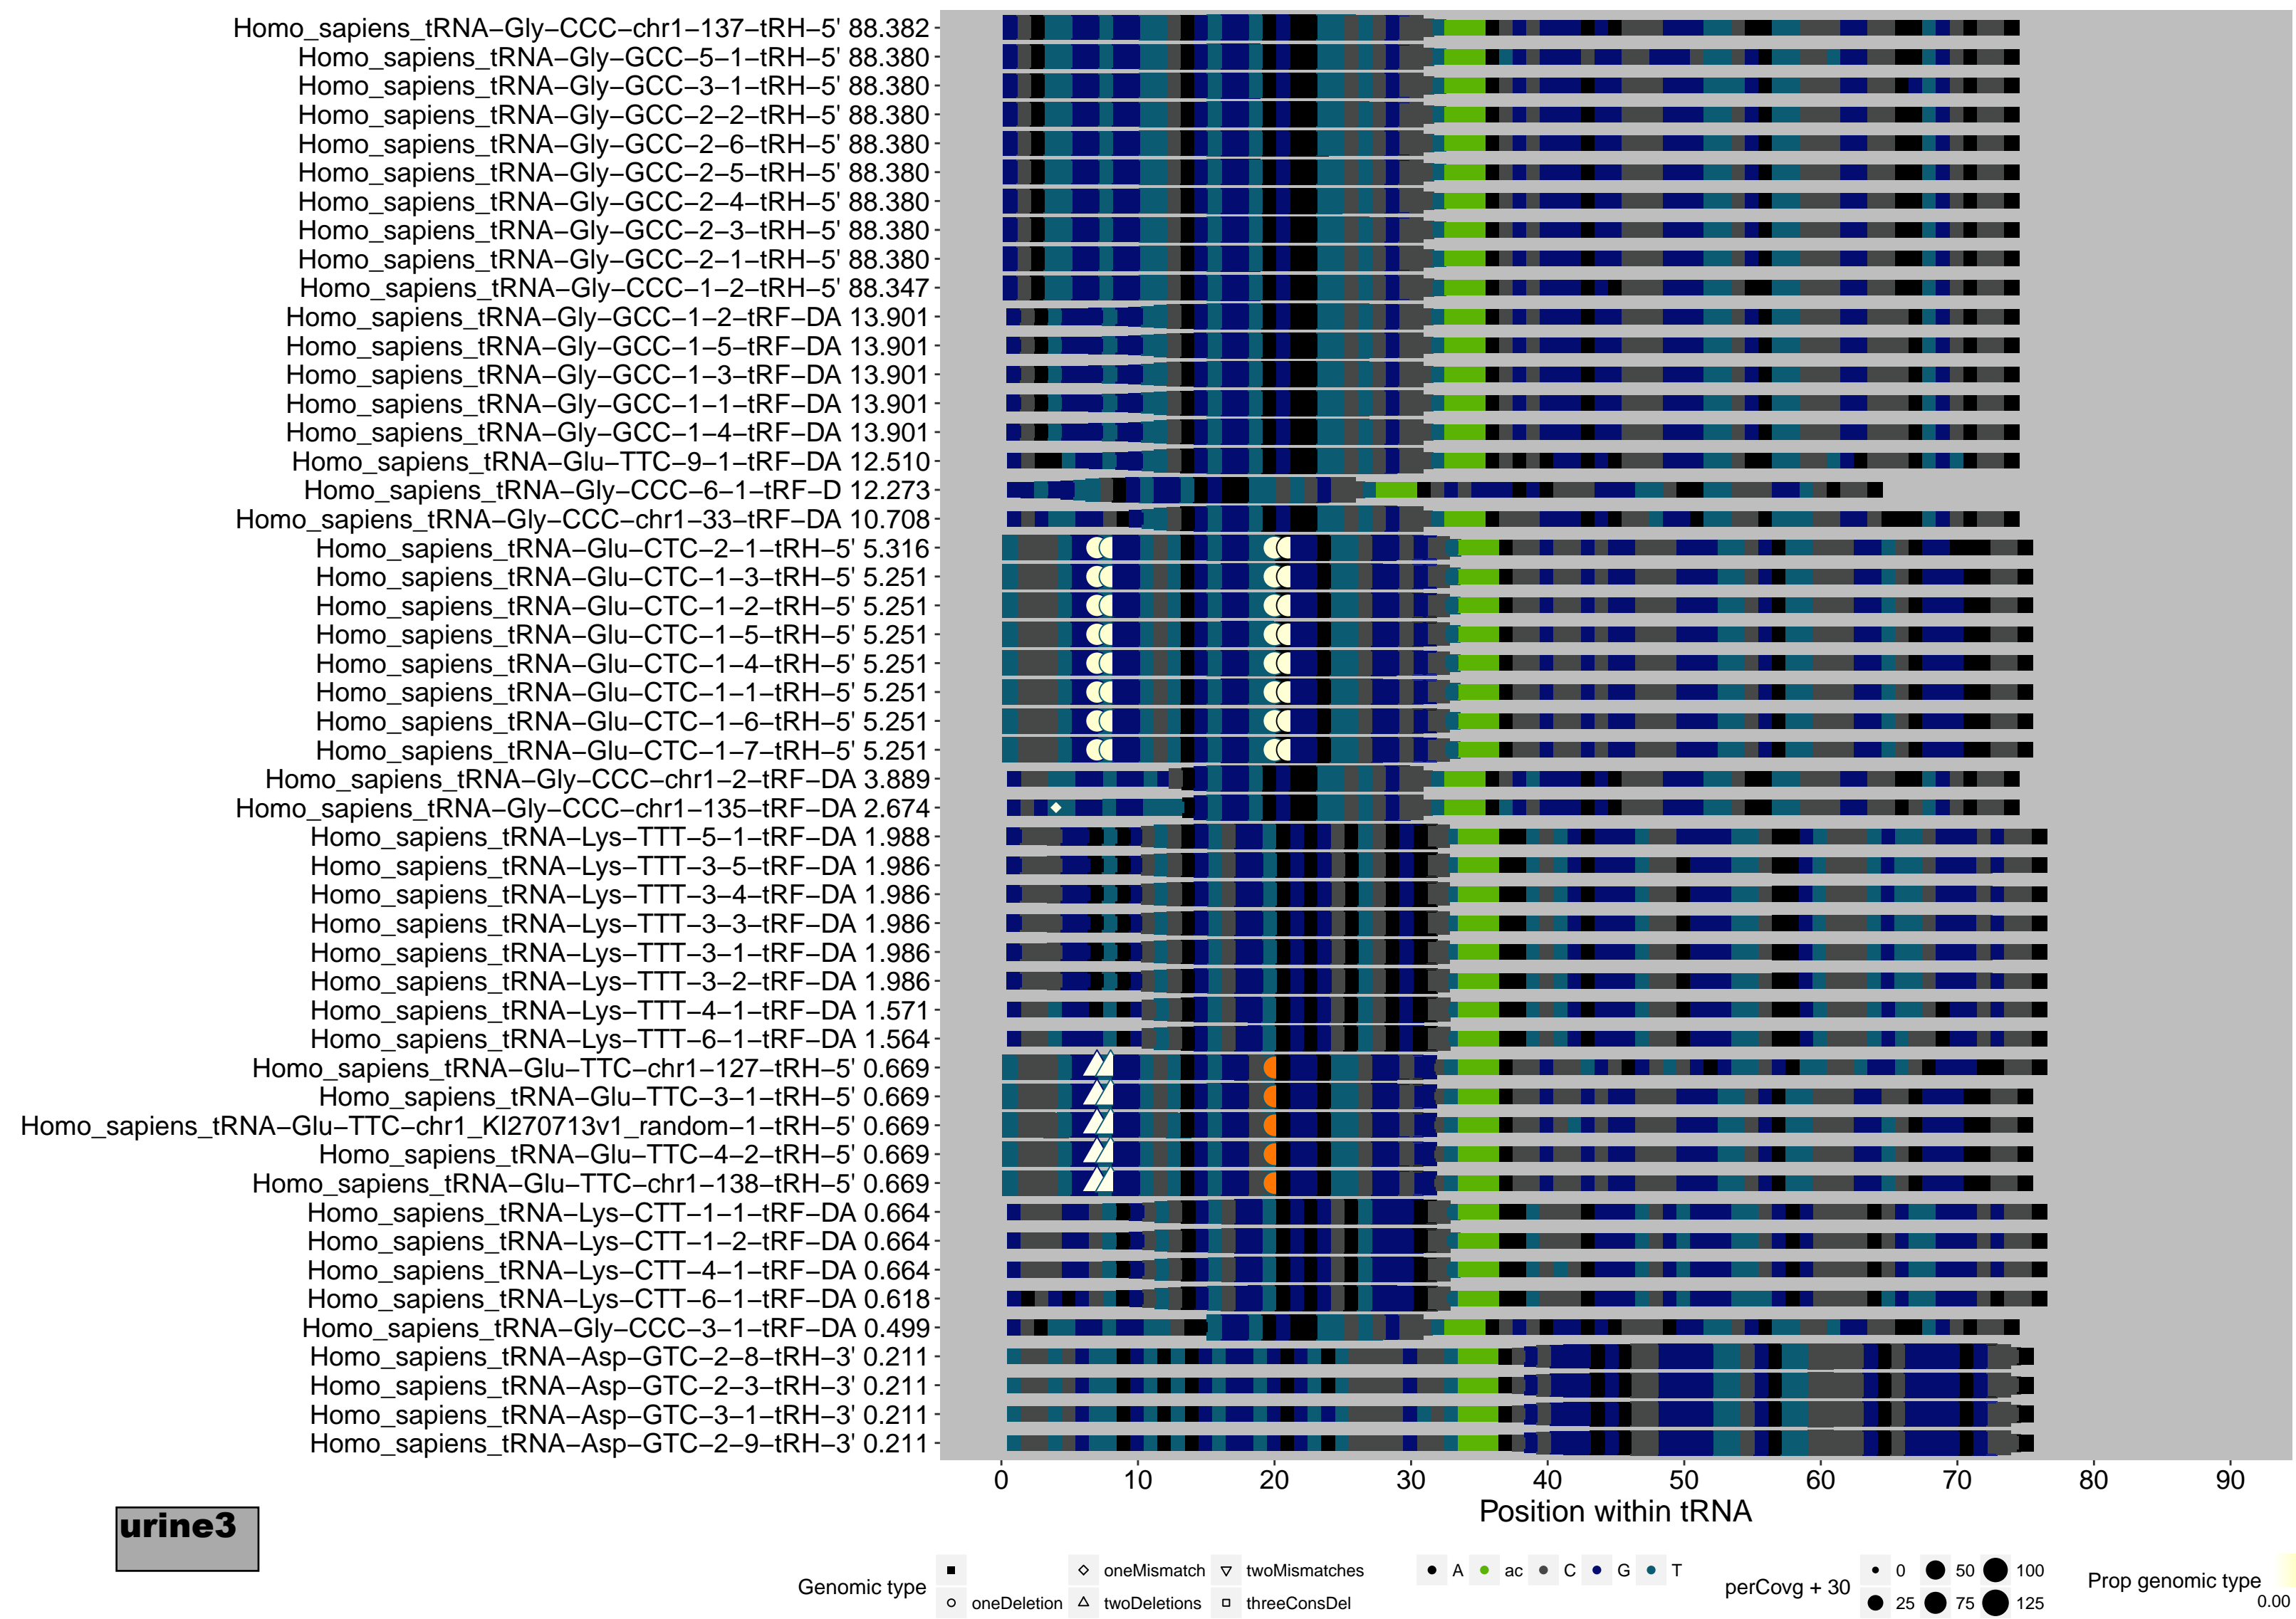

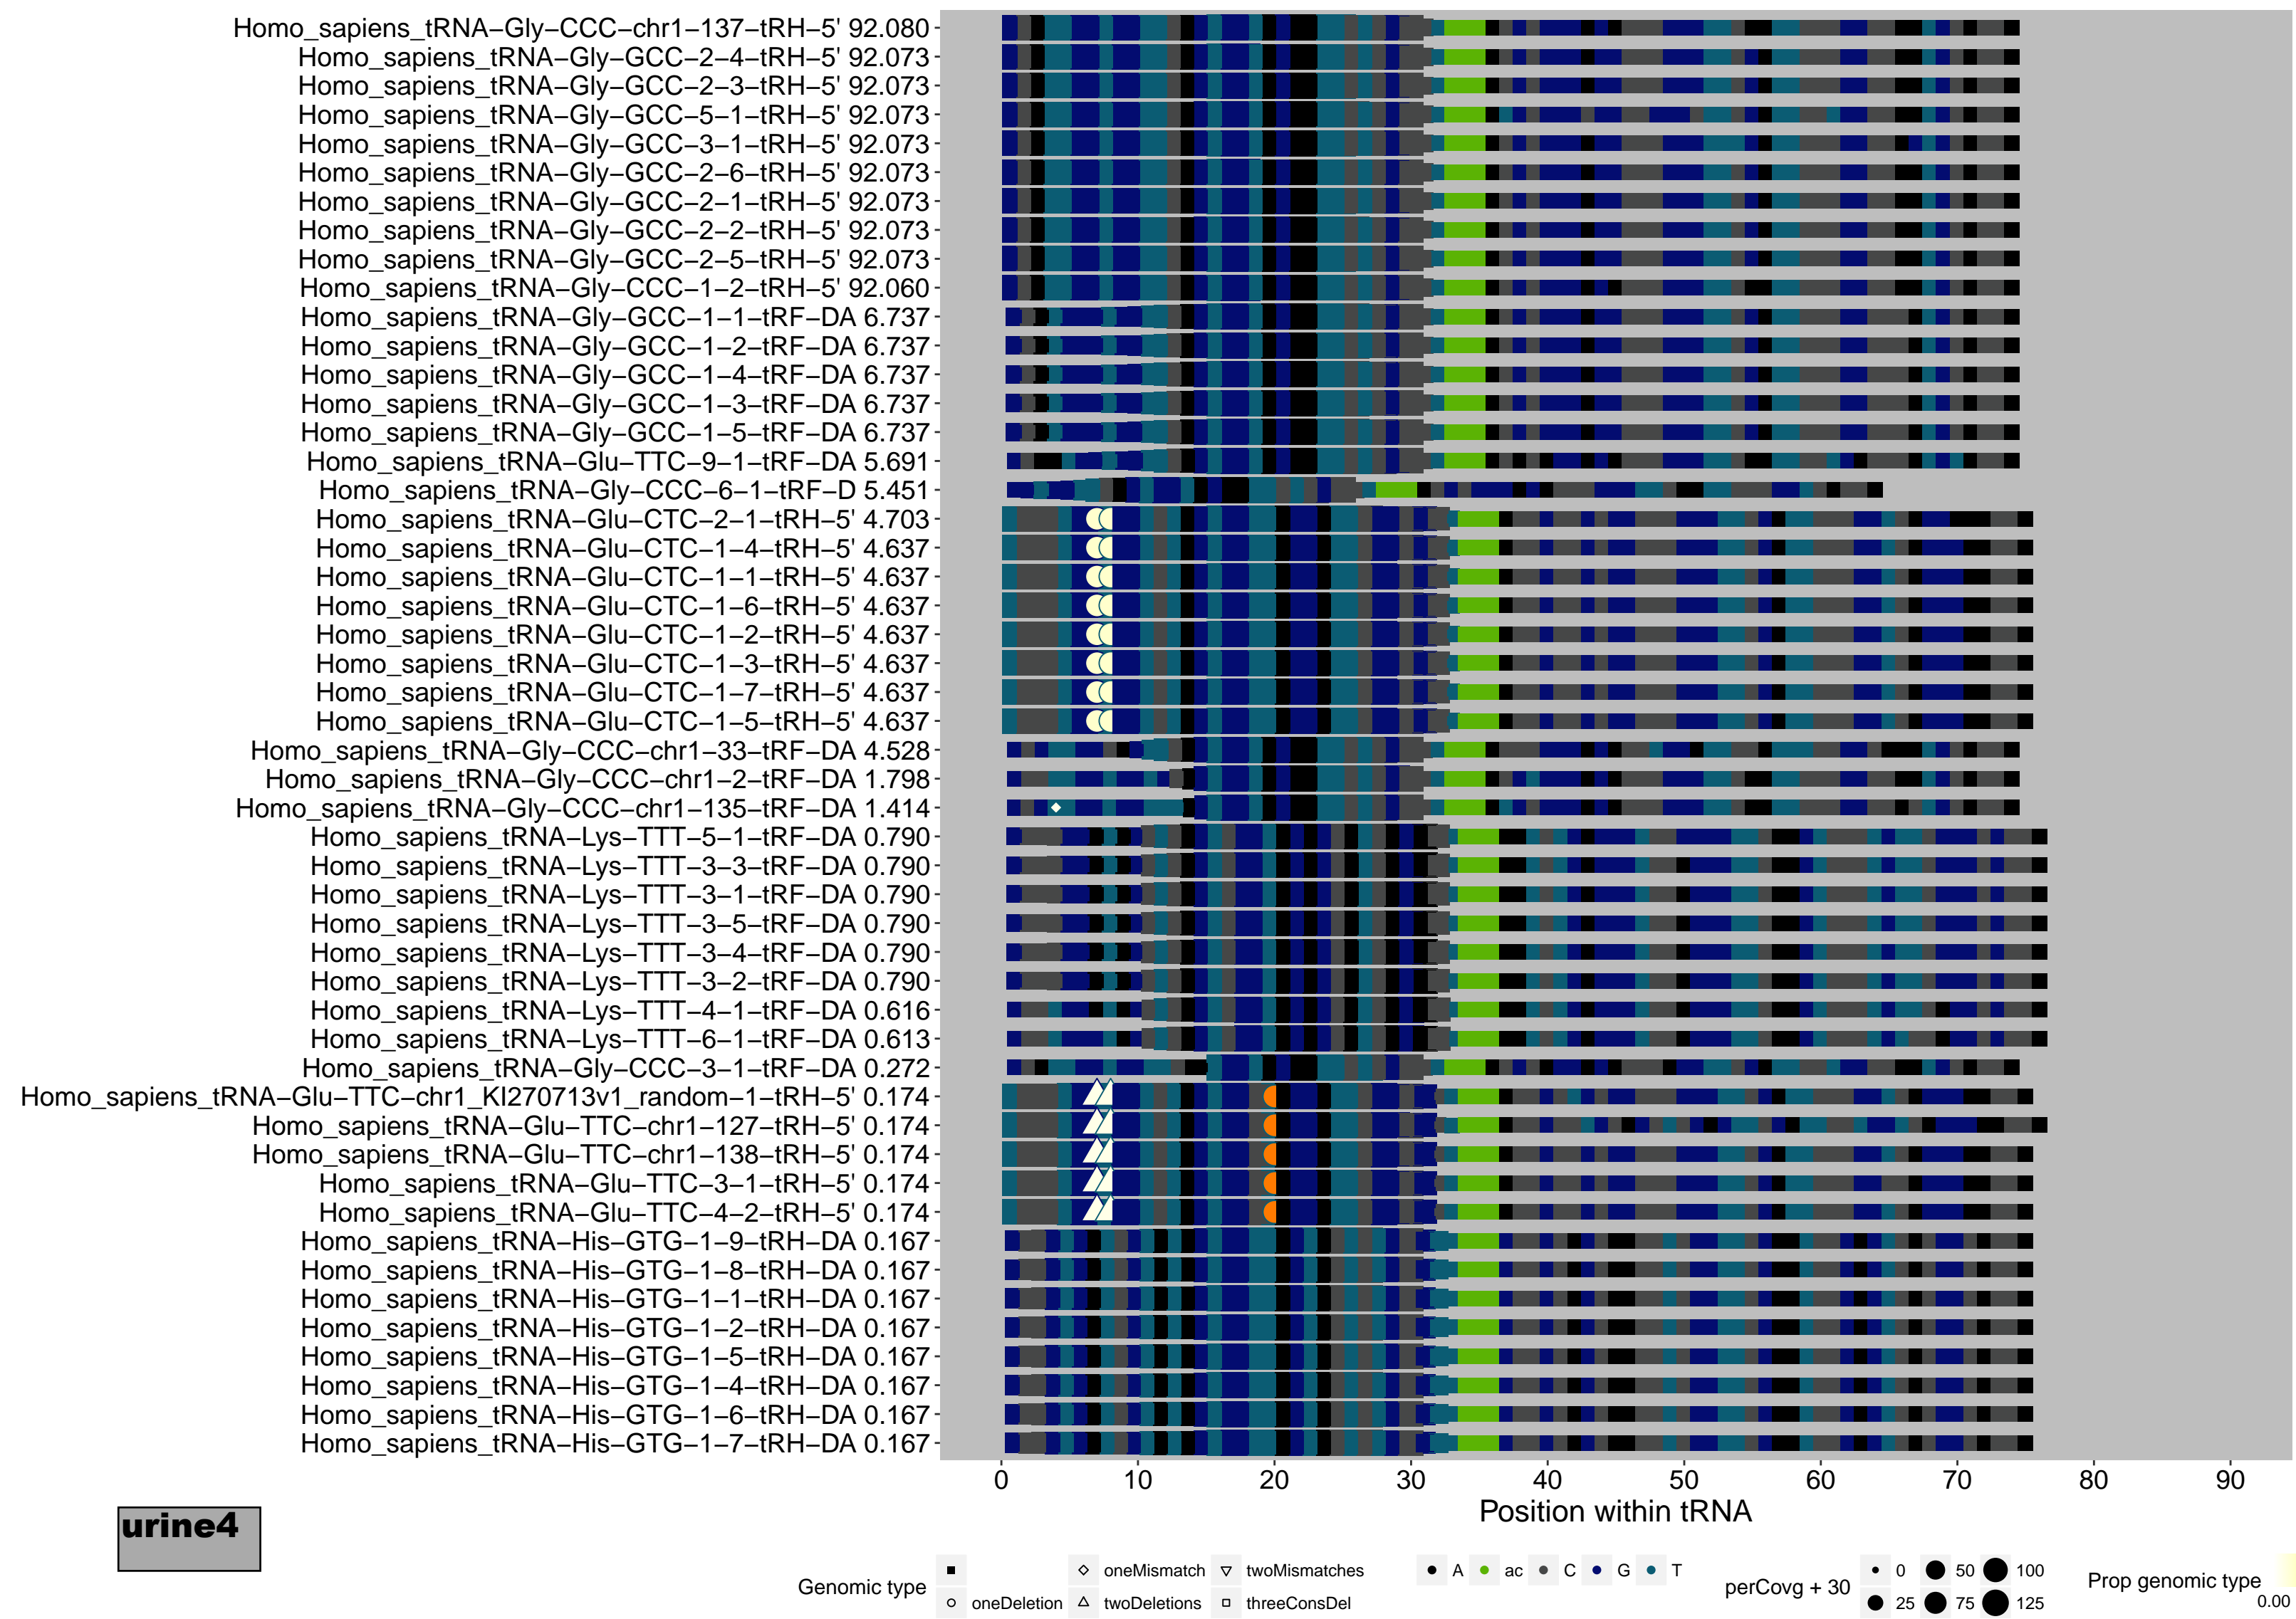

Supplement: 12864_2018_4785_MOESM12_ESM.pdf [file 12864_2018_4785_MOESM12_ESM.pdf]
