# Supplementary material for: Diversity and signature of small RNA in different bodily fluids using next generation sequencing
Source: PubMed Central journal article supplement (PMC5975555; doi:10.1186/s12864-018-4785-8), 2018-05-29
Supplement: 12864_2018_4785_MOESM15_ESM.pdf [file 12864_2018_4785_MOESM15_ESM.pdf]

root  
100%  
cellular  
organisms  
100%

Bacteria  
87%

Eukaryota  
7.7%

Proteobacteria  
34.5%

Firmicutes  
12.3%

Bacteroidetes/Chlorobi  
group  
24.3%

Actinobacteria  
6.9%

Gammaproteobacteria  
11.7%

Alphaproteobacteria  
15.3%

Betaproteobacteria  
3.7%

Bacilli  
6.5%

Fusobacteria  
3%

Bacteroidetes  
24.3%

Actinobacteria  
5.1%

Pasteurellales  
10.4%

Rhizobiales  
10.3%

Burkholderiales  
2.4%

Lactobacillales  
6%

Clostridia  
1.9%

Negativicutes  
3.2%

Fusobacteriales  
3%

Bacteroidia  
23%

Actinomycetales  
1.6%

Micrococcales  
1.4%

Pasteurellaceae  
10.4%

Rhizobiaceae  
5.6%

Caulobacteraceae  
1.2%

Alcaligenaceae  
0.9%

Burkholderiaceae  
0.9%

Neisseriaceae  
1.2%

Epilobacteriaceae  
1%

Bacillales  
0.8%

Lachnospiraceae  
1.6%

Selenomonadales  
3.2%

Fusobacteriaceae  
1.6%

Leptotrichaceae  
1.3%

Flavobacteriaceae  
0.4%

Bacteroidales  
23%

Actinomycetales  
1.6%

Micrococcales  
1.4%

Haemophilus  
4.7%

Rhizobium/Agrobacterium  
group  
3.1%

Brevimonas  
1.2%

Achromobacter  
0.9%

Lautropia  
0.9%

Neisseria  
0.8%

Campylobacteraceae  
0.8%

Bacillales  
0.1%

Oribacterium  
1.2%

Selenomonas  
0.2%

Veillonellaceae  
3.1%

Fusobacterium  
1.6%

Leptotrichia  
0.8%

Flavobacteriaceae  
0.4%

Porphyromonas  
0.4%

Prevotellaceae  
19.6%

Actinomycetales  
1.6%

Micrococcales  
1.4%

Haemophilus  
parainfluenzae  
2.4%

Agrobacterium  
1.9%

Brevimonas  
dimidiata  
0.5%

Achromobacter  
piechuanii  
0.4%

Lautropia  
mirabilis  
0.8%

Neisseria  
ATCC 51599  
0.6%

Campylobacter  
0.8%

Bacillales  
Family XI  
0.1%

Oribacterium  
sp1  
0.1%

Oribacterium  
sinus  
0.268  
0.3%

Veillonella  
2.4%

Leptotrichia  
wadei  
0.3%

Leptotrichia  
sp. strain 215  
0.2%

Prevotella  
denecourii  
0.8%

Prevotella  
nigrescens  
0.4%

Prevotella  
pallens  
ATCC 700821  
1.2%

Haemophilus  
parainfluenzae  
T3T1  
0.5%

Agrobacterium  
1.9%

Brevimonas  
dimidiata  
0.5%

Achromobacter  
piechuanii  
HLE  
0.4%

Lautropia  
mirabilis  
ATCC 51599  
0.6%

Achromobacter  
piechuanii  
HLE  
0.4%

Lautropia  
mirabilis  
ATCC 51599  
0.6%

Achromobacter  
piechuanii  
HLE  
0.4%

Lautropia  
mirabilis  
ATCC 51599  
0.6%

Achromobacter  
piechuanii  
HLE  
0.4%

Lautropia  
mirabilis  
ATCC 51599  
0.6%

Achromobacter  
piechuanii  
HLE  
0.4%

Lautropia  
mirabilis  
ATCC 51599  
0.6%

Achromobacter  
piechuanii  
HLE  
0.4%

Lautropia  
mirabilis  
ATCC 51599  
0.6%

Achromobacter  
piechuanii  
HLE  
0.4%

Lautropia  
mirabilis  
ATCC 51599  
0.6%

Achromobacter  
piechuanii  
HLE  
0.4%

Lautropia  
mirabilis  
ATCC 51599  
0.6%

Achromobacter  
piechuanii  
HLE  
0.4%

Lautropia  
mirabilis  
ATCC 51599  
0.6%

Achromobacter  
piechuanii  
HLE  
0.4%

Lautropia  
mirabilis  
ATCC 51599  
0.6%

Viridiplantae  
2.9%

Streptophyta  
2.9%

Streptophytina  
2.9%

Embryophyta  
2.6%

Tracheophyta  
2.9%

Euphyllophyta  
2.6%

Spermatophyta  
2.6%

Magnoliophyta  
2.6%

Mesangiospermae  
2.6%

Lilopsida  
2%

Petrosylviidae  
1

commelinids  
2%

Poales  
2%

Poales  
2%

Poaceae  
2%

BDP  
clade  
1.3%

Poaceae  
1.5%

Triticoidae  
1.5%
